# Supplementary material for: Glacier changes and surges over Xinqingfeng and Malan Ice Caps in the inner Tibetan Plateau since 1970 derived from Remote Sensing Data
Source: Copernicus journal article supplement (doi:10.5194/tc-2019-94), 2019-05-15
Supplement: Supplementary file [file tc-2019-94-AC1-supplement.zip]

# Glacier changes and surges over Xinqingfeng and Malan Ice Caps in the inner Tibetan Plateau since 1970 derived from Remote Sensing Data

Zhen Zhang<sup>1\*</sup>, Shiyin Liu<sup>2,3\*</sup>, Zongli Jiang<sup>4</sup>, Donghui Shangguan<sup>3</sup>, Junfeng Wei<sup>4</sup>, Wanqin Guo<sup>3</sup>, Junli Xu<sup>5</sup>, Yong Zhang<sup>4</sup> and Danni Huang<sup>1</sup>

<sup>1</sup>School of Geomatics, Anhui University of Science and Technology, Huainan, 232001, China

<sup>2</sup>Institute of International Rivers and Eco-Security, Yunnan University, Kunming, 650500, China

<sup>3</sup>State Key Laboratory of Cryospheric Science, Northwest Institute of Eco-Environment and Resources, Chinese Academy of Sciences, Lanzhou, 730000, China

<sup>4</sup>School of Resource Environment and Safety Engineering, Hunan University of Science and Technology, Xiangtan, 411201, China

<sup>5</sup>College of Urban and Environmental Sciences, Yancheng Teachers University, Yancheng, 224002, China

Correspondence to: Zhen Zhang (zhangzhen@aust.edu.cn) and Shiyin Liu (shiyin.liu@ynu.edu.cn)

**Abstract.** The inner Tibetan Plateau region is a glaciated region where glaciers show heterogeneous change. The Xinqingfeng and Malan ice caps are located in this region and a transition zone exists with shifting influences between the westerlies and Indian summer monsoon area with heterogeneous variations. However, information regarding the detailed glacier area and mass changes in this region prior to the year 2000 are scarce, and there are limited processes available to understand this heterogeneity. In this the present paper study, we present an integrated view of the glacier area and its mass changes for Mt. Xinqingfeng and Mt. Malan of the inner Tibetan Plateau as derived from topographic maps, Landsat, ASTER, SRTM DEM, and TerraSAR-X/TanDEM-X for the period of from 1970- to 2012 and from 1970- to 2018, respectively. Our results showed that the glaciers experienced a weak-slight shrinkage in area by  $0.09 \pm 0.03\%$   $a^{-1}$  from 1970 to 2018, with but there was a median mass loss at a rate of  $0.22 \pm 0.17$  m w.e.  $a^{-1}$  and  $0.29 \pm 0.17$  m w.e.  $a^{-1}$  during between 1999- and 2012 in at Mt. Xinqingfeng and Mt. Malan, respectively. The glaciers of Mt. Malan have had a lower total mass loss of  $0.19 \pm 0.14$  m w.e.  $a^{-1}$  during 1970-1999. A minimum of seven glaciers at Mt. Xinqingfeng and Mt. Malan showed heterogeneous variations with either surging or advancing during the observation period. Among them, the West Monumaha Glacier, Monumaha Glacier, and Zu Glacier were identified as surging glaciers, and the others may also be surging glaciers, although more evidence is required. The mean velocity of the glaciers during 2013-2018 was  $0.16$  m  $d^{-1}$ , as demonstrated from the Global Land Ice Velocity Extraction from Landsat 8 (GoLIVE). The Monumaha Glacier and Zu Glacier together with another 5 glaciers displayed the surging or advancing characteristics during the observation period. These glaciers showed a long active period of time and comparatively low velocities, which suggests that, therefore, thermal controls are important for the surge initiation and recession. The ablation area or accumulation area exhibited small slopes

设置了格式: 字体颜色: 红色

设置了格式: 上标

with velocities that were too slow to remain in balance with the accumulation rate; thus, they required surging to transport mass from the reservoir area down the glacier tongue.

设置了格式: 字体: (中文) Times New Roman

## 1 Introduction

Glaciers in the High Mountains Asia (HMA) are the headwater sources for many rivers and lakes. ~~As a result~~ Thus, the HMA is ~~often~~ also known as the ‘Asia Water Tower’ (Immerzeel et al., 2010). ~~In~~ During the recent warming climate, many sub-regions of the HMA, such as the Himalayas, Nyainqentanglha, ~~and~~ Tien Shan, ~~Bhutan, Nepal, and Spiti Lahaul,~~ have experienced glacier mass loss (Brun et al., 2017; Farinotti et al., 2015; Kääb et al., 2012; Kääb et al., 2015; Wu et al., 2018). However, glaciers in ~~the~~ Pamir, Karakoram and West Kunlun have, on average, been in near balance or have shown a mass gain, ~~which is attributed to the strengthening westerlies~~ in recent years, ~~although these results have been debated~~ (Bao et al., 2015; Bolch et al., 2017; Gardelle et al., 2012b; Gardelle et al., 2013; Holzer et al., 2015; Kääb et al., 2015; Lin et al., 2017; Zhang et al., 2016). ~~The very large inner Tibetan Plateau (ITP) region is located in the transition zone of the atmospheric circulation systems of monsoon and westerlies and is dominated more by continental climate conditions, with glaciers at ITP showing heterogeneous variations. Glaciers found in the eastern and southern ITP have shown significant retreating and mass loss, which is similar to that seen at the Himalayas and Nyainqentanglha and is influenced by the weakening Indian monsoon (Brun et al., 2017; Yao et al., 2012). However, glaciers in the western ITP have shown near stable or slight mass gain, which accords with West Kunlun and is influenced by the strengthening westerlies (Brun et al., 2017; Yao et al., 2012). According to the results of glacier elevation changes and mass balance for HMA (2000–2016) reported by Brun et al. (2017), glaciers at the north side of 32° N at ITP showed a clear east-west direction difference, those at the west side of 90° E showed near stable or slight mass gain, and on the east side showed significant retreating and mass loss. Four main clusters of glaciers (Kangzhag Ri, Purogangri, Xinqingfeng and Malan Ice Caps (collective known as XM) and Geladandong) are distributed near 90° E. Among them, Kangzhag Ri and Purogangri are located at the west side of 90° E, and XM and Geladandong are located at the east side of 90° E. The latitude of Kangzhag Ri and XM are close, and the latitude of Purogangri and Geladandong are close. Several studies (Neckel et al., 2013; Zhang and Liu, 2018) have reported that glaciers at Kangzhag Ri and Purogangri experienced near stable mass ( $-0.04 \pm 0.02$  m w.e. a<sup>-1</sup>) and mass gain ( $+0.16 \pm 0.02$  m w.e. a<sup>-1</sup>) during 1999–2012, respectively (Neckel et al., 2013; Zhang and Liu, 2018). However, glaciers at Kangzhag Ri experienced a negative mass balance ( $-0.34 \pm 0.01$  m w.e. a<sup>-1</sup>) during 1970–1999 and glaciers at Geladandong experienced a negative mass balance ( $-0.21 \pm 0.16$  m w.e. a<sup>-1</sup>) during 1969–1999, and accelerated glacier mass loss ( $-0.33 \pm 0.38$  m w.e. a<sup>-1</sup>) during 1999–2015 (Chen et al., 2017). Therefore, how glaciers change at XM and whether these changes have been consistent with those of the glaciers at Kangzhag Ri and Purogangri is still an unresolved issue. There is little detailed analysis regarding the status of XM glaciers located to the east of Kangzhag Ri with limited knowledge regarding the glacier~~

mass change before 1999. Glacier surging can cause hazards, such as floods and associated impacts on downstream areas (Kotlyakov et al., 2004; Motyka and Truffer, 2007). HMA is one of the major ‘superclusters’ of glacier surge (Sevestre and Benn, 2015). However, there have been sporadic reports of surging glaciers for the ITP, such as Aru Co, Ányâmaq ên, Ulugh Muztagh, Namjagbarwa, and Geladandong (Guo et al., 2013; Jiang et al., 2018; Xu et al., 2018; Zhang, 1983; Zhang et al., 2018). Consequently, more attention is urgently required to investigate the recent glacier changes at XM.

Zhou et al. (2019) reported that Xinqingfeng and Malan had mass budgets of  $-0.21 \pm 0.10$  m w.e.  $a^{-1}$  and  $-0.22 \pm 0.10$  m w.e.  $a^{-1}$ , respectively, between 2000 and 2016 from optical stereo images (SPOT-6/7) and SRTM. Geodetic mass balance measurements by optical stereo data produces good results on rough surfaces, such as debris-coverd glacier surfaces, however, such measurements are difficult where there are clouds, shadow, and snow cover due to high saturation or low contrast alterations. As Interferometric synthetic-aperture radar (InSAR) is independent of visible structures and contrast of the glacier surface, therefore, it performs well in accumulation areas such as the snow cover of glaciers. SAR can perform well at all weather conditions. The single pass configuration of TerraSAR-X and TanDEM-X ensures a high coherence on glaciers which is advantageous compared to repeat-pass InSAR. The comparison between TerraSAR-X /TanDEM-X and SRTM has been employed for estimating the mass balance of glaciers after 1999 in the HMA (Lin et al., 2017; Neckel et al., 2013; Wu et al., 2018). Few optical stereo data exist before 2000, which has constrained the research for glacier mass changes before this time. The historical national topographic maps, which are strictly based on the national specialised standard, have a high accuracy and provide a fine depiction of glacier surface topography, and have been widely used for glaciological purposes, especially for glacier mass changes before 2000 (Wei et al., 2015a; Wei et al., 2015b; Zhang et al., 2016). In the present study, we used topographic maps, Landsat, ASTER, SRTM DEM, and TerraSAR-X/TanDEM-X to assess the glacier area and mass changes since 1970 for Mt. Xinqingfeng and Mt. Malan in the ITP. The study aimed to fill the knowledge gap of detailed studies in this region and to improve the knowledge of the glacier change anomaly, such as advancing and surging.

Glaciers in the Aru Co regions on the east of West Kunlun, where two glaciers collapsed in 2016, also showed mass gains ( $+0.33 \pm 0.61$  m w.e. a<sup>-1</sup>) in the early 21st century, which is in contrast to their mass loss ( $-0.15 \pm 0.30$  m w.e. a<sup>-1</sup>) before 1999 (Zhang et al., 2018). A similar result was reported for the Kangzhag Ri at the centre of the inner Tibetan Plateau (TP) with a mass gain of  $+0.16 \pm 0.02$  m w.e. a<sup>-1</sup> after 1999 and a loss ( $-0.34 \pm 0.01$  m w.e. a<sup>-1</sup>) before 1999 (Zhang and Liu, 2018). Glaciers in the Zangsar Kangri were reported as having a mass gain ( $+0.37 \pm 0.25$  m w.e. a<sup>-1</sup>) during 2003–2009 (Neckel et al., 2014). These glaciers are mainly located in the northwest and central parts of the Tibetan Plateau, and it is of great interest whether this same anomaly exists for glaciers that are further to the northeast of the plateau, for example, the Mt. Xinqingfeng and the Mt. Malan Ice Caps (collective known as XM). Although Zhou et al. (2019) reported Xinqingfeng and Malan mass budgets of  $-0.21 \pm 0.10$  m w.e. a<sup>-1</sup> and  $-0.22 \pm 0.10$  m w.e. a<sup>-1</sup>, respectively, for the period of 2000–2016, the knowledge of the glacier mass change before 1999 remains unknown.

Geodetic mass estimates have revealed weak mass losses for the entire inner TP for the period following 2000. However, the inner TP region is an aggregation of glacier balance heterogeneous sub-regions (Brun et al., 2017; Neckel et al., 2014). Glaciers in the southern and southeastern parts of the TP have suffered from significant retreat, while glaciers in the western parts have remained relatively stable or have even advanced (Brun et al., 2017; Chen et al., 2017; Lin et al., 2017; Neckel et al., 2013; Xu et al., 2018; Zhang and Liu, 2018). The XM is located in the northeast of the inner TP, and detailed glacier mass budget analyses for the XM glaciers, especially prior to the year 2000, are rare.

Glacier surging can cause hazards, such as related outburst floods and their associated impacts on the downstream areas (Kotlyakov et al., 2004; Motyka and Truffer, 2007). The HMA is one of the major ‘superclusters’ of glacier surge (Sevestre and Benn, 2015). However, most surged glacier clusters have been reported in Pamir, Karakoram and West Kunlun (Bhambri et al., 2017; Chudley and Willis, 2018; Copland et al., 2011; Kotlyakov et al., 2008; Shangguan et al., 2016). In other regions, there have been sporadic reports of surging glaciers for the inner TP, such as, Aru Co, Anyamaqên, Ulugh Muztagh, Namjagbarwa and Geladandong (Guo et al., 2013; Jiang et al., 2018; Xu et al., 2018; Zhang, 1983; Zhang et al., 2018). Although there is a high incidence and coverage of surge-type glaciers in the HMA, detailed analyses are rare and there could be more regions that contain surging glaciers that have not been unveiled. To our knowledge, there is a lack of reports regarding surge-type glaciers in the XM.

Topographic maps have been proven as suitable when assessing glacier areas and mass changes. The Shuttle Radar Topography Mission (SRTM) DEM and single-pass X-band InSAR from the TerraSAR-X and TanDEM-X digital elevation measurements have yielded good results regarding glacier elevation change measurements. We used these data in our study to assess the glacier mass changes in the XM from 1970/71 to 2011/12. We also analysed glacier area changes from 1970/71 to 2018 as derived from glacier inventories and Landsat images. In addition, glacier surge and/or advance in this region was also considered.

## 2 Study area

Xinqingfeng (also called Buka Daban Peak, see Fig. 1) is located in the ~~centre-central~~ Hoh Xili region of the Kunlun Mountain. It is a small ice cap that developed on the planation surface of Kunlun Mountain. The highest elevation is 6860 m above sea level (a.s.l.). According to the second Chinese glacier inventory (CGI), Xinqingfeng ~~contains-contained~~ 77 glaciers with a total area of 425.4 km<sup>2</sup> in 2006. The glaciers are distributed around the ice cap with short tongues and with an

设置了格式: 非上标/下标

设置了格式: 非上标/下标

设置了格式: 非上标/下标

带格式的: 标题 1

域代码已更改

设置了格式: 非上标/下标

设置了格式: 非上标/下标

域代码已更改

设置了格式: 非上标/下标

域代码已更改

设置了格式: 非上标/下标

设置了格式: 非上标/下标

设置了格式: 字体: (默认) Times New Roman

设置了格式

设置了格式: 字体颜色: 自动设置

average ~~terminal-terminus~~ altitude of approximately 5,056 m. The largest glacier is located on the southeastern slope called Monuomaha Glacier (or Xinqingfeng Glacier, Glacier No. 4), with an area of 83.9 km<sup>2</sup>, and the second largest glacier is located on the northwestern slope called the West Monuomaha Glacier (Glacier No.2), with an area of 69.0 km<sup>2</sup>.

The Malan Ice Caps (Fig. 1) are located on the southwest side of Xinqingfeng, where the highest elevation is 6,056 m a.s.l.

5 According to the second CGI, the Malan Ice Caps contains 59 glaciers with a total ~~of~~ area of 189.7 km<sup>2</sup>. The largest glacier (Glacier No.14) is located on the southern slope, with an area of 30.4 km<sup>2</sup>.

The XM is weakly affected by the westerly circulation and monsoon circulation. The mean annual air temperature is approximately -10 °C, and the annual precipitation is 173–494 mm in Hoh Xil (Li, 1996). More than 90% of the precipitation is concentrated between May and September, therefore, the glaciers in this region belong to the summer-

10 accumulation type (Li, 1996). Xie et al. (2000) reported the~~Based on fieldwork of the Kumukuli basin on the north side of Xinqingfeng, the precipitation in the Kumukuli basin from June to July of 1985 was 216 mm, and annual precipitation was estimated to be above 300 mm. In this same report, the~~ annual precipitation of the Taiyanghu basin on the side of the Malan Ice Caps was 170 mm, with approximately 80% of the precipitation concentrated during the warm season (from May to October) ~~(Xie et al., 2000). Based on the first CGI, n~~And near the snowline of Xinqingfeng, the average elevation was 5,440  
15 m, the annual average air temperature was -15.4 °C, and the annual precipitation was 340 mm (Xie et al., 2000). The average elevation of the snowline at the Malan Ice Caps was 5445 m and the air temperature was estimated as -11.5 °C (Xie et al., 2000). Based on a 107.07 m ice core recorded from the Malan Ice Cap in May 1999, there has been a warming trend during the 20th century and the warmest period recorded was during the 1950s to the early 1980s. There have also been several colder stable periods during the warming period, with a colder climate during the late 1980s to 1990s (Wang et al.,  
20 2003).

### 3 Data and methods

#### 3.1 Topographic maps

Four topographic maps with a 1:100,000 scale (sheet numbers: I-46-2, I-46-3, J-46-134 and J-46-135) were constructed from aerial photographs taken between 1970/ and 1971 by the State Bureau of Surveying and Mapping of China (SBSMC)~~the~~  
25 Chinese Military Geodetic Service (CMGS) and used in glacier outlines ~~digitized-digitised~~ for the first CGI. The contour lines of ~~the three of the~~ topographic maps, ~~with the exception of except for~~ J-46-134, were obtained from the ~~SBSMC~~CMGS and were georeferenced ~~into~~ the WGS84/EGM96 using a seven-parameter transformation method. These were then interpolated into DEMs (hereafter, referred to as TOPO DEMs) with a spatial resolution of 30 m. These TOPO DEMs covered the entire Malan area and a small portion of Xinqingfeng. The contour lines of the topographic maps were derived  
30 manually using an analytical plotter, and the accuracy of these was strictly controlled and verified based on the

设置了格式: 字体: (默认) Times New Roman

photogrammetric Chinese National Standard (GB/T12343.1-2008, 2008). The plane root mean square error (RMSE) for topographic maps with a 1:100,000 scale was less than 0.5 mm for flat and hilly areas (with slopes of  $< 2^\circ$  and  $2-6^\circ$  respectively) and less than 0.75 mm for the mountain areas and high mountain areas (with slopes of  $6-25^\circ$  and  $> 25^\circ$  respectively). The vertical RMSE of these topographic maps were less than 6–10 m for flat and hilly areas and less than 16–28 m for the mountain areas and high mountain areas. Because the slopes of most of the glacierised areas in the study area were gentle ( $\sim 12^\circ$ ), the plane and vertical accuracy of the TOPO DEMs were better than 0.75 mm and 16 m on glaciers, respectively. The digital contour lines were from SBSMC, which were produced and inspected in strict accordance with the photogrammetric Chinese National Standard (GB/T12343.1-2008, 2008). We converted these lines to Grid DEM using the triangular irregular network (TIN) method, which produces a higher accuracy while meeting the Chinese National Standard (GB/T12343.1-2008, 2008) and reflects the true mountainous terrain much better (Wang et al., 2014).

Table 1 shows that TOPO DEMs were acquired during the winter season (between October and December). To accurately estimate the glacier mass balance, the possible seasonal mass changes during winter need to be corrected. However, both snowfall and melt mainly occur during summer (June to September), i.e. glaciers in XM are summer-accumulation type glaciers (Wang et al., 2003; Xie et al., 2000) and no obvious glacier mass change occurs during the winter months (Liu et al., 2019). Consequently, we assumed that no seasonal variation occurred between October and December in our study.

### **3.2 ASTER**

The ASTER sensor onboard the TERRA satellite platform provides a stereo pair generated by nadir-looking (3N,  $0.76-0.86 \mu\text{m}$ ) and backwards-looking (3B,  $27.7^\circ$  off-nadir) cameras with a base-to-height ratio of approximately 0.6. This value is close to ideal for generating DEMs with a variety of terrain conditions via automated techniques (Kamp et al., 2003). We used the AST14DMO products available at the EARTHDATA website (<https://search.earthdata.nasa.gov/search>, Table S1). This product has been derived from the raw ASTER data by the Land Processes Distributed Active Archive Centre using orbital ancillary data, without ground control points (GCPs). ASTER DEMs for 2014 and 2018 were also used in surging glacier analysis.

### **3.3 TerraSAR-X/TanDEM-X**

The TerraSAR-X was launched in June 2007 followed by its twin satellite, the TanDEM-X, in June 2010. The two satellites fly in a close orbital formation and act as a flexible baseline configuration (Krieger et al., 2007). Five pairs of TerraSAR-X/TanDEM-X (TSX/TDX) data in the experimental co-registered single look slant range complex (CoSSC) format acquired in the bistatic InSAR stripmap mode were employed in our study (Table 1). The CoSSC product was focused and co-registered at the TanDEM-X Processing and Archiving Facility using an integrated TanDEM processor. GAMMA SAR and interferometric processing software were used to process the CoSS product (Neckel et al., 2013). There are two methods for

calculating the elevation change when employing TSX/TDX and SRTM DEM. The first method is differential interferometric SAR (D-InSAR) and the second method is DEM differencing. For the bistatic mode, neither the deformation nor the atmospheric delay phase was included in the interferogram and the phase resulting from noise was also ignored.

The SRTM 1 and TSX/TDX were co-registered before constructing the differential interferogram. This required establishing an initial look-up table based on the relationship between the map coordinates of the SRTM 1 DEM and the SAR geometry of the TSX/TDX master file. The offsets between the master image and the simulated intensity image of the SRTM 1 DEM used an optimisation of the simulated SAR images by employing GAMMA's *offset\_pwrn* module. The SRTM 1 DEM was then transformed into a SAR geometry for the TSX/TDX master image. The simulated interferometric phase ( $\Delta\phi_{TSX/TDX}$ ) from the SRTM 1 DEM ( $\Delta\phi_{SRTM}$ ) was subtracted from the interferometric phase of the TSX/TDX data. The D-InSAR phase ( $\Delta\phi'_{diff}$ ) can be obtained from Eq. (1):

$$\Delta\phi'_{diff} = \Delta\phi_{TSX/TDX} - \Delta\phi_{SRTM} \quad (1)$$

The differential interferogram was filtered using an adaptive filtering approach. The flattened differential interferogram was unwrapped using the minimum cost flow algorithm (Costantini, 1998). The areas of layover and shadow with low coherence ( $< 0.3$ ) were masked out during the unwrapping processing. The unwrapped differential phases were converted to absolute differential heights using the calculated phase-to-height sensitivity. The differential interference uncertainty caused by baseline errors was regarded as a systematic error. A two-dimensional first-order polynomial fit for the non-glacial regions was used to remove the residuals in the glacial regions. Finally, a map with a spatial resolution of 12 m from the SAR coordinates was geocoded to the geographic coordinates using a refined look-up table. During the above process, the elevation difference between SRTM and TSX/TDX was derived directly from D-InSAR. The TSX/TDX DEM was geocoded to the geographic coordinates with a grid posting of one arc second using the refined geocoding lookup table created above, and TSX/TDX DEM was produced. We calculated the DEM difference using this DEM that was compared to TOPO.

### 3.2.4 SRTM and C-band Radar penetration

The SRTM DEM were was acquired from interferometry of C-band and X-band radar from the 11 to 22 of February 2000.

These data can often be seen as are representative of the glacier surface at the end of the 1999 ablation period with slight seasonal variances (Gardelle et al., 2013). The 1" C band DEM (SRTM 1) and the 3" C-band DEM (SRTM 3) are freely available and cover most of the globe. The accuracy of the SRTM is specified as 16 m with a 90% confidence level and varies according to the region (Berthier et al., 2006). The X-band SAR system has a narrower swath width than that of the C-band SAR, and, unfortunately, we could not access any X-band SRTM DEM data in our study area. Therefore, we used the SRTM C-band DEM at EGM96 orthometric heights with a 30 m pixel resolution (SRTM 1) in our study. When the SRTM C-band DEM was used in D-InSAR or DEM differencing with TerraSAR-X/TanDEM-X, which has an X-band SAR system,

设置了格式: 字体: (中文) Times New Roman

the results were directly corrected by the difference between the SRTM C-band and X band DEM, assuming that no seasonal variation occurred between February and April when there was little snowfall and no obvious melt (Xie et al., 2000).

However, ~~the~~ The penetration of the C-band radar into snow and ice ~~needs to~~ must be considered when assessing changes in the glacier elevation ~~using~~ determined by the difference between the SRTM C-band DEM and TOPO DEM (Gardelle et al.,

2012a). It is difficult to estimate exactly the penetration depth of the C-band radar into snow and ice for XM glaciers. There are three methods for evaluating the C-band radar penetration. The first method is by comparison between the SRTM C-band and X-band assuming that the penetration depth of the X-band is negligible (cf. Gardelle et al., 2012a). Several studies have reported a penetration depth of 2.1–4.7 m for a radar beam at ~10 GHz targeting an Antarctic ice sheet and showed that the penetration depth varies with the water content of the surface snow cover (Davis and Poznyak, 1993; Surdyk, 2002).

Glaciers in our study area have higher temperatures and more snow moisture than those of the Antarctic ice sheet. Besides, the glacier surface elevation of SRTM-C acquired in mid-February 2000 roughly refers to the state of glaciers at the end of the ablation period for 1999 in our study. We assumed that the slight penetration of SRTM-X into the snow and ice was offset by the slight seasonal change caused by the time interval (from the end of the ablation period for 1999 to mid-February 2000). Consequently, this method was appropriate for our study because of the assumption that the effect of the

slight penetration of the X-band is negligible compared to other confounding factors. ~~The X-band penetration depth is generally negligible, and Zhou et al. (2019) assumed that the impact of the X-band penetration depth is not sufficient to subvert the geodetic mass balance in our study region. Thus, we estimated the C-band penetration by comparing the SRTM C-band with the SRTM X-band DEM (cf. Gardelle et al., 2012a) in two regions near our study region (northeast by 45 km and southeast by 25 km) where the glaciers are at an elevation of 4930–5950 m a.s.l.. Nearly 92% of the glacial region in the XM are in this elevation range. We also estimated the penetration for higher than 5,950 m a.s.l. or lower than 4,930 m a.s.l. using the observed linear trend (Fig. S1).~~ The second method follows the methodology described by Wang and Kääb (2015). We linearly extrapolated the time series of the elevation from ASTER DEMs (AST14DMO products, Table S1), which was corrected by three-dimensional (3-D) coregistration (Nuth and Kääb, 2011) using SRTM DEM as the reference DEM off-glacier, to reconstruct the glacier topography in mid-February 2000. Then, the penetration depth of the C-band radar signal

over XM glaciers was generated by subtracting the SRTM DEM from this reconstructed DEM (Berthier et al., 2016). The third method is the comparison between ICESat GLA 14 footprints from 2003 to 2004 and SRTM DEM as described by Kääb et al. (2012). We used the elevation change rate between the footprints acquired in 2003 and 2004 to linearly extrapolate to mid-February 2000. These three methods have their respective advantages and disadvantages. ~~Zhou et al. (2019) Among them, the first one ignores the X-band radar penetration, and the second one does not have good performance in accumulated areas such as glaciers owing to image matching failure when clouds, shadow, and fresh snow coverage are present, and the third one has a very large uncertainty because of the large footprint sizes and insufficient spatial sampling of~~

the ICESat measurements. We compared these results with Zhou et al. (2019) and found that these results had little difference, especially that the result of the first method was close to the third and Zhou et al.'s (Table 2). The result of the second method was slightly larger than that of the first, which might be owing to the X band radar penetration. In our study, the SRTM elevation roughly referred to the state of glaciers at the end of the ablation period for 1999, and thus the slight X-band radar penetration could be offset by the slight seasonal change. There are too many data voids (~40%) in the results of the second method and the insufficient spatial sampling of the ICESat measurements in the third method. Thus, we used the first method to estimate the C-band radar penetration. Thus, we used the first method to estimate the C-band penetration by comparing the SRTM-C band with the SRTM-X band DEM (cf. Gardelle et al., 2012a) in two regions near our study region (northeast by 45 km and southeast by 25 km) where the glaciers are at an elevation of 4930–5950 m a.s.l. Nearly 92% of the glacial region in the XM is in this elevation range. We also estimated the penetration for higher than 5950 m a.s.l. or lower than 4950 m a.s.l. using the observed value for 5950 m a.s.l. and 4950 m a.s.l. (Fig. 2).

### 3.3 TerraSAR-X/TanDEM-X

The TerraSAR-X was launched in June 2007 followed by its twin satellite, the TanDEM-X, in June 2010. The two satellites fly in a close orbital formation to act as a flexible baseline configuration (Krieger et al., 2007). Five pairs of TerraSAR-X/TanDEM-X (TSX/TDX) data in the experimental Co-registered Single-look Slant-range Complex (CoSSC) format acquired in the bistatic InSAR stripmap mode were employed in our study (Table 1). The CoSSC product was focused and co-registered at the TanDEM-X Processing and Archiving Facility (PAF) using the integrated TanDEM processor. The GAMMA SAR and interferometric processing software were used to process the CoSS product (Neckel et al., 2013). In our study, the DEM from the TSX/TDX (TSX/TDX-DEM) interferogram was calculated, and changes to the glacier elevation between the TSX/TDX and SRTM were determined using differential SAR interferometry (D-InSAR). For the bistatic mode, neither the deformation nor the atmospheric delay phase was included in the interferogram, and the phase resulting from noise was also be ignored.

The SRTM-1 and TSX/TDX were co-registered before constructing the differential interferogram. This required establishing an initial look-up table based on the relationship between the map coordinates of the SRTM-1 DEM and the SAR geometry of the TSX/TDX master file. The offsets between the master image and the simulated intensity image of the SRTM-1 DEM used an optimization of the simulated SAR images by employing GAMMA's *offset\_pwm* module. The SRTM-1 DEM was then transformed into a SAR geometry for the TSX/TDX master image. The simulated interferometric phase ( $\Delta\phi_{TSX/TDX}$ ) from the SRTM-1 DEM ( $\Delta\phi_{SRTM}$ ) was subtracted from the interferometric phase of the TSX/TDX data. The D-InSAR phase ( $\Delta\phi'_{diff}$ ) can be obtained from Eq. (1):

$$\Delta\phi'_{diff} = \Delta\phi_{TSX/TDX} - \Delta\phi_{SRTM}, \quad (1)$$

设置了格式

设置了格式: 字体颜色: 红色

The differential interferogram was filtered using an adaptive filtering approach. The flattened differential interferogram was unwrapped using the Minimum Cost Flow (MCF) algorithm (Costantini, 1998). The areas of layover and shadow with low coherence ( $<0.3$ ) were masked out during the unwrapping processing. The unwrapped differential phases were converted to absolute differential heights using the calculated phase-to-height sensitivity. The differential interference uncertainty caused by baseline errors can be regarded as a systematic error. A two-dimensional first-order polynomial fit for the non-glacial regions was used to remove the residuals in the glacial regions. Finally, a map with a spatial resolution of 12 m from the SAR coordinates was geocoded to geographic coordinates using a refined look-up table.

### 3.4 ASTER

The ASTER sensor onboard the TERRA satellite platform provides a stereo pair generated by nadir-looking (3N, 0.76–0.86  $\mu\text{m}$ ) and backward-looking (3B, 27.7° off-nadir) cameras with a base-to-height (B/H) ratio of approximately 0.6. This value is close to ideal for generating DEMs with a variety of terrain conditions via automated techniques (Kamp et al., 2003). In this study, the ASTER DEMs (Table 1), which were generated using the DEM Extraction Model from the ENVI 5.0 software, were used in the glacier surge analysis.

### 3.5 Global Land Ice Velocity Extraction from Landsat 8 (GoLIVE) data Glacier velocity data

To investigate the dynamic behaviour of the surging glacier, we used the glacier velocity acquired from the Inter-Mission Time Series of Land Ice Velocity and Elevation (ITS LIVE) and the Global Land Ice Velocity Extraction from Landsat 8 (GoLIVE) dataset. In addition, we supplemented some data from 2008 to 2009 using ENVI add-on COSI-Corr derived from Landsat TM images. Landsat level 1T data were assumed to be quasi-coregistered due to the same sets of GCPs and vertical references used for orthorectification (Shangguan et al., 2015). We selected a signal-to-noise ratio  $> 0.9$  to filter obvious

outliers and errors caused by clouds, and topography, and low image contrast was removed from the matching result. The ITS LIVE data product is a set of regional compilations of annual mean surface velocities for major glacier-covered regions, spanning the period from 1985 to 2018, and is subject to image availability and quality. Surface velocities were derived from Landsat 4, 5, 7, and 8 imagery using the auto-RIFT feature tracking processing chain described in Gardner et al. (2018). Data scarcity and/or low radiometric quality were significant limiting factors for many regions in the earlier product years. Annual coverage is nearly complete for the years following the Landsat 8 launch in 2013.

The Global Land Ice Velocity Extraction from Landsat 8 (GoLIVE) data set is a compilation of ice velocities derived from the cross-correlation of pixel positions in pairs of panchromatic Landsat 8 images acquired from May 2013 to the present (Fahnestock et al., 2016). We considered only the velocities of the peak correlation values ( $\text{corr}$ )  $>0.4$  and the differences in correlation values between the primary and secondary peaks ( $\text{del\_corr}$ )  $<0.3$  (Sam et al., 2018). We calculated the mean or

maximum velocities for all ~~the~~ velocity rasters over each of the different years. We then discarded any annual average velocity pixels that were over 1 standard deviation from the mean velocity values.

### 3.6 Glacier boundary mapping, ~~and the calculation of the area change~~changing and uncertainty

The glacier boundaries ~~from of~~ 1970/71 were derived from the first CGI, which was inventoried using topographic maps and verified using aerial and Landsat MSS images. The glacier boundaries ~~from of~~ 2000, 2013 and 2018 were digitised manually from Landsat images using the same method as ~~that for~~ the second CGI processing (Guo et al., 2015). We also checked the glacier boundaries by cross-checking with Google Earth imagery.

The uncertainty in determining glacier boundaries ( $E_a$ ) was estimated using a buffer of 13.5 m for the topographic maps with a 1:~~100-100~~,000 scale and half a pixel for the Landsat images (Wei et al., 2014). The uncertainty of the glacier area change

( $E_{ac}$ ) was calculated using Eq. (2):

$$E_{ac} = \sqrt{E_{a1}^2 + E_{a2}^2}, \quad (2)$$

where  $E_{a1}$  and  $E_{a2}$  represent the uncertainties of the glacier areas for the two different periods.

### 3.7 Glacier length

In ~~this-the present~~ study, we estimated the glacier lengths by generating glacier centrelines using an automated method. This approach was based on the glacier axis as derived from the glacier morphology, which requires glacier outlines and DEMs as the inputs (Yao et al., 2015). The glacier centreline was derived from the SRTM DEM and glacier outline with the largest area. We split the glacier centreline with the glacier outlines in the different periods and calculated the associated glacier lengths.

Similar to the uncertainty of glacier boundaries, the uncertainty of glacier lengths was also estimated using a buffer of 13.5 m for the topographic maps with a 1:100,000 scale and half a pixel for the Landsat images. The final uncertainty was also calculated ~~with-using~~ Eq. (2), where  $E_{ac}$  represents the uncertainty in the changes of the glacier lengths and  $E_{a1}$  and  $E_{a2}$  represent the uncertainties of the glacier lengths from two different times.

### 3.8 Glacier elevation changes, mass balance and uncertainty

Changes in glacier elevation from 1999 to 2011/12 were calculated using the D-InSAR based on the TSX/TDX and SRTM C-band (see Section 3.3). Changes in the glacier elevation from 1970/71 to 1999 and from 1970/71 to 2011/12 were calculated by taking the differences between the DEMs (~~Nuth and Kääb, 2011~~) for the TOPO DEM, SRTM and TSX/TDX DEM. All DEMs were resampled to the same spatial resolution (30 m). Before the DEM differencing, the DEMs were corrected for planimetric and altimetric shifts (Nuth and Kääb, 2011) using the TOPO DEM as a reference. Then, the curvature bias (Gardelle et al., 2012a) in the glacial region was corrected by fitting sixth-order polynomials to the elevation

differences for the non-glacial regions. We considered only the elevation differences between  $\pm 100$  m over the stable region with slopes ranging from  $5^\circ$  ~~and to~~  $75^\circ$  and excluding glaciers and water bodies in the ~~co-registered-registered~~ and bias corrected DEMs. After the adjustments (Fig. S1), an elevation difference map of off-glaciers indicated a local random noise; however, at length scales of a few kilometres, the elevation differences were small, with the mean elevation difference of the

5 total region less than 0.5 m (Table 3).

The geodetic mass balance (m w.e.  $a^{-1}$ ) was calculated using the following equation (Fischer et al., 2015):

$$\dot{B} = \frac{\overline{\Delta z} \cdot A_l \cdot f_m}{\bar{A} \cdot \Delta t} \quad (3)$$

where  $\overline{\Delta z}$  is the average elevation differences within the perimeter covered by an individual glacier in a larger extent of two periods. In this case, the larger glacier extent ensured the mass change results were not affected by glaciers advancing or

10 retreating.  $A_l$  is the glacier area when covered in a larger extent.  $\bar{A}$  is the average area between two periods calculated as  $(A_{t1} + A_{t2})/2$  and  $\Delta t$  is the length of the observation period ( $t_2 - t_1$ ) in years. Fischer et al. (2015)  $f_m$  is a conversion factor (without units) used to transform glacier elevation change into mass change and is set as a constant of 0.85 corresponding to a density of volume change of  $850 \pm 60 \text{ kg m}^{-3}$ . Changes in the glacier mass were calculated based on variations in the glacier surface elevation using an assumption or model for the density. We approximated the density as  $850 \pm 60 \text{ kg m}^{-3}$  as a

15 reasonable and widely used assumption over a longer time-periods (Huss, 2013).

Under ideal circumstances, there would be no elevation difference in the stable region after the above adjustments. However, the residual errors (Fig. S1-S6 and Table 3) still existed in our results and caused uncertainty for the elevation change of the glacial region. Therefore, the ~~The~~ uncertainty in the differences of the glacier elevation ( $E_{\Delta H_i}$ ) was ~~was~~ estimated using the mean elevation difference ( $E_{med}$ ) and the standard deviation ( $\sigma$ ) of the ~~stable-off-glacier region. We calculated the differences~~

20 of the glacier elevation for each altitude band (50 m,  $E_{\Delta H_i}$ ), which excluded glaciers and water bodies:

$$E_{\Delta H_i} = \sqrt{E_{med_i}^2 + \sigma \sigma_i^2 / N_{eff_i}} \quad (34)$$

$$N_{eff_i} = N_{tot_i} \cdot PS / 2d \quad (45)$$

where  $E_{med_i}$  and  $\sigma_i$  are the mean elevation difference and the standard deviation for each altitude band, respectively.  $N_{eff_i}$  is the effective number of observations at off-glacier region, i.e. the number of included pixels, and is calculated using the total

25 number of observations ( $N_{tot_i}$ ) for each altitude band, the pixel size ( $PS$ , 30 m) and  $d$ , the distance for the spatial autocorrelation of the elevation change maps (1410 m) was determined using Moran's I autocorrelation index for the elevation differences of ~~non-glacierized~~ off-glacier region (Bolch et al., 2011; Gardelle et al., 2013). ~~The~~ The overall uncertainty of the DEM difference ~~is~~ was ~~calculated by the glacier area weighted average of  $E_{\Delta H_i}$  for each altitude band, as weighted by the glacier hypsometry.~~

30 The uncertainty of the glacier boundaries ( $E_a$ ) should be considered in the mass balance estimation. The glacier outlines were used as they have a larger extent ~~in~~ during the investigated period. The uncertainty in ~~the~~ radar penetration ( $E_p$ ) ~~also~~ should

设置了格式: 字体: (中文) Times New Roman

设置了格式: 上标

设置了格式: 字体: 倾斜

设置了格式: 下标

设置了格式: 下标

设置了格式: 下标

设置了格式: 字体: 倾斜

设置了格式: 字体: 倾斜, 下标

设置了格式: 字体: (中文) 宋体, (中文) 中文(中国)

设置了格式: 下标

设置了格式: 字体: 非倾斜

设置了格式: 字体: 非倾斜

设置了格式: 字体: 倾斜

设置了格式: 字体: (中文) 宋体

also be considered ~~in during~~ the mass balance estimation. ~~However, it is difficult to understand this uncertainty.~~ We used the uncertainty in the DEM difference between the SRTM-X and SRTM-C using Formula (34) to represent  $E_p$ , and the results revealed an uncertainty of 1.9 m. ~~The radar penetration accuracy includes the uncertainty of the differences between SRTM-X and C and the possible slight penetration of the X-band radar beam. However, it was impossible to evaluate the radar~~  
 5 ~~penetration accuracy. It was assumed that the possible slight penetration of the X-band radar beam was within this uncertainty range.~~ Finally, the uncertainty of the volume to mass conversion should also be considered to calculate the final uncertainty ( $E_m$  of  $\pm 60 \text{ kg m}^{-3}$  for the elevation change to mass change) (Huss, 2013):

$$E = \sqrt{E_{\Delta H}^2 + \left(\frac{\Delta H \cdot E_m}{S}\right)^2 + E_p^2 + \left(\frac{\Delta H \cdot E_m}{\rho}\right)^2}, \quad (56)$$

where  $S$  represents the glacier area and  $\rho$  represents ~~the~~ ice density.

## 10 4 Results

### 4.1 Glacier area and length changes

There were 136 glaciers in XM with a total area of  $641.2 \pm 7.7 \text{ km}^2$  in 1970/71. ~~The glaciers are primarily located in the southern and northern slopes (Fig. 2), and n~~ Nearly 89% of the glacier areas ~~lay were~~ between 5,100–5,900 m a.s.l. (Fig. 33). The maximum elevation of the glaciers at Xinqingfeng (6,821 m a.s.l.) ~~is was~~ higher than ~~that~~ at Malan (6013 m a.s.l.), and  
 15 the mean median elevation (5,552 m a.s.l. in 1970/71, 5,560 m a.s.l. in 2018) ~~is was likewise also higher than in Malan~~ (5,525 m a.s.l. in 1970/71, and 5,533 m a.s.l. in 2018).

The total glacier area ~~insignificantly~~ decreased by  $27.4 \pm 8.9 \text{ km}^2$  ( $4.3 \pm 1.4\%$ ) or  $0.09 \pm 0.03\% \text{ a}^{-1}$  from 1970/71 to 2018. The glacier area only decreased by  $0.01 \pm 0.0320\% \text{ a}^{-1}$  from 2013 to 2018, but it decreased by  $0.03 \pm 0.0312\% \text{ a}^{-1}$  and  $0.13 \pm 0.0306\% \text{ a}^{-1}$  for the periods from 2000–~~to~~ 2013 and 1970/71–~~to~~ 2000, respectively. The glacier area at Xinqingfeng  
 20 decreased by  $0.08 \pm 0.03\% \text{ a}^{-1}$ , while at Malan it decreased by  $0.11 \pm 0.03\% \text{ a}^{-1}$ . The glaciers showed heterogeneous variations with some ~~advanced–advancing~~ or ~~surged–surging~~ (Tables 2–4 and 35). Overall, the shrinkage speed of the glacier area decreased after 2000 and the glacier area was stable after 2013, which can be mainly attributed to the heterogeneous variations with some of the glaciers advancing or surging (Tables 2–4 and 35).

~~There were no observed changes that occurred for the glaciers located above 5,600 m a.s.l. (Fig. 3). The glaciers in the~~  
 25 ~~western and northeastern slopes experienced the most shrinkage at Xinqingfeng (Fig. 4). However, our result showed there was little change in the glacier area of the north-western slope as a result of the advancing West Monumaha Glacier (No. 2). We also found that glaciers located on the northern slope experienced less shrinkage (Fig. 4) as a result of the advancement of Glacier No. 1. Although the Monumaha Glacier (No. 4) facing the eastern slope advanced from 2000–2018, it also experienced the most area shrinkage (Tables 2 and 3). Both Glacier Nos. 6 and 7 facing the southern slope experienced area~~  
 30 ~~loss over the entire investigated period. Thus, glaciers facing eastern and southern slopes experienced more shrinkage than~~

those facing the northern and western slopes (Fig. 4). The glaciers along the eastern slope experienced the most shrinkage at Malan while the northeastern glaciers were ranked second (Fig. 4). It is noted that most of the glaciers are located on the northern and southern slopes at Malan (Fig. 2). However, glaciers facing the northern slope lost more area (Fig. 4).

#### 4.2 Glacier mass changes

- 5 The average elevation decrease of glaciers in Xinqingfeng was  $-3.50 \pm 2.17$  m, resulting in an average glacier mass loss of  $-0.22 \pm 0.17$  m w.e.  $a^{-1}$  from between 1999- and 2011/12. Glaciers exhibited heterogeneous mass changes. The highest mass loss was observed for the northwestern, northern, northeastern and eastern slopes where the mass budgets were in the range of  $-0.25 \pm 0.17$  to  $0.33 \pm 0.17$  m w.e.  $a^{-1}$ . In particular, the glaciers with a north-western aspect showed a relatively strong mass loss at Xinqingfeng from 1999-2011/12 (Fig. 6). West Monumaha Glacier, which contributes to ~63% of the ice cover in the north-western slope, began to surge or advance after 1998, and experienced a significant lowering on the tongue, resulting in a net mass loss from 1999- to 2011 (Fig. 54). It is noted that most of the glaciers are located on the northern, northwestern, eastern and southern slopes at Xinqingfeng (Fig. 2). However, the glaciers facing the southern slope showed only a minimal mass loss. Among these glaciers, Glacier Nos. 5-7 had mass gains of  $0.01 \pm 0.16$  to  $0.10 \pm 0.16$  w.e.  $a^{-1}$  (Fig. 5-4 and Table 46).
- 15 The glaciers at Malan decreased in elevation from 1970- to 2012 with an average of thinning of  $10.72 \pm 0.91$  m, resulting in an average mass loss of  $0.22 \pm 0.02$  m w.e.  $a^{-1}$ . The rate of mass loss for these glaciers increased from  $-0.19 \pm 0.14$  m w.e.  $a^{-1}$  from between 1970- and 1999 to  $-0.29 \pm 0.17$  m w.e.  $a^{-1}$  from between 1999 and -2012. The glaciers at different slopes showed similar mass losses from 1999-2011/12 (Fig. 6). However, glaciers facing the northern slope showed a greater mass loss budget than the southern slope from 1970-1999 and from 1970-2011/12 (Fig. 7). This is because Glacier Nos. 14 and 15 at the southern slope experienced a slightly positive mass budget from 1970- to 1999.

Our results (Fig. 5) indicate that ice loss mainly occurred below 5600 m a.s.l., which is the reason for glacier area loss below 5600 m a.s.l. The ice thickness thinning rate below 5600 m a.s.l. between 1999 and 2012 was higher than that between 1970 and 1999. However, ice thickness thickened obviously below 5000 m a.s.l. during 1999-2012, which was caused by some glacier surging.

#### 4.3 Glacier velocity from 2013-2018

The average velocity for the glaciers in XM from 2013-2018 was  $0.16$  m  $d^{-1}$ , and the average velocity for glaciers at Xinqingfeng ( $0.17$  m  $d^{-1}$ ) was higher than at Malan ( $0.14$  m  $d^{-1}$ ). This is because there is a higher average slope for the glaciers at Xinqingfeng than at Malan. There were nearly no changes in the glacier velocities except for Monumaha Glacier and Zu Glacier (No. 6) from 2013-2018.

The Monuomaha Glacier experienced a larger velocity ( $0.8 \text{ m d}^{-1}$ ) from 2013–2016, and then returned back to its normal levels from 2017–2018 (Figs. 8a and 8b). The maximum velocity of Monuomaha Glacier was  $1.8 \text{ m d}^{-1}$ . We found that Monuomaha Glacier showed significant thickening within its tongues from 1999–2018, resulting in an advancing with from 2010–2016, which is typical for a surge (Fig. 8c). However, its tongues also showed a significant thinning and melted completely, resulting in a retreating from 1971–1999 (Fig. 8d).

The Zu Glacier showed a slightly higher velocity from 2013–2015 (Figs. 9a and 9b), and there was a slight thickening in its lower parts from 2011–2014 (Fig. 9c). Moreover, a significant thickening in its tongue and thinning in its upper parts were found from 2014–2018. We assert that this behaviour is indicative of a surge-type glacier. A slight thickening in the upper parts was also found from 1999–2011. Our results (Table 4) suggest that the Zu Glacier experienced a positive mass balance from 1999–2011. Thus, its surge initiation could have been produced from 1999–2012. Similarly, the glacier also surged before 1999 due to a thickening in the tongue and thinning in the upper parts. However, we could not determine the exact timing of this surge due to a lack of data. A significant thinning in its tongue from 1999–2011 confirmed that the active surge event (1971–1999) transferred ice mass to lower elevations where it was more prone to melting during this period.

#### 4.4.3 Glacier advance and surge

A minimum of seven glaciers at Xinqingfeng and Malan showed heterogeneous variations with either surging or advancing at during different periods (Table 57). The eastern branch of Glacier No. 1 advanced  $278.480 \pm 24.20 \text{ m}$  and converged into the West Monuomaha Glacier (No.2) from 1971–to 1987 at the same time that the West Monuomaha Glacier was retreating. Glacier No. 1 then continued to advance  $50.9 \pm 21.20 \text{ m}$  from 1989–to 1999. The average advance rate for Glacier No. 1 from 1971–1999 was  $11.8 \text{ m a}^{-1}$ . The West Monuomaha Glacier then advanced  $1,200 \pm 21.2 \text{ m}$  from 1987–1989 and continued to advanced  $256 \pm 21.2 \text{ m}$  from 1990–1998. The average advance rate for the West Monuomaha Glacier for this entire period from during 1987–1998 was  $132.40 \pm 10 \text{ m a}^{-1}$ , where the peak value was  $600 \pm 10 \text{ m a}^{-1}$  during from 1987–1989. The West Monuomaha Glacier had a higher velocity during 1986–1997 with a maximum velocity of  $150 \text{ m a}^{-1}$  based on the time series data for glacier velocities derived from ITS LIVE (Fig. 6a). However, some data was missing between 1987 and 1989. According to advancing magnitude (1200 m) during 1987–1989, we assumed that the West Monuomaha Glacier had a much higher velocity with surging during 1987–1989. We found this glacier had a higher velocity from 12 October, 1987 to 29 November, 1987 with a maximum velocity of  $5.6 \text{ m d}^{-1}$  (Fig. 6b), which may be the peak value from 1986 to 2001. Consequently, the West Monuomaha Glacier was a surging glacier with a higher velocity from 1986 (or before 1986) to 2001.

The Monuomaha Glacier (No.4) also advanced  $1,164.00 \pm 46.820 \text{ m}$  from 2010–2016; however, it had an overall retreat of  $2,546.850 \pm 20.2 \text{ m}$  over the entire period from 1970–to 2010. In fact, surge initiation of Monuomaha Glacier began in 2009 while the ice at the north side decreased.

The glacier ~~velocities-velocity from the Landsat dataset~~results (Fig. ~~S2gs. 7a and 7b~~) suggest that the Monuomaha Glacier could have been initiated at some point between February and March, 2009. ~~We also found that t~~The velocity of Monuomaha Glacier fell abruptly in January, 2017 and then ~~likely~~returned to normal levels by ~~March, 2017~~2018 based on the time series data for glacier velocities derived from GoLIVE ~~and ITS LIVE~~. ~~The Monuomaha Glacier experienced a~~  
5 ~~significant thickening in the lower part and a significant lowering in the higher part during 1999-2011 and 2011-2014 (the~~  
~~difference between ASTER and TSX/TDX-X, Fig. 7c), which is the signal for surging. The Monuomaha Glacier showed~~  
~~terminus thickening between 2014 and 2018 (the difference between ASTER DEMs), and there were some unreasonable~~  
~~data on the accumulation zone due to higher uncertainty with DEMs derived from optical images for the fresh snow cover~~  
~~region.~~

10 The Zu Glacier (No.6) ~~advancedadvanced~~  $46.050 \pm 10.6$  m from 2014 to 2016 ~~and also experienced a higher velocity from~~  
~~2013 to 2015 (Fig. 8). The Zu Glacier showed a significant thickening in the lower part and a significant lowering in the~~  
~~higher part during 2014–2018 (Fig. 8c). Combined with the shape of the terminus of the Zu Glacier (Fig. 8d), this glacier~~  
~~might be surging from 2014 to 2016, with this glacier retaining a relatively high speed until now.:~~

Glacier No. 7 ~~advancedadvanced~~  $40.8 \pm 20.2$  m from 1986 to 1989, and then ~~suddenly advancedadvanced~~ ~~suddenly~~ by  
15 ~~11097.8  $\pm$  16.820~~ m from 2009–~~to~~ 2010. Glacier No. 8 ~~advancedadvanced~~  $432430.0 \pm 20.2$  m from 1970–~~to~~ 2000; however,  
we only know for certain that this glacier ~~advancedadvanced~~  $663.90 \pm 20.2$  m from 1970–~~to~~ 1986 and then retreated between  
1986 and 2018 ~~due to lack of data~~. Glacier No. 14 showed significant thickening and thinning within its tongues, ~~which is~~  
~~typical of a surge (Fig. 4b), over the entire study period between 1999 and 2012~~. We found that Glacier No. 14  
~~advancedadvanced~~  $260.5 \pm 16.820$  m from 2007–~~to~~ 2012 ~~but, however, it~~ retreated  $954.00 \pm 20.2$  m ~~from between 1971- and~~  
20 ~~2007. Thus, Glacier No. 14 might be a surging glacier.~~

The latest surge-type index from Mukherjee et al. (2018) ~~would-classified~~ the West Monuomaha Glacier, Monuomaha  
Glacier, and Glacier No.7 as surge-type glaciers ( $>100 \text{ m a}^{-1}$ ). Our results showed that the Monuomaha Glacier and Glacier  
Nos. 7, 8, and 14 showed significant thickening in their tongues and a significant lowering in their upper parts (Fig. ~~5b4b~~),  
~~and these glaciers might be surging glaciers. We confirmed that Glacier No. 14 surged as a consequence of its advance from~~  
25 ~~2007-2012~~. While Glacier No. 8 ~~is-was~~ considered a surge-type glacier with surging from 1999–~~to~~ 2011, it is unclear  
whether its advance from 1970–~~to~~ 1986 was caused by surging. In addition, we also found that Glacier No. 1 ~~is-was~~ likely a  
surge-type glacier ( $<100 \text{ m a}^{-1}$  and  $>10 \text{ m a}^{-1}$ ) (Mukherjee et al., 2018).

设置了格式: 上标

5 Discussion

5.1 Uncertainties

The uncertainties in the geodetic mass balance mainly resulted from the precision of the DEM acquisitions and processes, glacier boundaries and changes, seasonal variation, radar penetration depth and data voids. All DEMs and methods for acquisitions and processing we employed proved to be valuable for assessing geodetic glacier mass budgets and evaluating uncertainties in our study. Even if TOPO DEMs were produced and inspected in strict accordance with the photogrammetric Chinese National Standard (GB/T12343.1-2008, 2008), we assumed that low contrast surfaces affected the elevation in case of snow cover. Thus, we divided each glacier into an accumulation region and ablation region by mean median elevation. And we set the elevation of the accumulation regions to zero assuming only minor elevation changes for these areas. Then the difference between the results for mass change using this method and our results were less than 0.05 m w.e. a<sup>-1</sup>. This number was included in the uncertainty terms.

The uncertainty resulting from glacier boundaries was also evaluated in our study. However, the smallest glacier size inventoried in our study was 0.01 km<sup>2</sup>, which could create a 10% error in the estimation of the ice volume (Bahr and Radić, 2012). It was difficult to assess this error due to little knowledge of the amount, area, and specific mass balances of the smallest glaciers (including glaciers with area < 0.01 km<sup>2</sup>). Thus, we conservatively assumed that the underestimation made a 10% error in the loss of ice volume. Consequently, an error of approximately 0.02 m w.e. a<sup>-1</sup> was caused by the smallest glaciers. This number was also included in the uncertainty terms.(Fischer et al., 2015)

Seasonal variance caused by the difference between data acquisition times should be considered because geodetic measurements should show the mass balance corresponding to an integer number of balance years. For XM glaciers, most accumulating and melting occurred simultaneously during the summer (June to September). In addition, based on the extent of snow coverage on XM glacires from the Landsat images, we assumed that September was the end of the ablation period. Therefore, in our study, the correction of seasonal variation was set to zero, because no obvious glacier mass change occurred between the months of late winter and spring. Even so, we still conservatively assumed that the seasonal mass change was equal to the maximum net accumulation (603 mm w.e.) of the Malan ice core over the period from 1887 to 1998 (In fact, the average net accumulation of the Malan ice core over the period from 1887 to 1998 was only 186 mm w.e.). This value could create errors between 0.01 and 0.05 m w.e.a<sup>-1</sup> for the mass balances for the periods of 1970–1999, 1999–2012, and 1970–2012. The number was also included in the uncertainty terms. Xie et al. (2000)

One critical issue in our study was the unknown C-band and X-band radar penetration into snow and ice. We estimated the C-band radar penetration by comparing the SRTM C-band with the X-band DEM without considered X-band radar penetration. Because TSX/TDX and SRTM-X have the same band (X-band), and the seasonal variation could be ignored as above, it was unnecessary to consider additional X-band penetration when calculating the elevation change between

设置了格式: 上标

设置了格式: 上标

设置了格式: 上标

设置了格式: 上标

TSX/TDX DEM and SRTM-C DEM, even if the penetration depth of the X-band radar signal into the glacier surface was influenced by different seasons. Liu et al. (2019) found that the X-band penetration in January was  $0.61 \pm 0.06$  m higher than that in April over the Puruogangri ice field. We also assumed that the X-band penetration in February was  $0.61 \pm 0.06$  m higher than that in March and April over the XM glaciers, potentially creating errors of up to  $0.04 \text{ m w.e. a}^{-1}$  for the mass balances during 1999–2012. However, since additional X-band radar penetration was not considered, the penetration depth of the C-band radar we obtained was likely underestimated when calculating the elevation difference between TOPO DEM or TSX/TDX DEM and SRTM C-band DEM. Several studies have reported that the average penetration depth of the X-band radar could reach 2–4 m or less under dry-snow conditions over the accumulation region of glaciers in the Karakoram (Round et al., 2017) (Lambrecht et al., 2018) and Western Pamir (Lambrecht et al., 2018). However, the precipitation in this region is much less than that in the Karakoram and Western Pamir, especially during winter, and the thickness and extent of the dry snow might be much less than that in the Karakoram and Western Pamir. We conservatively assumed that the X-band radar depentration was 2 m, with the updated results only less negative by  $0.06 \text{ m w.e. a}^{-1}$  and  $0.04 \text{ m w.e. a}^{-1}$  than our results during 1970–1999 and 1970–2012, respectively. The number was also included in the uncertainty terms. Thus, the geodetic mass balance results over the long term were less affected by X-band penetration.

设置了格式: 字体: 非加粗, 上标

Another major uncertainty for the geodetic mass balance was caused by the lack of information in several data voids. Our elevation difference results did not exceed the range of  $\pm 100$ ; therefore, there were no data voids in the difference between TOPO and SRTM. The elevation difference in the areas of layover and shadow with low coherence ( $< 0.3$ ) for TSX/TDX was not accurate and was excluded in our study. Then, there were only a small data voids (approximately 1%) for the elevation difference between TOPO or SRTM and TSX/TDX. In the present study, we calculated the mean elevation difference of the nonvoid pixels without considering the data voids. Some methods can be used to fill the data voids. McNabb et al. (2019) split these methods into three general categories: constant interpolation, spatial interpolation, and hypsometric interpolation. In constant methods, the maximum, minimum, mean and median elevation changes observed in the same elevation bins regions are used to fill the voids and to evaluate the impact on the total glacier mass balance. In spatial interpolation, the raw DEM or elevation differences of the surrounding pixels are interpolated to fill the voids, and the average elevation difference according to the on-glacier pixels within a 1 km radius of the void pixel for each void pixel is calculated. In hypsometric methods, the mean elevation difference for each 50 m wide elevation bin is used to calculate the mass change by the glacier area of each elevation bin. The above different assumptions led to a variation of the mass balance of less than  $0.04 \text{ m w.e. a}^{-1}$ . The number was also included in the uncertainty terms.

设置了格式: 字体: 非加粗, 上标

设置了格式: 字体: 非加粗, 上标

#### 5.1.2 Glacier area changes

Our results showed a decrease in the glacier area at a rate of  $\sim 0.00\text{--}0.26\% \text{ a}^{-1}$  (with the exception of for Glacier Nos. 1, 2, and 8) from 1971–to 2018. These results are in agreement with other studies, proving that there are low rates of glacier

shrinkage in the ~~inner-Tibetan-Plateau~~ITP. For example, there was an 0.18% a<sup>-1</sup> shrinkage from the 1970s to 2009 for the drainage Basins of Ayakkum Lake (5Z11, basin code ~~of which we take~~ from CGI) and Hoh Xil Lake (5Z12), 0.17% a<sup>-1</sup> from 1976-~~to~~ 2013 for the Qaidam interior-drainage basin (5Y5), and 0.14 % a<sup>-1</sup> from 1976-~~to~~ 2013 for the Ayakkum ~~lake-Lake~~ interior-drainage basin (5Z1) (Wei et al., 2014; Ye et al., 2017).

5 Compared with the surrounding regions in the ~~Tibetan-Plateau~~ITP, the rate of glacier shrinkage in ~~the~~XM was very close to the western Kunlun Shan (0.1% a<sup>-1</sup> from 1970-2010) (Bao et al., 2015) and Kangzhag Ri (0.08% a<sup>-1</sup> from 1970-~~to~~ 2016) ~~to the west~~-(Zhang and Liu, 2018), was slightly lower than Geladandong (0.15% a<sup>-1</sup> ~~in-the~~from 1964-~~to~~ 2010) (Wang et al., 2013) to the south, and was significantly lower than Dongkemadi (0.26% a<sup>-1</sup> from 2000-2011) (Qiao, 2010) and Qilian Shan (0.39% a<sup>-1</sup> from 1956-~~to~~ 2010) (Sun et al., 2018) to the northeast, Bugyai Kangri (0.48% a<sup>-1</sup> from 1981-~~to~~ 2013) (Liu et al., 10 2015) to the southeast, and western Nyainqentanglha (0.62% a<sup>-1</sup> from 1970-~~to~~ 2014) (Wu et al., 2016) to the south. ~~Reductions to the glacier area showed a trend of low to high from the western to eastern and are consistent with the isothermal line trend (Xie et al., 2000), indicating that XM maybe a turning point in this trend.~~

### 5.2.3 Glacier mass changes

Our results for the mass changes of the glaciers at Xinqingfeng and Malan of  $-0.22 \pm 0.17$  m w.e. a<sup>-1</sup> and  $-0.29 \pm 0.17$  m w.e. a<sup>-1</sup>, respectively, from 1999-~~to~~ 2011 agree well with the results from Zhou et al. (2019) of  $-0.21 \pm 0.10$  m w.e. a<sup>-1</sup> and  $-0.22 \pm 0.10$  m w.e. a<sup>-1</sup> from 2000-~~to~~ 2016. Brun et al. (2017) reported that the global average mass loss was  $0.14 \pm 0.07$  m w.e. a<sup>-1</sup> from 2000-~~to~~ 2016 for glaciers in the ~~inner~~-ITP. We also estimated that there was a mass loss of 0.17 m w.e. a<sup>-1</sup> for the glaciers at XM based on the data from Brun et al. (2017) (Table 56), which agrees well with our study. However, Gardner et al. (2013) ~~also~~ found a  $-0.01 \pm 0.35$  m a<sup>-1</sup> elevation change for the glaciers of the ~~inner-Tibetan-Plateau~~ITP from 2003-~~to~~ 20 2009 using ICESat and SRTM. This deviation may be attributed to the different study periods and ~~the uncertain penetration of the SRTM C-band radar into the ice and snow extent~~. Neckel et al. (2014) determined that the average mass loss was  $0.77 \pm 0.35$  m w.e. a<sup>-1</sup> from 2003-~~to~~ 2009 for ~~the~~ glaciers in the Qilian Mountains and East Kunlun, which ~~are-were~~ included in our study region, as observed by ICESat GLAS. ~~Their estimated trend was significantly more negative than ours~~~~Their estimated trend is more significant than ours~~, which may be attributed to a different study extent and ~~time~~-period. These 25 results together prove that the very large ~~inner-Tibetan-Plateau~~ITP is an aggregation of climatically heterogeneous sub-regions that result in spatial variability in the glacier mass balance. Previous studies (Bao et al., 2015; Lin et al., 2017) have reported that the ~~west-West~~ Kunlun Shan and extended West Kunlun showed ~~ed~~ glacier mass gain from 2000. Zhang and Liu (2018) determined that glaciers in Kangzhag Ri, which are approximately 70 km west of XM, showed a positive mass balance ( $+0.16 \pm 0.02$  m w.e. a<sup>-1</sup>) from 1999 to 2012 using ASTER and SRTM. ~~This appears to suggest that~~~~Therefore~~, 30 KangzhagRi and XM are the transition zones from the west to the east regarding the mass balance distribution from positive to negative based on the data since 1999. ~~In addition, we compared three glacial clusters along approximately 35.5–36.5 °N,~~

from 87 °E to 91 °E (Ulugh Muztagh, Kangzhang Ri, and XM) using the results from Brun et al. (2017), which showed that the mass balance decreased from the west to east (Fig. 8a). We also calculated the mean median elevation, which was presumed to be at equilibrium-line altitude (ELA) such that the mass balance is zero at that elevation (Sakai et al., 2015), for three glacial regions (Fig. 8c) and showed the mean median elevation (or ELA) also showed a decrease from the west to the east. The other three glacial clusters (Zangsar Kangri, Purogangri, and Geladandong) along approximately 33–34.5 °N, from 85.3 °E to 91.5 °E also showed a similar trend (Figs. 8b and d). Because the mean median elevation (or ELA) is closely related to air temperature and precipitation (Sakai et al., 2015), different climate zones result in heterogeneity with the glacier mass balance. In XM, a local climatic zone, the area average mass balance was calculated with a mean median elevation interval of 50 m using our results from 1999 to 2012 (Fig. 9). The results showed that the glacier mass loss decreased with increasing mean median elevation. Glaciers with a mean median elevation below 5700 m a.s.l. had significantly more negative mass balance than glaciers above 5700 m a.s.l., because ice mass loss mainly occurred at low altitudes (Fig. 5). However, there were no obvious relationships between mass balance with mean median elevation for glaciers with a mean median elevation below 5700 m a.s.l. Thus, glaciers at XM were also significantly influenced by local heterogeneity of climate.

Most glaciers experienced similar mass budgets for the investigated periods at Malan. However, ~~it seems that~~ some glaciers had greater negative budgets after 1999, e.g., Malan experienced a slight mass gain before 1999 and a negative mass change after 1999. The global average mass change trend (more negative) ~~is was~~ in agreement with Bugyai Kangri, Dongkemadi and West Geladandong to the southeast of XM (Chen et al., 2017). However, this ~~is was~~ in contrast to Kangzhang Ri (Zhang and Liu, 2018); ~~and~~ Aru Co to (Zhang et al., 2018) to the west of XM, which showed more positive growth after a negative period. ~~This could be explained if XM was a turning point in the observed trends.~~ Glaciers to the west of XM showed ~~less a lower~~ mass loss or a mass gain trend after 1999, ~~but however~~, glaciers to the east showed a more negative change.

#### 5.3.4 Glacier advance and surge

Elevation profiles (Fig. 10) indicate that most of the surged or advanced glaciers have greater slopes over the accumulation area and gentler slopes over the ablation area. This is in accordance with the topographic features of surged glaciers that exhibit small slopes with velocities that are too low to remain in balance with the accumulation rate (Björnsson et al., 2003). Thus, surge is necessary to transport mass from the reservoir area down the glacier tongue to the terminus. Glacier Nos. 6–8 were nearly balanced from 1999–2012. These glaciers have relatively narrow width, so the mass transported from the reservoir area might be limited. As a result, these glaciers experience only small advances. Although the mass transported from higher to lower elevations was more vulnerable to increasing temperatures, the observed small ice mass losses have not been enough to result in a strong negative mass balance. However, others glacier with wider accumulation areas would

设置了格式: 字体: (中文) + 中文正文 (宋体), (中文) 中文(中国)

provide more ice mass to the terminus, which then results in a more negative mass balance. In contrast to the other glaciers, the Monumaha Glacier has a gentle accumulation area and a greater slope over the ablation area. Similarly, a gentle accumulation area results in smaller velocities to retain a greater ice mass with the accumulation, which prohibits the ice mass from transferring to the ablation area. Therefore, the terminus was illsupplied from the accumulation area and exhibited a sharp retreat from 1970-2010. Once the glacier surged, a significant amount of ice mass was transferred from the accumulation area to the terminus and the glacier advanced more because of the greater slope. However, the ice over the terminus with a greater slope and lower elevation could result in thinning and would be more vulnerable to increasing temperatures. Hence, the Monumaha Glacier showed a retreated for most of 1970 to 2010, but it could have surged before 1970. We also predicted that the Monumaha Glacier will retreat sharply again in the future.

Two surge models have been linked to a corresponding hypothesis relative to thermal-(Svalbard-type) or hydrological (Alaska-type) surge control (Falaschi et al., 2018; Quincey et al., 2015). Thermal control is characterized by an initiation phase that lasts several years before reaching a peak in the surge and a termination phase that consists of several years of deceleration following the surge peak (Clarke et al., 1984; Murray et al., 2000). These surges can begin or end at any seasonal time of year. A switch in basal thermal conditions has been identified as a surge mechanism for some polythermal glaciers, with surging occurring when cold basal conditions switch to temperate conditions (Clarke et al., 1984; Fowler et al., 2001; Murray et al., 2000). These surges can begin or end at any seasonal time of year. Hydrological control can explain surging for temperate glaciers and many polythermal glaciers that are already temperate at the base (Sevestre et al., 2015). The subglacial drainage system becomes inefficient during the winter months, increasing the subglacial water pressure and facilitating rapid sliding (Björnsson, 1998; Kamb et al., 1985). ThisHydrological control is characterized by the rapid acceleration and deceleration over a short time (i.e., days to weeks-long) and tends tois initiated during the winter months and terminated during the summer months when the subglacial drainage system becomes highly efficient (Burgess et al., 2012; Lingle and Fatland, 2003). The borehole temperature measurement results in the Malan Ice Caps showed that the ice temperature at a depth of 10 m was  $-6.5^{\circ}\text{C}$ , therefore, the glaciers in our study were attributed to the cold type. Our results showed that the Monumaha Glacier had a long duration active phase that lasted 8 years and may have begun and ended in the winter. We also estimated the contributions of the internal ice deformation  $u_d$  to the surface flow with a parallel-sided slab assumption with the plain strain approximation, as

$$u_d = \frac{2A}{n+1} (\rho g s \sin \alpha)^n H^{n+1}, \quad (6)$$

where A is strain rate factor at  $2.4 \times 10^{-24} \text{ s}^{-1} \text{ Pa}^{-3}$  (a conservative estimate),  $\rho$  is the ice density at  $900 \text{ kg m}^{-3}$ , n is Glen's exponent at 3, g is gravitational acceleration at  $9.8 \text{ m s}^{-2}$ ,  $\alpha$  is the slope, and H is the ice thickness (Round et al., 2017).

A constant glacier thickness of 150-190 m was assumed based on the volume estimation from the second CGI. Our results show a  $6.5^{\circ}$  surface slope over the glacier tongue in 2000, which would result in deformation velocities of around 0.05-0.13

设置了格式: 字体: (中文) + 中文正文 (宋体), (中文) 中文(中国)

$\text{m d}^{-1}$ . This estimate was close to the mean velocity of  $0.09 \text{ m d}^{-1}$  from Jun 15, 2008 to Feb 10, 2009 as observed from remote sensing data (Fig. S3). The glacier surged from Feb, 2009 with a mean glacier velocity over the glacier tongue reaching  $0.9 \text{ m d}^{-1}$  from Feb 10, 2009 to Mar 14, 2009 (Fig. S2) and increased to  $1.2 \text{ m d}^{-1}$  in April (Fig. S4) with a peak velocity of  $3.8 \text{ m d}^{-1}$  in November (Fig. S5). The glacier tongue velocity then reduced to  $0.4 \text{ m d}^{-1}$  from 17 March to 4 May, 2010 (Fig. S6).

5 The mean slope of the glacier tongue increased to  $12.3^\circ$  on 29, November, 2010, resulting in a deformation velocity of  $0.9 \text{ m d}^{-1}$ , which was close to the mean velocity observed from 17 March to 4 May, 2010. The velocities of the glacier tongue from 2013 to 2016 (Fig. 8) seem to be the same order of magnitude as the velocities through the internal deformation alone. Hence, it appears that the internal ice formation contributed significantly to the glacier tongue flow. This indicate that Thus, the Monumaha Glacier might be surge controlled via thermal mechanisms, where a switch from cold to temperate conditions

10 may have caused the surge onset in 2009. The West Monumaha Glacier and Zu Glacier also had a long duration for the active phase and might be the same surge control as the Monumaha Glacier. Under the colder and wetter climate that was recorded in the ice core of Malan ice cap from the late 1980s and into the 1990s (Wang, 2009; Wang et al., 2003), more snowfall may have occurred in the XM. In recent years, higher precipitation including snowfall has occurred in the XM (Fig. 10). Moreover, the Zu Glacier exhibited a positive mass balance ( $0.07 \pm 0.16 \text{ m w.e. a}^{-1}$ ), which might be attributed to the  
15 precipitation (snowfall) increases from 1999 to 2012 and then surging during 2014–2016. Therefore, we assumed that the build-up of ice from the accumulation of snowfall increasing in the reservoir area increased the driving stress, which led to higher ice creep rates and generated heat to produce meltwater, leading to reduced basal drag and faster sliding.

The West Monumaha Glacier surged from 1987–1989 and advanced from 1990–1998, but no advance or surge was found  
20 after 1999. Two advances occurred over a short time interval, which we assumed were in the same surge period and that the first period was during the peak of the surge. Our results show that the West Monumaha Glacier retreated from 1971–1986. Liu et al. (2004) also reported that this glacier retreated from 1971–1976 in response to the higher air temperatures from 1934–1976. Although our results show that Glacier No. 1, which is adjacent to the West Monumaha Glacier, experienced advancing from 1971–1986, it actually may have advanced from 1977–1987 after retreated from 1971–1976. Similarly,  
25 Glacier No. 1 advanced from 1989–1999. Thus, we assumed that Glacier No. 1 also surged from 1977 to 1987 and then decelerated until 1999, which is similar to the behaviour of the West Monumaha Glacier. These glaciers also fit the characteristics of thermal control, which began and ended over a long duration.

Glacier No. 7 was observed to advance from 1986–1989 and from 2009–2010, the latter of which we confirmed as being controlled by surging. If we assume that the first was also controlled by surging, the cycle (the active and quiescent phases)  
30 is only 10 years. However, as mention above, the cycles of Glacier No. 1, the West Monumaha Glacier and the Monumaha Glacier seem to be over a long time with a much longer active phase. Thus, it is hardly possible to precisely

determine the timing and duration of surge cycles due to deficiencies in the existing data. For each surging glacier, the active and quiescent phases tend to be of relatively constant length, resulting in a quasi-periodic cycle, although there are large variations in the cycle lengths between glaciers and between regions (Björnsson et al., 2003). For example, in Svalbard, which is surge-controlled via thermal mechanisms, the active phase of surging glaciers typically lasts for 4–10 years, compared with only 1–3 years for surging glaciers in north-western Alaska, Iceland and the Pamirs. The maximum ice velocities of the glaciers in Svalbard are comparatively low, ranging between 1.3 and 16 m d<sup>-1</sup>, compared with velocities of 50 m d<sup>-1</sup> as measured for the Variegated Glacier in Alaska (Benn and Evans, 2010). Our results also show that the longer active and maximum ice velocity of the Monumaha Glacier was similar to those at Svalbard. The quiescent phase is also relatively long for the Svalbard glaciers (50–500 years) compared with other areas (20–40 years). The length of the surge cycle for some glaciers is shown to reflect the time required for snow accumulation to refill the reservoir zone (e.g. Eisen et al. (2001)). Therefore, the surge cycle will be shorter where snowfall rates are higher (such as in Alaska) compared with more arid regions (such as Svalbard). In this case, Glacier No. 7, which advanced from 1986–1989, may not be triggered from a surge mechanism. Instead, it could be a response to the colder and wetter climate that was seen from the late 1980s and into the 1990s (Wang, 2009; Wang et al., 2003). However, glacier surge in Pamir and Karakoram have variable controlling processes depending on the thermal and hydrological conditions and the geomorphological characteristics of different individual glaciers (Lv et al., 2019; Quincey et al., 2015). It is possible that a similar glacier surge heterogeneity is applicable to the XM.

#### 5.4 Glacier response to climate change

From the coldest years of the Little Ice Age, the areas of the glaciers at Malan were larger by 4.6% than for modern glaciers, compared with approximately 8% and 20% in Qangtang and TP, respectively (Pu et al., 2001). Thus, it is possible that the glaciers in XM are might be more stable. However, the warming trend from the 20th century was recorded from a malan Malan ice core, and the warmest period was during-between the 1950s to-theand early 1980s. There were also-sSeveral stable cold periods that-punctuated through the warming, especially during-between the late 1980s to-and 1990s, which may have been caused by a strong summer monsoon (Wang et al., 2003). We-could-conclude-thatTherefore, we speculated that the shrinkage of the glacier areas mainly occurred from-between 1970- and 1999 and could be a response to the warming of the 1950s to the early 1980s. In addition, a higher net accumulation rate was recorded from-between 1987- and 1995 from an ice core in Malan (Wang, 2009). Thus, the colder and wetter climate from the late 1980s to 1990s (Fig. 10) might have-eould resulted in a slight negative and-or-even-positive mass change for the glaciers during this period. This is likely the reason for the relatively small negative mass loss for-the-period-of-between 1970 and -1999.

Glacier area shrinkage (1970–1999) may lag behind the mass loss from the 1950s to the early 1980s in response to a warmer climate. With the rapid warming that-has-been-seen during the 21st century, glacier mass loss could be further

accelerated. At the same time, glaciers have been observed to experience a slight area shrinkage from 2000 to 2018 relative to the colder climate from the late 1980s and into the 1990s. There was also low precipitation in XM, and the slight increases in precipitation more recently have had very little impact on glacier change in the 21st century.

## 6 Conclusions

We investigated Glacier-glacier area and mass changes for Mt. Xinqingfeng and Mt. Malanin-XM as derived from topographic maps, Landsat, ASTER, SRTM DEM, and TerraSAR-X/TanDEM-X for the period of from ~1970- to 2018 and ~1970- to 2012, respectively. Our results showed that the glaciers experienced a small shrinkage from  $641.2 \pm 7.7 \text{ km}^2$  in 1970/71 to  $613.9 \pm 4.4 \text{ km}^2$  in 2018, corresponding to an area shrinkage of  $4.3 \pm 1.4\%$  ( $0.09 \pm 0.03\% \text{ a}^{-1}$ ) from 1970 to 2018. The shrinkage speed of the glacier area decreased after 2000 and the glacier area was stable after 2013, which can be mainly attributed to the advance or surge of some glaciers. However, the mass balances of glaciers at Xinqingfeng and Malan were negative at  $-0.22 \pm 0.17 \text{ m w.e. a}^{-1}$  and  $-0.29 \pm 0.17 \text{ m w.e. a}^{-1}$  from 1999- to 2012, respectively. A lower mass loss of  $0.19 \pm 0.14 \text{ m w.e. a}^{-1}$  was found for the glaciers at Malan from 1970- to 1999 than from 1999-2012. Glacier variations at XM are heterogeneous and differ spatially as well as temporally. Glaciers facing southern slopes showed only slight mass losses at Xinqingfeng, due to three main glaciers (Glacier No. 5, Zu Glacier, Glacier No. 7) showing a mass gain of  $0.01 \pm 0.16 \sim 0.10 \pm 0.16 \text{ w.e. a}^{-1}$ . Glaciers at different aspects showed similar mass losses from 1999-2011/12; however, glaciers facing the northern slope experienced a more negative mass budget than at the southern slope, as two glaciers (Glacier Nos. 14 and 15) showed a positive mass budget from 1970-1999. A total of seven glaciers showed surging or advancing from 1970- to 2018. Among them, the West Monuomaha Glacier, Monuomaha Glacier, and Zu Glacier were identified as surging glaciers, and the others may also be surging glaciers that required more evidence. Among them, the Monuomaha Glacier was active from 2009-2016 with a maximum velocity of  $1.8 \text{ m d}^{-1}$  from 2013-2018, as compared with other glaciers with an average velocity of  $0.16 \text{ m d}^{-1}$ . These surge-type glaciers showed a long active period and comparatively low velocity, suggesting that thermal control is/was important for surge initiation and recession. The ablation area or accumulation area exhibited small slopes with velocities that were too slow to remain in balance with the accumulation rate and require surging to transport mass from the reservoir area down to the glacier tongue.

*Author contributions.* The concept of this study was developed by Zhen Zhang and Shiyin Liu. The digital elevation models were generated by Zhen Zhang and Zongli Jiang. Zhen Zhang performed the data analysis and wrote the draft of the paper. Zhen Zhang, Shiyin Liu and all other authors were involved in paper writing or supported this work.

*Competing interests.* The authors declare that they have no competing interests.

*Acknowledgements.* This research was supported by the Strategic Priority Research Program of the Chinese Academy of Sciences (Grant No. XDA19070501), The Ministry of Science and Technology (Grant No.2013FY111400), International Partnership Program of Chinese Academy of Sciences (Grant No. 131C11KYSB20160061), the National Natural Science Foundation of China (Grant Nos. 41701087, 41471067) and Research Funds Provided to New Recruitments of Yunnan University (YJRC3201702). Landsat, SRTM C-band and ASTER data were acquired from the US Geological Survey and NASA. The first and second glacier inventories were provided by a past MOST project (2006FY110200) (<http://westdc.westgis.ac.cn/glacier>). ~~We thank DLR for access to~~ SRTM X-band and TerraSAR-X/TanDEM-X data ~~were~~ acquired from DLR. GoLIVE data were acquired from NSIDC (<https://nsidc.org/data/NSIDC-0710/versions/1>), And ITS LIVE data were acquired from NASA (<https://its-live.jpl.nasa.gov/>). We ~~also~~ thank Etienne Berthier for guidance on uncertainty estimation of glacier elevation changes. We thank Shasha Zhang for preprocessing data in revising our manuscript. And we also thank two anonymous reviewers and the scientific editor for their constructive comments on the manuscript.

## References

- 15 Bahr, D. B. and Radić, V.: Significant contribution to total mass from very small glaciers, The Cryosphere, 6, 763-770, <https://doi.org/10.5194/tc-6-763-2012>, 2012.
- Bao, W., Liu, S., Wei, J., and Guo, W.: Glacier changes during the past 40 years in the West Kunlun Shan, J Mt Sci-Engl, 12, 344-357, <https://doi.org/10.1007/s11629-014-3220-0>, 2015.
- Berthier, E., Arnaud, Y., Vincent, C., and Rámy, F.: Biases of SRTM in high-mountain areas: Implications for the monitoring of glacier volume changes, Geophysical Research Letters, 33, L08502, <https://doi.org/10.1029/2006gl025862>, 2006.
- Berthier, E., Cabot, V., Vincent, C., and Six, D.: Decadal Region-Wide and Glacier-Wide Mass Balances Derived from Multi-Temporal ASTER Satellite Digital Elevation Models. Validation over the Mont-Blanc Area, Frontiers in Earth Science, 4, <https://doi.org/10.3389/feart.2016.00063>, 2016.
- 25 Björnsson, H.: Hydrological characteristics of the drainage system beneath a surging glacier, Nature, 395, 771-774, <https://doi.org/10.1038/27384>, 1998.
- Bolch, T., Pieczonka, T., and Benn, D. I.: Multi-decadal mass loss of glaciers in the Everest area (Nepal Himalaya) derived from stereo imagery, Cryosphere, 5, 349-358, <https://doi.org/10.5194/tc-5-349-2011>, 2011.
- Bolch, T., Pieczonka, T., Mukherjee, K., and Shea, J.: Brief communication: Glaciers in the Hunza catchment (Karakoram) have been nearly in balance since the 1970s, The Cryosphere, 11, 531-539, <https://doi.org/10.5194/tc-11-531-2017>, 2017.
- 30

- Brun, F., Berthier, E., Wagnon, P., Kaab, A., and Treichler, D.: A spatially resolved estimate of High Mountain Asia glacier mass balances, 2000-2016, *Nat Geosci*, 10, 668-673, <https://doi.org/10.1038/NGEO2999>, 2017.
- Burgess, E. W., Forster, R. R., Larsen, C. F., and Braun, M.: Surge dynamics on Bering Glacier, Alaska, in 2008-2011, *The Cryosphere*, 6, 1251-1262, <https://doi.org/10.5194/tc-6-1251-2012>, 2012.
- 5 Chen, A. a., Wang, N., Li, Z., Wu, Y., Zhang, W., and Guo, Z.: Region-Wide Glacier Mass Budgets for the Tanggula Mountains between ~1969 and ~2015 Derived from Remote Sensing Data, *Arctic, Antarctic, and Alpine Research*, 49, 551-568, <https://doi.org/10.1657/aaar0016-065>, 2017.
- Clarke, G. K. C., Collins, S. G., and Thompson, D. E.: Flow, Thermal Structure, and Subglacial Conditions of a Surge-Type Glacier, *Canadian Journal of Earth Sciences*, 21, 232-240, <https://doi.org/10.1139/e84-024>, 1984.
- 10 Costantini, M.: A Novel Phase Unwrapping Method Based on Network Programming, *Ieee T Geosci Remote*, 36, 813-821, <https://doi.org/10.1109/36.673674>, 1998.
- Davis, C. H. and Poznyak, V. I.: The depth of penetration in Antarctic firm at 10 GHz, *Ieee T Geosci Remote*, 31, 1107-1111, <https://doi.org/10.1109/36.263784>, 1993.
- Fahnestock, M., Scambos, T., Moon, T., Gardner, A., Haran, T., and Klinger, M.: Rapid large-area mapping of ice flow using Landsat 8, *Remote Sensing of Environment*, 185, 84-94, <https://doi.org/10.1016/j.rse.2015.11.023>, 2016.
- 15 Falaschi, D., Bolch, T., Lenzano, M. G., Tadono, T., Lo Vecchio, A., and Lenzano, L.: New evidence of glacier surges in the Central Andes of Argentina and Chile, *Progress in Physical Geography: Earth and Environment*, 42, 792-825, <https://doi.org/10.1177/0309133318803014>, 2018.
- Farinotti, D., Longuevergne, L., Moholdt, G., Duethmann, D., Molg, T., Bolch, T., Vorogushyn, S., and Guntner, A.: Substantial glacier mass loss in the Tien Shan over the past 50 years, *Nat Geosci*, 8, 716-723, <https://doi.org/10.1038/Ngeo2513>, 2015.
- Fischer, M., Huss, M., and Hoelzle, M.: Surface elevation and mass changes of all Swiss glaciers 1980–2010, *The Cryosphere*, 9, 525-540, <https://doi.org/10.5194/tc-9-525-2015>, 2015.
- Fowler, A. C., Murray, T., and Ng, F. S. L.: Thermally controlled glacier surging, *Journal of Glaciology*, 47, 527-538, 2001.
- 25 Gardelle, J., Berthier, E., and Arnaud, Y.: Impact of resolution and radar penetration on glacier elevation changes computed from DEM differencing, *Journal of Glaciology*, 58, 419-422, <https://doi.org/10.3189/2012jog11j175>, 2012a.
- Gardelle, J., Berthier, E., and Arnaud, Y.: Slight mass gain of Karakoram glaciers in the early twenty-first century, *Nat Geosci*, 5, 322-325, <https://doi.org/10.1038/Ngeo1450>, 2012b.
- Gardelle, J., Berthier, E., Arnaud, Y., and Käbb, A.: Region-wide glacier mass balances over the Pamir-Karakoram-Himalaya during 1999-2011, *The Cryosphere*, 7, 1263–1286, <https://doi.org/10.5194/tc-7-1263-2013>, 2013.
- 30

- Gardner, A. S., Moholdt, G., Cogley, J. G., Wouters, B., Arendt, A. A., Wahr, J., Berthier, E., Hock, R., Pfeffer, W. T., Kaser, G., Ligtenberg, S. R., Bolch, T., Sharp, M. J., Hagen, J. O., van den Broeke, M. R., and Paul, F.: A reconciled estimate of glacier contributions to sea level rise: 2003 to 2009, *Science*, 340, 852-857, <https://doi.org/10.1126/science.1234532>, 2013.
- 5 Gardner, A. S., Moholdt, G., Scambos, T., Fahnestock, M., Ligtenberg, S., van den Broeke, M., and Nilsson, J.: Increased West Antarctic and unchanged East Antarctic ice discharge over the last 7 years, *The Cryosphere*, 12, 521-547, <https://doi.org/10.5194/tc-12-521-2018>, 2018.
- GB/T12343.1-2008: Compilation Specifications for National Fundamental Scale Mapse——Part 1: Compilation Specifications for 1:25000/1:50000/1:100000 Topographic Maps. General Administration of Quality Supervision Inspection and Quarantine, Beijing, 2008.
- 10 Guo, W., Liu, S., Xu, J., Wu, L., Shangguan, D., Yao, X., Wei, J., Bao, W., Yu, P., Liu, Q., and Jiang, Z.: The second Chinese glacier inventory: data, methods and results, *Journal of Glaciology*, 61, 357-372, <https://doi.org/10.3189/2015JoG14J209>, 2015.
- Guo, W. Q., Liu, S. Y., Wei, J. F., and Bao, W. J.: The 2008/09 surge of central Yulinchuan glacier, northern Tibetan Plateau, as monitored by remote sensing, *Annals of Glaciology*, 54, 299-310, <https://doi.org/10.3189/2013aog63a495>, 2013.
- 15 Holzer, N., Vijay, S., Yao, T., Xu, B., Buchroithner, M., and Bolch, T.: Four decades of glacier variations at Muztagh Ata (eastern Pamir): a multi-sensor study including Hexagon KH-9 and Pléiades data, *The Cryosphere*, 9, 2071–2088, <https://doi.org/10.5194/tc-9-2071-2015>, 2015.
- Huss, M.: Density assumptions for converting geodetic glacier volume change to mass change, *The Cryosphere*, 7, 877-887, <https://doi.org/10.5194/tc-7-877-2013>, 2013.
- 20 Immerzeel, W. W., van Beek, L. P., and Bierkens, M. F.: Climate change will affect the Asian water towers, *Science*, 328, 1382-1385, <https://doi.org/10.1126/science.1183188>, 2010.
- Jiang, Z., Liu, S., Guo, W., Li, J., Long, S., Wang, X., Wei, J., Zhang, Z., and Wu, K.: Recent surface elevation changes of three representative glaciers in Ányânaqân Mountains, source region of Yellow River, *Journal of Glaciology and Geocryology*, 40, 231-237, <https://doi.org/10.7522/j.issn.1000-0240.2018.0027>, 2018 (in Chinese with English abstract).
- 25 Kääb, A., Berthier, E., Nuth, C., Gardelle, J., and Arnaud, Y.: Contrasting patterns of early twenty-first-century glacier mass change in the Himalayas, *Nature*, 488, 495-498, <https://doi.org/10.1038/nature11324>, 2012.
- Kääb, A., Treichler, D., Nuth, C., and Berthier, E.: Brief Communication: Contending estimates of 2003-2008 glacier mass balance over the Pamir–Karakoram–Himalaya, *The Cryosphere*, 9, 557-564, <https://doi.org/10.5194/tc-9-557-2015>, 2015.
- 30 Kamb, B., Raymond, C. F., Harrison, W. D., Engelhardt, H., Echelmeyer, K. A., Humphrey, N., Brugman, M. M., and Pfeffer, T.: Glacier Surge Mechanism - 1982-1983 Surge of Variegated Glacier, Alaska, *Science*, 227, 469-479, 1985.

- Kamp, U., Bolch, T., and Olsenholler, J.: DEM generation from ASTER satellite data for geomorphometric analysis of Cerro Sillajhuay, Chile/Bolivia, ASPRS 2003 Annual Conference Proceedings, Anchorage, Alaska, 2003.
- Kotlyakov, V. M., Rototaeva, O. V., and Nosenko, G. A.: The September 2002 Kolka Glacier Catastrophe in North Ossetia, Russian Federation: Evidence and Analysis, *Mountain Research and Development*, 24, 78-83, [https://doi.org/10.1659/0276-4741\(2004\)024\[0078:TSKGCI\]2.0.CO2](https://doi.org/10.1659/0276-4741(2004)024[0078:TSKGCI]2.0.CO2), 2004.
- Krieger, G., Moreira, A., Fiedler, H., Hajnsek, I., Werner, M., Younis, M., and Zink, M.: TanDEM-X: A Satellite Formation for High-Resolution SAR Interferometry, *Ieee T Geosci Remote*, 45, 3317-3341, <https://doi.org/10.1109/tgrs.2007.900693>, 2007.
- Lambrecht, A., Mayer, C., Wendt, A., Floricioiu, D., and Volksen, C.: Elevation change of Fedchenko Glacier, Pamir Mountains, from GNSS field measurements and TanDEM-X elevation models, with a focus on the upper glacier, *Journal of Glaciology*, 64, 637-648, <https://doi.org/10.1017/jog.2018.52>, 2018.
- Li, B.: *Nature Environment in the Hoh Xil Region of Qinghai*, Science Press, Beijing, 1996.
- Lin, H., Li, G., Cuo, L., Hooper, A., and Ye, Q.: A decreasing glacier mass balance gradient from the edge of the Upper Tarim Basin to the Karakoram during 2000-2014, *Scientific reports*, 7, 6712, <https://doi.org/10.1038/s41598-017-07133-8>, 2017.
- Lingle, C. S. and Fatland, D. R.: Does englacial water storage drive temperate glacier surges?, *Annals of Glaciology*, 36, 14-20, <https://doi.org/10.3189/172756403781816464>, 2003.
- Liu, L., Jiang, L., Jiang, H., Wang, H., Ma, N., and Xu, H.: Accelerated glacier mass loss (2011–2016) over the Puruogangri ice field in the inner Tibetan Plateau revealed by bistatic InSAR measurements, *Remote Sensing of Environment*, 231, 111241, <https://doi.org/10.1016/j.rse.2019.111241>, 2019.
- Liu, Q., Guo, W., Nie, Y., Liu, S., and Xu, J.: Recent glacier and glacial lake changes and their interactions in the Bugyai Kangri, southeast Tibet, *Annals of Glaciology*, <https://doi.org/10.3189/2016AoG71A415>, 2015.
- Motyka, R. J. and Truffer, M.: Hubbard Glacier, Alaska: 2002 closure and outburst of Russell Fjord and postflood conditions at Gilbert Point, *Journal of Geophysical Research*, 112, F02004, <https://doi.org/10.5194/10.1029/2006jf000475>, 2007.
- Mukherjee, K., Bolch, T., Goerlich, F., Kutuzov, S., Osmonov, A., Pieczonka, T., and Shesterova, I.: Surge-Type Glaciers in the Tien Shan (Central Asia), Arctic, Antarctic, and Alpine Research, 49, 147-171, <https://doi.org/10.1657/aaar0016-021>, 2018.
- Murray, T., Stuart, G. W., Miller, P. J., Woodward, J., Smith, A. M., Porter, P. R., and Jiskoot, H.: Glacier surge propagation by thermal evolution at the bed, *Journal of Geophysical Research*, 105, 13491, 2000.

- Neckel, N., Braun, A., Kropáček, J., and Hochschild, V.: Recent mass balance of the Purogangri Ice Cap, central Tibetan Plateau, by means of differential X-band SAR interferometry, *The Cryosphere*, 7, 1623-1633, <https://doi.org/10.5194/tc-7-1623-2013>, 2013.
- Neckel, N., Kropáček, J., Bolch, T., and Hochschild, V.: Glacier mass changes on the Tibetan Plateau 2003–2009 derived from ICESat laser altimetry measurements, *Environmental Research Letters*, 9, 1-7, <https://doi.org/10.1088/1748-9326/9/1/014009>, 2014.
- Nuth, C. and Kääb, A.: Co-registration and bias corrections of satellite elevation data sets for quantifying glacier thickness change, *The Cryosphere*, 5, 271-290, <https://doi.org/10.5194/tc-5-271-2011>, 2011.
- Pu, J., Yao, T., Wang, N., Ding, L., and Zhang, Q.: Recent Variation of the Malan Glacier in Hoh Xil Region of the Tibetan Plateau, *Journal of Glaciology and Geocryology*, 23, 189-192, 2001 (in Chinese with English abstract).
- Qiao, C.: Remote Sensing Monitoring of Glacier Changes in Dongkemadi Region of Tanggula Mountain, *Journal of Anhui Agricultural Sciences*, 38, 7703-7705, 2010 (in Chinese with English abstract).
- Quincey, D. J., Glasser, N. F., Cook, S. J., and Luckman, A.: Heterogeneity in Karakoram glacier surges, *Journal of Geophysical Research: Earth Surface*, 120, 1288-1300, <https://doi.org/10.1002/2015jf003515>, 2015.
- Round, V., Leinss, S., Huss, M., Haemmig, C., and Hajnsek, I.: Surge dynamics and lake outbursts of Kyagar Glacier, Karakoram, *The Cryosphere*, 11, 723-739, <https://doi.org/10.5194/tc-11-723-2017>, 2017.
- Sakai, A., Nuimura, T., Fujita, K., Takenaka, S., Nagai, H., and Lamsal, D.: Climate regime of Asian glaciers revealed by GAMDAM glacier inventory, *The Cryosphere*, 9, 865-880, <https://doi.org/10.5194/tc-9-865-2015>, 2015.
- Sam, L., Bhardwaj, A., Kumar, R., Buchroithner, M. F., and Martin-Torres, F. J.: Heterogeneity in topographic control on velocities of Western Himalayan glaciers, *Scientific reports*, 8, 12843, <https://doi.org/10.1038/s41598-018-31310-y>, 2018.
- Sevestre, H. and Benn, D. I.: Climatic and geometric controls on the global distribution of surge-type glaciers: implications for a unifying model of surging, *Journal of Glaciology*, 61, 646-662, <https://doi.org/10.3189/2015JoG14J136>, 2015.
- Sevestre, H., Benn, D. I., Hulton, N. R. J., and Baelum, K.: Thermal structure of Svalbard glaciers and implications for thermal switch models of glacier surging, *Journal of Geophysical Research: Earth Surface*, 120, 2220-2236, <https://doi.org/10.1002/2015jf003517>, 2015.
- Shangguan, D. H., Bolch, T., Ding, Y. J., Kröhnert, M., Pieczonka, T., Wetzell, H. U., and Liu, S. Y.: Mass changes of Southern and Northern Inylchek Glacier, Central Tian Shan, Kyrgyzstan, during ~1975 and 2007 derived from remote sensing data, *The Cryosphere*, 9, 703-717, <https://doi.org/10.5194/tc-9-703-2015>, 2015.
- Sun, M., Liu, S., Yao, X., Guo, W., and Xu, J.: Glacier changes in the Qilian Mountains in the past half-century: Based on the revised First and Second Chinese Glacier Inventory, *J Geogr Sci*, 28, 206-220, <https://doi.org/10.1007/s11442-018-1468-y>, 2018.

- Surdyk, S.: Using microwave brightness temperature to detect short-term surface air temperature changes in Antarctica: An analytical approach, *Remote Sensing of Environment*, 80, 256-271, [https://doi.org/10.1016/S0034-4257\(01\)00308-X](https://doi.org/10.1016/S0034-4257(01)00308-X), 2002.
- Wang, D. and Kääb, A.: Modeling Glacier Elevation Change from DEM Time Series, *Remote Sensing*, 7, 10117-10142, <https://doi.org/10.3390/rs70810117>, 2015.
- 5 Wang, H., Hu, J., Tan, q., and Xu, X.: Evaluation of the contour line interpolation generated DEMs of mountainous area in north China, *Contributions to Geology and Mineral Resources Research*, 29, 433-437, <https://doi.org/10.606053/j.issn.1001-1412.2014.03.019>, 2014 (in Chinese with English abstract).
- Wang, N.: Variations in net accumulation rate of the malan ice core from the northern tibetan plateau over the period of 1887 though 1998 and their relationship to solar activity, *Quaternary Sciences*, 29, 913-919, 2009 (in Chinese with English abstract).
- 10 Wang, Y., Pu, J., Zhang, Y., and Sun, W.: Characteristic of Present Warming Change Recorded in Malan Ice Core, Central Tibetan Plateau, *Journal of Glaciology and Geocryology*, 25, 130-134, 2003 (in Chinese with English abstract).
- Wang, Y., Wu, L., Xu, J., and Liu, S.: Variation and uncertainty analysis of the glaciers in the past 50 years in Geladandong of Tibetan Plateau, *Journal of Glaciology and Geocryology*, 35, 255-262, 2013 (in Chinese with English abstract).
- 15 Wei, J., Liu, S., Guo, W., Xu, J., Bao, W., and Shanguan, D.: Changes in Glacier Volume in the North Bank of the Bangong Co Basin from 1968 to 2007 Based on Historical Topographic Maps, SRTM, and ASTER Stereo Images, *Arctic, Antarctic, and Alpine Research*, 47, 301-311, <https://doi.org/10.1657/aaar00c-13-129>, 2015a.
- Wei, J., Liu, S., Xu, J., Guo, W., Bao, W., Shanguan, D., and Jiang, Z.: Mass Loss from Glaciers in the Chinese Altai Mountains between 1959 and 2008 Revealed Based on Historical Maps, SRTM, and ASTER Images, *J Mt Sci-Engl*, 12, 330-343, <https://doi.org/10.1007/s11629-014-3175-1>, 2015b.
- 20 Wei, J. F., Liu, S. Y., Guo, W. Q., Yao, X. J., Xu, J. L., Bao, W. J., and Jiang, Z. L.: Surface-area changes of glaciers in the Tibetan Plateau interior area since the 1970s using recent Landsat images and historical maps, *Annals of Glaciology*, 55, 213-222, <https://doi.org/10.3189/2014aog66a038>, 2014.
- Wu, K., Liu, S., Guo, W., Wei, J., Xu, J., Bao, W., and Yao, X.: Glacier change in the western Nyainqentanglha Range, Tibetan Plateau using historical maps and Landsat imagery:1970-2014, *J Mt Sci-Engl*, 13, 1358-1374, <https://doi.org/10.1007/s11629-0163997-0>, 2016.
- 25 Wu, K., Liu, S., Jiang, Z., Xu, J., Wei, J., and Guo, W.: Recent glacier mass balance and area changes in the Kangri Karpo Mountains from DEMs and glacier inventories, *The Cryosphere*, 12, 103-121, <https://doi.org/10.5194/tc-12-103-2018>, 2018.
- Xie, Z., Han, J., Feng, Q., and Wang, X.: Primary Study on the Glaciers of Mountain Malan, Hoh Xil Region, Qinghai-Xizang Plateau, *Journal of Natural Science of Hunan Normal University*, 23, 83-88, 2000 (in Chinese with English abstract).
- 30

设置了格式: 字体: (默认) Times New Roman, (中文) Times New Roman

- Xu, J., Shangguan, D., and Wang, J.: Three-Dimensional Glacier Changes in Geladandong Peak Region in the Central Tibetan Plateau, *Water*, 10, 1749, <https://doi.org/10.3390/w10121749>, 2018.
- Yao, T. D., Thompson, L., Yang, W., Yu, W. S., Gao, Y., Guo, X. J., Yang, X. X., Duan, K. Q., Zhao, H. B., Xu, B. Q., Pu, J. C., Lu, A. X., Xiang, Y., Kattel, D. B., and Joswiak, D.: Different glacier status with atmospheric circulations in Tibetan Plateau and surroundings, *Nat Clim Change*, 2, 663-667, <https://doi.org/10.1038/Nclimate1580>, 2012.
- Yao, X., Liu, S., Zhu, Y., Gong, P., An, L., and Li, X.: Design and implementation of an automatic method for deriving glacier centerlines based on GIS, *Journal of Glaciology and Geocryology*, 37, 1563-1570, <https://doi.org/10.7522/j.issn.1000-0240.2015.0173>, 2015 (in Chinese with English abstract).
- Ye, Q., Zong, J., Tian, L., Cogley, J. G., Song, C., and Guo, W.: Glacier changes on the Tibetan Plateau derived from Landsat imagery: mid-1970s – 2000–13, *Journal of Glaciology*, 63, 273-287, <https://doi.org/10.1017/jog.2016.137>, 2017.
- Zhang, W.: A Surging Glacier in the Nanjiabawa Peak Area, Himalayas, *Journal of Glaciology and Geocryology*, 5, 75-76, 1983 (in Chinese with English abstract).
- Zhang, Z. and Liu, S.: Area changes and mass balance of glaciers in KangzhagRi of the Tibetan Plateau from 1970 to 2016 as derived from remote Sensing data, *Journal of Geo-information Science*, 20, 1338-1349, <https://doi.org/10.12082/dqxkx.2018.180059>, 2018 (in Chinese with English abstract).
- Zhang, Z., Liu, S., Wei, J., Xu, J., Guo, W., Bao, W., and Jiang, Z.: Mass Change of Glaciers in Muztag Ata-Kongur Tagh, Eastern Pamir, China from 1971/76 to 2013/14 as Derived from Remote Sensing Data, *PloS one*, 11, e0147327, <https://doi.org/10.1371/journal.pone.0147327>, 2016.
- Zhang, Z., Liu, S., Zhang, Y., Wei, J., Jiang, Z., and Wu, K.: Glacier variations at Aru Co in western Tibet from 1971 to 2016 derived from remote-sensing data, *Journal of Glaciology*, 64, 397-406, <https://doi.org/10.1017/jog.2018.34>, 2018.
- Zhou, Y. S., Hu, J., Li, Z. W., Li, J., Zhao, R., and Ding, X. L.: Quantifying glacier mass change and its contribution to lake growths in central Kunlun during 2000-2015 from multi-source remote sensing data, *Journal of Hydrology*, 570, 38-50, <https://doi.org/10.1177/0309133318803014>, 2019.

- Bao, W., Liu, S., Wei, J., and Guo, W.: Glacier changes during the past 40 years in the West Kunlun Shan, *J. Mt. Sci.*, 12, 344–357, <https://doi.org/10.1007/s11629-014-3220-0>, 2015.
- Benn, D. I. and Evans, D. J. A.: *Glaciers and glaciation*, Routledge, 2010.
- Bhambri, R., Hewitt, K., Kawishwar, P., and Pratap, B.: Surge-type and surge-modified glaciers in the Karakoram, *Sci. Rep.*, 7, 15391, <https://doi.org/10.1038/s41598-017-15473-8>, 2017.
- Björnsson, H., Pálsson, F., Sigurdsson, O., and Flowers, G. E.: Surges of glaciers in Iceland, *Ann. Glaciol.*, 36, 82–90, <https://doi.org/10.3189/172756403781816365>, 2003.
- Bolch, T., Pieczonka, T., and Benn, D. I.: Multi-decadal mass loss of glaciers in the Everest area (Nepal Himalaya) derived from stereo imagery, *The Cryosphere*, 5, 349–358, <https://doi.org/10.5194/tc-5-349-2011>, 2011.
- Bolch, T., Pieczonka, T., Mukherjee, K., and Shea, J.: Brief communication: Glaciers in the Hunza catchment (Karakoram) have been nearly in balance since the 1970s, *The Cryosphere*, 11, 531–539, <https://doi.org/10.5194/tc-11-531-2017>, 2017.
- Brun, F., Berthier, E., Wagnon, P., Kaab, A., and Treichler, D.: A spatially-resolved estimate of High Mountain Asia glacier mass balances, 2000–2016, *Nat. Geosci.*, 10, 668–673, <https://doi.org/10.1038/NGEO2999>, 2017.
- Burgess, E. W., Forster, R. R., Larsen, C. F., and Braun, M.: Surge dynamics on Bering Glacier, Alaska, in 2008–2011, *The Cryosphere*, 6, 1251–1262, <https://doi.org/10.5194/tc-6-1251-2012>, 2012.
- Chen, A. a., Wang, N., Li, Z., Wu, Y., Zhang, W., and Guo, Z.: Region-Wide Glacier Mass Budgets for the Tanggula Mountains between ~1969 and ~2015 Derived from Remote Sensing Data, *Arct. Antarct. Alp. Res.*, 49, 551–568, <https://doi.org/10.1657/aaar0016-065>, 2017.
- Chudley, T. R. and Willis, I. C.: Glacier surges in the north-west West Kunlun Shan inferred from 1972 to 2017 Landsat imagery, *J. Glaciol.*, 65, 1–12, <https://doi.org/10.1017/jog-2018-94>, 2018.
- Clarke, G. K. C., Collins, S. G., and Thompson, D. E.: Flow, Thermal Structure, and Subglacial Conditions of a Surge-Type Glacier, *Can. J. Earth Sci.*, 21, 232–240, <https://doi.org/10.1139/e84-024>, 1984.
- Copland, L., Sylvestre, T., Bishop, M. P., Shroder, J. F., Seong, Y. B., Owen, L. A., Bush, A., and Kamp, U.: Expanded and Recently Increased Glacier Surging in the Karakoram, *Arct. Antarct. Alp. Res.*, 43, 503–516, <https://doi.org/10.1657/1938-4246.43.4.503>, 2011.
- Costantini, M.: A Novel Phase Unwrapping Method Based on Network Programming, *IEEE T. Geosci. Remote.*, 36, 813–821, <https://doi.org/10.1109/36.673674>, 1998.
- Eisen, O., Harrison, W. D., and Raymond, C. F.: The surges of Variegated Glacier, Alaska, U.S.A., and their connection to climate and mass balance, *J. Glaciol.*, 47, 351–358, <https://doi.org/10.3189/172756501781832179>, 2001.
- Fahnestock, M., Seambos, T., Moon, T., Gardner, A., Haran, T., and Klinger, M.: Rapid large-area mapping of ice flow using Landsat 8, *Remote Sens. Environ.*, 185, 84–94, <https://doi.org/10.1016/j.rse.2015.11.023>, 2016.

- Falaschi, D., Bolch, T., Lenzano, M. G., Tadono, T., Lo Vecchio, A., and Lenzano, L.: New evidence of glacier surges in the Central Andes of Argentina and Chile, *Prog. Phys. Geogr.: Earth Environ.*, 42, 792–825, <https://doi.org/10.1177/0309133318803014>, 2018.
- Farinotti, D., Longuevergne, L., Moholdt, G., Duethmann, D., Mäg, T., Bolch, T., Vorogushyn, S., and Gintner, A.: Substantial glacier mass loss in the Tien-Shan over the past 50 years, *Nat. Geosci.*, 8, 1–8, <https://doi.org/10.1038/Ngeo2513>, 2015.
- Gardelle, J., Berthier, E., and Arnaud, Y.: Impact of resolution and radar penetration on glacier elevation changes computed from DEM differencing, *J. Glaciol.*, 58, 419–422, <https://doi.org/10.3189/2012jog11j175>, 2012a.
- Gardelle, J., Berthier, E., and Arnaud, Y.: Slight mass gain of Karakoram glaciers in the early twenty-first century, *Nat. Geosci.*, 5, 322–325, <https://doi.org/10.1038/Ngeo1450>, 2012b.
- Gardelle, J., Berthier, E., Arnaud, Y., and Kääb, A.: Region-wide glacier mass balances over the Pamir-Karakoram-Himalaya during 1999–2011, *The Cryosphere*, 7, 1263–1286, <https://doi.org/10.5194/tc-7-1263-2013>, 2013.
- Gardner, A. S., Moholdt, G., Cogley, J. G., Wouters, B., Arendt, A. A., Wahr, J., Berthier, E., Hock, R., Pfeffer, W. T., Kaser, G., Ligtenberg, S. R., Bolch, T., Sharp, M. J., Hagen, J. O., van den Broeke, M. R., and Paul, F.: A reconciled estimate of glacier contributions to sea level rise: 2003 to 2009, *Science*, 340, 852–857, <https://doi.org/10.1126/science.1234532>, 2013.
- Guo, W., Liu, S., Xu, J., Wu, L., Shangguan, D., Yao, X., Wei, J., Bao, W., Yu, P., Liu, Q., and Jiang, Z.: The second Chinese glacier inventory: data, methods and results, *J. Glaciol.*, 61, 357–372, <https://doi.org/10.3189/2015JoG14J209>, 2015.
- Guo, W., Q., Liu, S., Y., Wei, J. F., and Bao, W. J.: The 2008/09 surge of central Yulinchuan glacier, northern Tibetan Plateau, as monitored by remote sensing, *Ann. Glaciol.*, 54, 299–310, <https://doi.org/10.3189/2013aog63a495>, 2013.
- Holzer, N., Vijay, S., Yao, T., Xu, B., Buchroithner, M., and Bolch, T.: Four decades of glacier variations at Muztagh Ata (eastern Pamir): a multi-sensor study including Hexagon KH-9 and Pléiades data, *The Cryosphere*, 9, 2071–2088, <https://doi.org/10.5194/tc-9-2071-2015>, 2015.
- Huss, M.: Density assumptions for converting geodetic glacier volume change to mass change, *The Cryosphere*, 7, 877–887, <https://doi.org/10.5194/tc-7-877-2013>, 2013.
- Immerzeel, W. W., van Beek, L. P., and Bierkens, M. F.: Climate change will affect the Asian water towers, *Science*, 328, 1382–1385, <https://doi.org/10.1126/science.1183188>, 2010.
- Jiang, Z., Liu, S., Guo, W., Li, J., Long, S., Wang, X., Wei, J., Zhang, Z., and Wu, K.: Recent surface elevation changes of three representative glaciers in Anyamaqan Mountains, source region of Yellow River, *J. Glaciol. and Geocryol.*, 40, 231–237, <https://doi.org/10.7522/j.issn.1000-0240.2018.0027>, 2018 (in Chinese with English abstract).

- Kääb, A., Berthier, E., Nuth, C., Gardelle, J., and Arnaud, Y.: Contrasting patterns of early twenty-first-century glacier mass change in the Himalayas, *Nature*, 488, 495–498, <https://doi.org/10.1038/nature11324>, 2012.
- Kääb, A., Treichler, D., Nuth, C., and Berthier, E.: Brief Communication: Contending estimates of 2003–2008 glacier mass balance over the Pamir–Karakoram–Himalaya, *The Cryosphere*, 9, 557–564, <https://doi.org/10.5194/tc-9-557-2015>, 2015.
- 5 Kamp, U., Bolch, T., and Olsenholler, J.: DEM-generation from ASTER-satellite data for geomorphometric analysis of Cerro Sillajhuay, Chile/Bolivia, *ASPRS 2003 Annual Conference Proceedings*, Anchorage, Alaska, 2003.
- Kotlyakov, V. M., Osipova, G. B., and Tsvetkov, D. G.: Monitoring surging glaciers of the Pamirs, central Asia, from space, *Ann. Glaciol.*, 48, 125–134, <https://doi.org/10.3189/172756408784700608>, 2008.
- Kotlyakov, V. M., Rototaeva, O. V., and Nosenko, G. A.: The September 2002 Kolka Glacier Catastrophe in North Ossetia, Russian Federation: Evidence and Analysis, *Mt. Res. Dev.*, 24, 78–83, [https://doi.org/10.1659/0276-4741\(2004\)024\[0078:TSKGCH\]2.0.CO;2](https://doi.org/10.1659/0276-4741(2004)024[0078:TSKGCH]2.0.CO;2), 2004.
- 10 Krieger, G., Moreira, A., Fiedler, H., Hajnsek, I., Werner, M., Younis, M., and Zink, M.: TanDEM-X: A Satellite Formation for High-Resolution SAR Interferometry, *IEEE T. Geosci. Remote.*, 45, 3317–3341, <https://doi.org/10.1109/tgrs.2007.900693>, 2007.
- 15 Lin, H., Li, G., Cuo, L., Hooper, A., and Ye, Q.: A decreasing glacier mass balance gradient from the edge of the Upper Tarim Basin to the Karakoram during 2000–2014, *Scientific reports*, 7, 1–9, <https://doi.org/10.1038/s41598-017-07133-8>, 2017.
- Lingle, C. S. and Fatland, D. R.: Does englacial water storage drive temperate glacier surges?, *Ann. Glaciol.*, 36, 14–20, <https://doi.org/10.3189/172756403781816464>, 2003.
- 20 Liu, Q., Guo, W., Nie, Y., Liu, S., and Xu, J.: Recent glacier and glacial lake changes and their interactions in the Bugyai Kangri, southeast Tibet, *Ann. Glaciol.*, 57, 61–69, <https://doi.org/10.3189/2016AoG71A415>, 2015.
- Liu, S., Shangguan, D., Ding, Y., Han, H., Zhang, Y., Wang, J., Xie, C., Ding, L., and Li, G.: Variation of Glaciers Studied on the Basis of RS and GIS: A Reassessment of the Changes of the Xinqingfeng and Malan Ice Caps in the Northern Tibetan Plateau, *J. Glaciol. Geocryol.*, 26, 244–252, 2004 (in Chinese with English abstract).
- 25 Lv, M., Guo, H., Lu, X., Liu, G., Yan, S., Ruan, Z., Ding, Y., and Quincey, D. J.: Characterizing the behaviour of surge and non surge type glaciers in the Kingata Mountains, eastern Pamir, from 1999 to 2016, *The Cryosphere*, 13, 219–236, <https://doi.org/10.5194/tc-2018-131>, 2019.
- Motyka, R. J. and Truffer, M.: Hubbard Glacier, Alaska: 2002 closure and outburst of Russell Fjord and postflood conditions at Gilbert Point, *J. Geophys. Res.*, 112, F02004, <https://doi.org/10.5194/10.1029/2006jf000475>, 2007.
- 30 Mukherjee, K., Bolch, T., Goerlich, F., Kutuzov, S., Osmonov, A., Pieczonka, T., and Shesterova, I.: Surge-Type Glaciers in the Tien-Shan (Central Asia), *Arct. Antarct. Alp. Res.*, 49, 147–171, <https://doi.org/10.1657/aaar0016-021>, 2018.

- Murray, T., Stuart, G. W., Miller, P. J., Woodward, J., Smith, A. M., Porter, P. R., and Jiskoot, H.: Glacier surge propagation by thermal evolution at the bed, *J. Geophys. Res.*, 105, 13491, <https://doi.org/10.1029/2000jb900066>, 2000.
- Neckel, N., Braun, A., Kropáček, J., and Hochschild, V.: Recent mass balance of the Purogangri Ice Cap, central Tibetan Plateau, by means of differential X-band SAR interferometry, *The Cryosphere*, 7, 1623–1633, <https://doi.org/10.5194/tc-7-1623-2013>, 2013.
- Neckel, N., Kropáček, J., Bolch, T., and Hochschild, V.: Glacier mass changes on the Tibetan Plateau 2003–2009 derived from ICESat laser altimetry measurements, *Environ. Res. Lett.*, 9, 1–7, <https://doi.org/10.1088/1748-9326/9/1/014009>, 2014.
- Nuth, C. and Kääb, A.: Co-registration and bias corrections of satellite elevation data sets for quantifying glacier thickness change, *The Cryosphere*, 5, 271–290, <https://doi.org/10.5194/tc-5-271-2011>, 2011.
- Pu, J., Yao, T., Wang, N., Ding, L., and Zhang, Q.: Recent Variation of the Malan Glacier in Hoh Xil Region of the Tibetan Plateau, *J. Glaciol. and Geocryol.*, 23, 189–192, 2001 (in Chinese with English abstract).
- Qiao, C.: Remote Sensing Monitoring of Glacier Changes in Dongkemadi Region of Tanggula Mountain, *J. Anhui Agric. Sci.*, 38, 7703–7705, 2010 (in Chinese with English abstract).
- Quincey, D. J., Glasser, N. F., Cook, S. J., and Luckman, A.: Heterogeneity in Karakoram glacier surges, *J. Geophys. Res.: Earth Surf.*, 120, 1288–1300, <https://doi.org/10.1002/2015jf003515>, 2015.
- Round, V., Leinss, S., Huss, M., Haemmig, C., and Hajnsek, I.: Surge dynamics and lake outbursts of Kyagar Glacier, Karakoram, *The Cryosphere*, 11, 723–739, <https://doi.org/10.5194/tc-11-723-2017>, 2017.
- Sam, L., Bhardwaj, A., Kumar, R., Buchroithner, M. F., and Martin-Torres, F. J.: Heterogeneity in topographic control on velocities of Western Himalayan glaciers, *Sci. Rep.*, 8, 12843, <https://doi.org/10.1038/s41598-018-31310-y>, 2018.
- Sevestre, H. and Benn, D. I.: Climatic and geometric controls on the global distribution of surge-type glaciers: implications for a unifying model of surging, *J. Glaciol.*, 61, 646–662, <https://doi.org/10.3189/2015JoG14J136>, 2015.
- Shangguan, D. H., Liu, S. Y., Ding, Y. J., Guo, W. Q., Xu, B. Q., Xu, J. L., and Jiang, Z. L.: Characterizing the May 2015 Karayaylak Glacier surge in the eastern Pamir Plateau using remote sensing, *J. Glaciol.*, 62, 944–953, <https://doi.org/10.1017/jog.2016.81>, 2016.
- Sun, M., Liu, S., Yao, X., Guo, W., and Xu, J.: Glacier changes in the Qilian Mountains in the past half-century: Based on the revised First and Second Chinese Glacier Inventory, *J. Geogr. Sci.*, 28, 206–220, <https://doi.org/10.1007/s11442-018-1468-y>, 2018.
- Wang, N.: Variations in net accumulation rate of the malan ice core from the northern tibetan plateau over the period of 1887 though 1998 and their relationship to solar activity, *Quat. Sci.*, 29, 913–919, 2009 (in Chinese with English abstract).
- Wang, Y., Pu, J., Zhang, Y., and Sun, W.: Characteristic of Present Warming Change Recorded in Malan Ice Core, Central Tibetan Plateau, *J. Glaciol. Geocryol.*, 25, 130–134, 2003 (in Chinese with English abstract).

- Wang, Y., Wu, L., Xu, J., and Liu, S.: Variation and uncertainty analysis of the glaciers in the past 50 years in Geladandong of Tibetan Plateau, *J. Glaciol. Geocryol.*, 35, 255-262, 2013 (in Chinese with English abstract).
- Wei, J. F., Liu, S. Y., Guo, W. Q., Yao, X. J., Xu, J. L., Bao, W. J., and Jiang, Z. L.: Surface area changes of glaciers in the Tibetan Plateau interior area since the 1970s using recent Landsat images and historical maps, *Ann. Glaciol.*, 55, 213-222, <https://doi.org/10.3189/2014aog66a038>, 2014.
- Wu, K., Liu, S., Guo, W., Wei, J., Xu, J., Bao, W., and Yao, X.: Glacier change in the western Nyainqentanglha Range, Tibetan Plateau using historical maps and Landsat imagery: 1970-2014, *J. Mt. Sci. Engl.*, 13, 1358-1374, <https://doi.org/10.1007/s11629-0163997-0>, 2016.
- Wu, K., Liu, S., Jiang, Z., Xu, J., Wei, J., and Guo, W.: Recent glacier mass balance and area changes in the Kangri Karpo Mountains from DEMs and glacier inventories, *The Cryosphere*, 12, 103-121, <https://doi.org/10.5194/tc-12-103-2018>, 2018.
- Xie, Z., Han, J., Feng, Q., and Wang, X.: Primary Study on the Glaciers of Mountain Malan, Hoh Xil Region, Qinghai-Xizang Plateau, *J. Nat. Sci. Hunan Norm. Univer.*, 23, 83-88, 2000 (in Chinese with English abstract).
- Xu, J., Shangguan, D., and Wang, J.: Three Dimensional Glacier Changes in Geladandong Peak Region in the Central Tibetan Plateau, *Water*, 10, 1749, <https://doi.org/10.3390/w10121749>, 2018.
- Yao, X., Liu, S., Zhu, Y., Gong, P., An, L., and Li, X.: Design and implementation of an automatic method for deriving glacier centerlines based on GIS, *J. Glaciol. Geocryol.*, 37, 1563-1570, <https://doi.org/10.7522/j.issn.1000-0240.2015.0173>, 2015 (in Chinese with English abstract).
- Ye, Q., Zong, J., Tian, L., Cogley, J. G., Song, C., and Guo, W.: Glacier changes on the Tibetan Plateau derived from Landsat imagery: mid-1970s—2000-13, *J. Glaciol.*, 63, 273-287, <https://doi.org/10.1017/jog.2016.137>, 2017.
- Zhang, W.: A Surging Glacier in the Nanjiabawa Peak Area, Himalayas, *J. Glaciol. Geocryol.*, 5, 75-76, 1983 (in Chinese with English abstract).
- Zhang, Z. and Liu, S.: Area changes and mass balance of glaciers in Kangzhangri of the Tibetan Plateau from 1970 to 2016 as derived from remote sensing data, *J. Geo-info. Sci.*, 20, 1338-1349, <https://doi.org/10.12082/dqxkx.2018.180059>, 2018 (in Chinese with English abstract).
- Zhang, Z., Liu, S., Wei, J., Xu, J., Guo, W., Bao, W., and Jiang, Z.: Mass Change of Glaciers in Muztag Ata Kongur Tagh, Eastern Pamir, China from 1971/76 to 2013/14 as Derived from Remote Sensing Data, *PloS ONE*, 11, e0147327, <https://doi.org/10.1371/journal.pone.0147327>, 2016.
- Zhang, Z., Liu, S., Zhang, Y., Wei, J., Jiang, Z., and Wu, K.: Glacier variations at Aru Co in western Tibet from 1971 to 2016 derived from remote sensing data, *J. Glaciol.*, 64, 397-406, <https://doi.org/10.1017/jog.2018.34>, 2018.

Zhou, Y., Hu, J., Li, Z., Li, J., Zhao, R., and Ding, X.: Quantifying glacier mass change and its contribution to lake growths in Central Kunlun during 2000–2015 from multi-source remote sensing data, *J. Hydrol.*, 570, 38–50, <https://doi.org/10.1177/0309133318803014>, 2019.

5

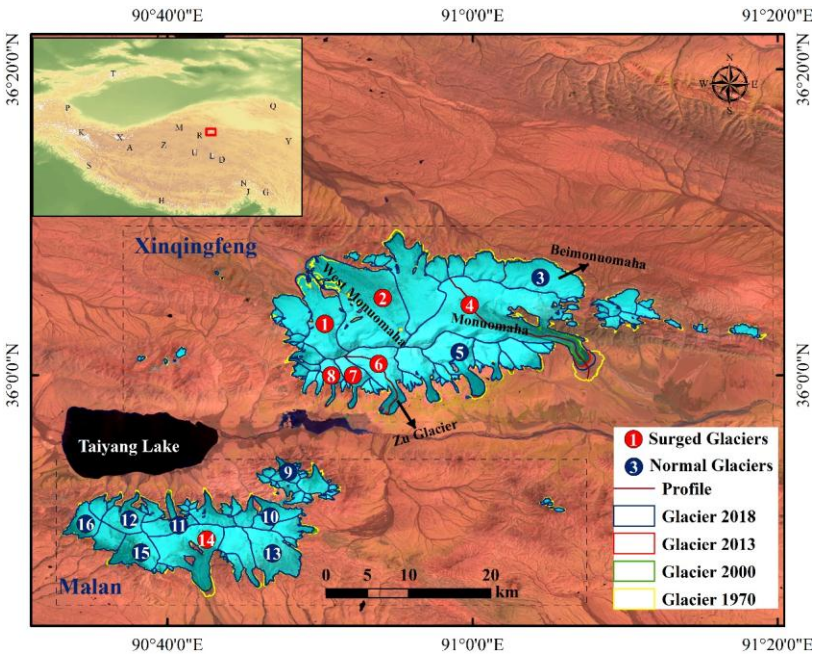

Fig-ure 1- Overview of the Xinqingfeng and Malan glaciers (Background image: Landsat 8 OLI of 31 July 2013, A: Aru Co, D: Dongkemadi, G: Kangri Karpo, H: Himalayas, J: Namjagbarwa, K: Karakoram, L: Geladandong, M:Ulugh Muztagh, N: Nyainqentanglha, P: Pamir, Q: Qilian, R: Kangzhag Ri, S: Spiti Lahaul, T: Tien Shan, U: Purogangri, X: West Kunlun, Y: Anyânaqân, Z: Zangsar Kangri).

10

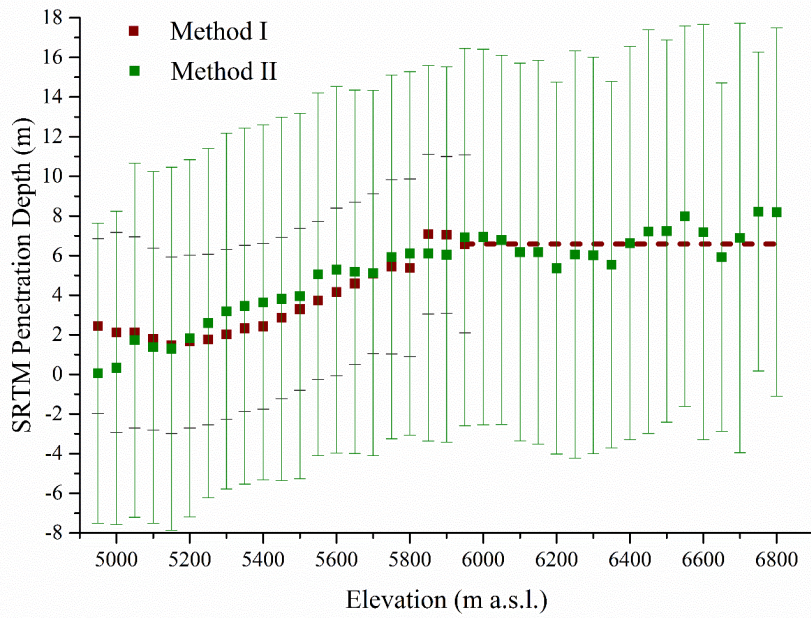

**Figure 2. Estimation of the penetration depth of SRTM-C<sub>1</sub> radar signal by the differences between SRTM-C and SRTM-X DEM with assuming no penetration of SRTM-X (Method I) and linearly extrapolated  $dh/dt$  of correctional ASTER DEMs (Method II).**

设置了格式: 字体: 加粗

设置了格式: 字体: 加粗

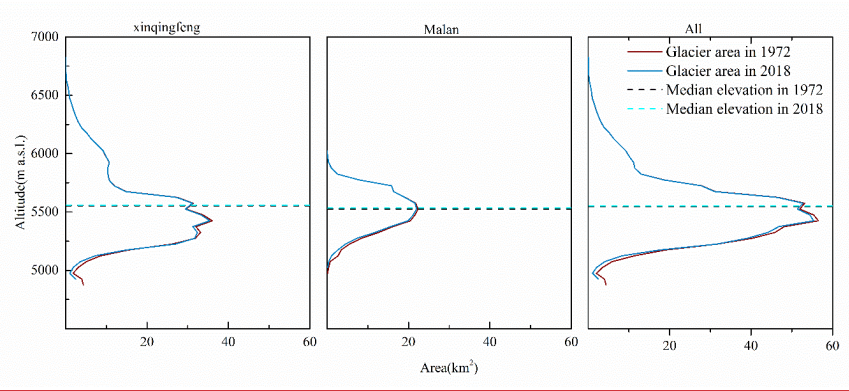

Figure 3. Hypsography of glaciers in 1970/71 and 2018.

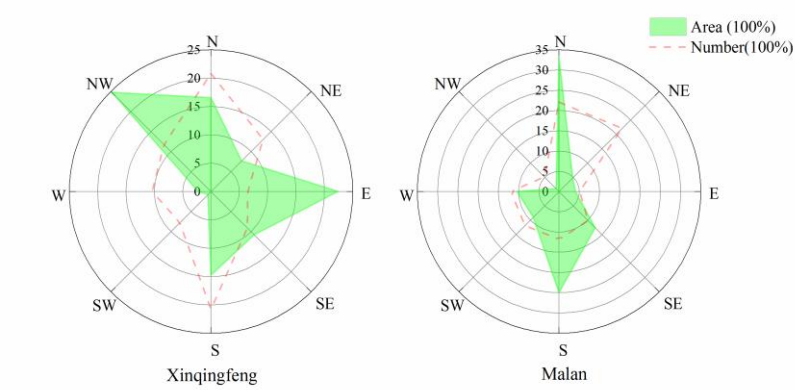

Fig. 2: Diagram showing the number and area covered for different aspect of the glaciers.

设置了格式: 字体: 加粗

设置了格式: 字体: 加粗

设置了格式: 字体: 加粗

设置了格式: 字体: 加粗

带格式的: 正文

设置了格式: 字体: 加粗

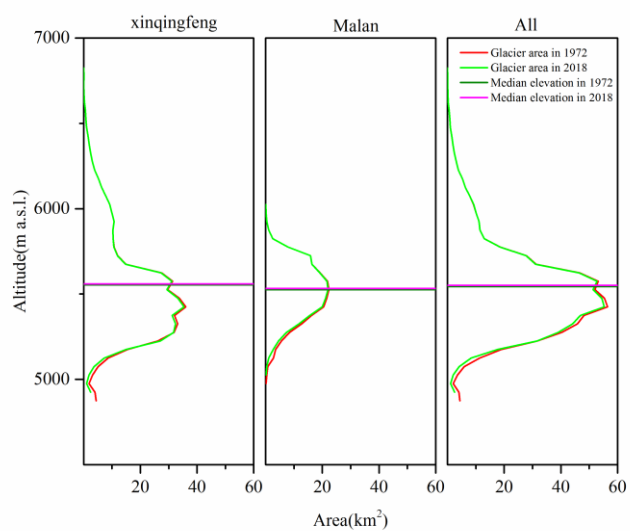

**Fig. 3: Hypsography of glaciers in 1970/71 and 2018.**

设置了格式: 字体: 加粗

带格式的: 左, 行距: 单倍行距

设置了格式: 字体: 加粗

带格式的: 正文

设置了格式: 字体: 加粗

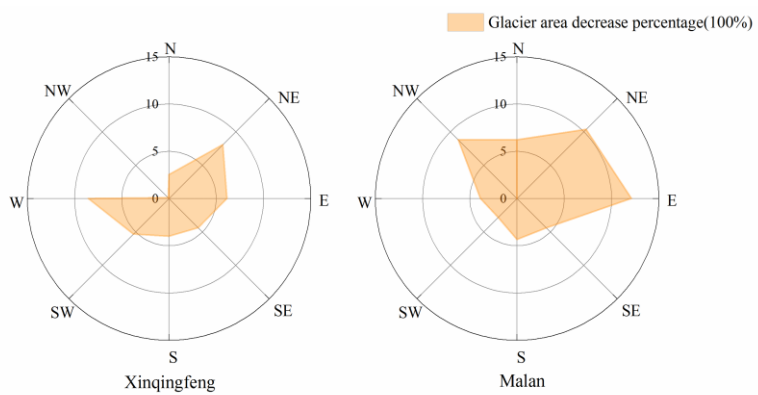

**Fig. 4: Glacier area decreases in different aspects at Xinqingfeng (Left) and Malan (Right).**

设置了格式: 字体: 加粗

带格式的: 左, 行距: 单倍行距

设置了格式: 字体: 加粗

带格式的: 正文

设置了格式: 字体: 加粗

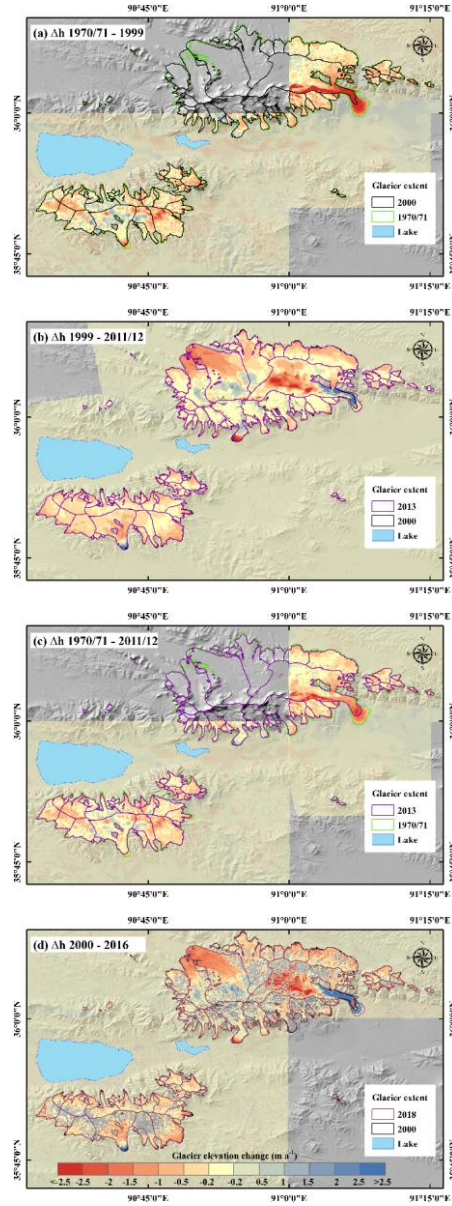

Fig-ure 5-4: Elevation change of glaciers in XM during 1970/71-1999 (a), 1999-2011/12 (b), 1970/71-2011/12 (c) and 2000-2016 (d). The data of Fig. 5-4 (d) was derived from Brun et al. (2017).

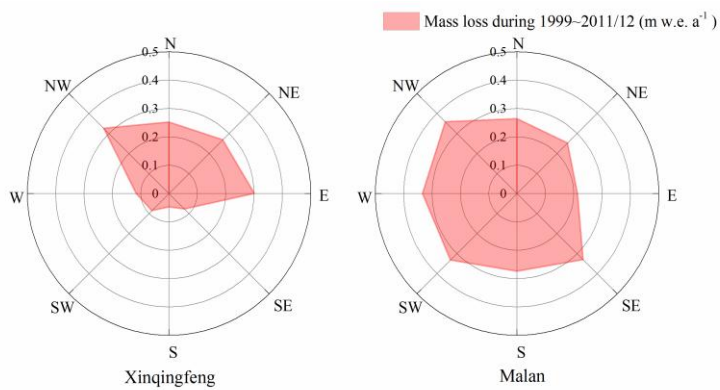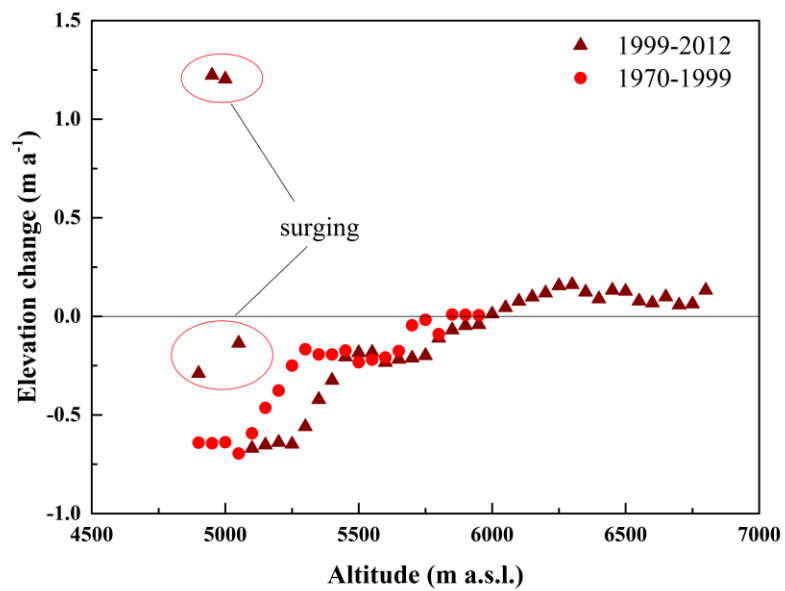

**Fig. 65: Altitude distributions of glacier thickness change separated into 50 m elevation bins between 1970-1999 and 1999-2012**  
**Glacier mass loss in different aspects at Xinqingfeng (Left) and Malan (Right) during 1999-2011/12.**

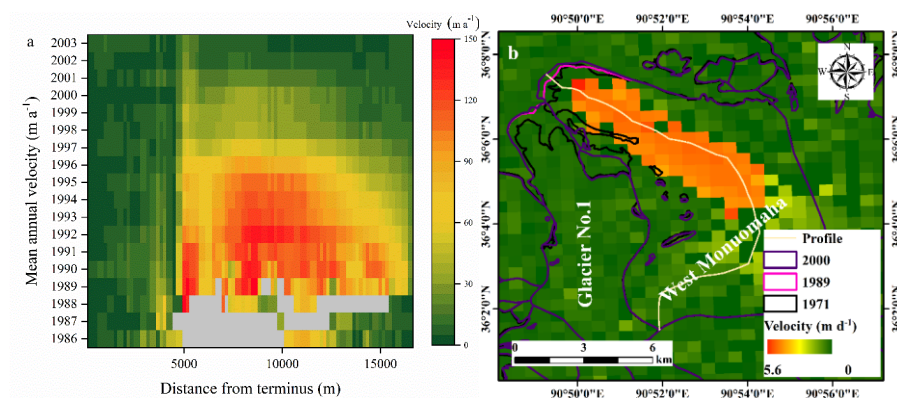

Figure 6. Panel (a) shows centre line annual velocity profiles from 1986-2003. (b) shows this glacier had a higher velocity from 12 October, 1987 to 29 November, 1987 with a maximum velocity of 5.6 m d<sup>-1</sup>.

设置了格式: 字体: 加粗

带格式的: 正文

设置了格式: 字体: 加粗

设置了格式: 字体: 加粗, 上标

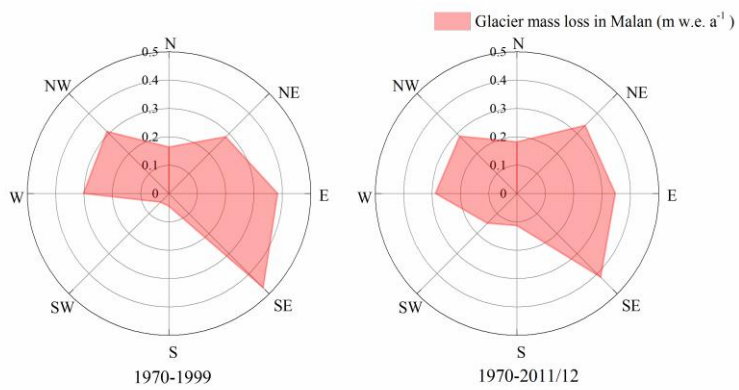

**Fig. 7: Glacier mass loss in different aspects at Malan during 1970-1999 (Left) and 1970-2011/12 (Right).**

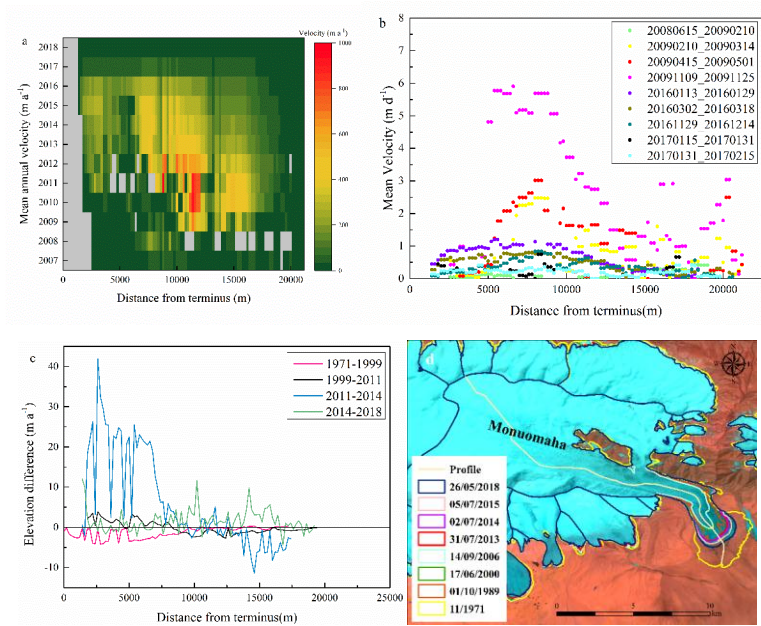

**Fig-ure 87:-** Panels (a) shows centre line annual velocity profiles from 2007-2018. (b) shows specific entre line velocity profiles with supplementary for (a). (c) shows - (c) show Maximum - (8a) and mean - (8b) - surface-velocity and elevation-difference - (8c) profiles of Monuomaha Glacier during different periods. The entre line profiles, derived from TOPO DEM data, follow the longitudinal-path from Fig-1. (d) shows glacier terminus change. Background image from Landsat 8 OLI of 26 May 2018.

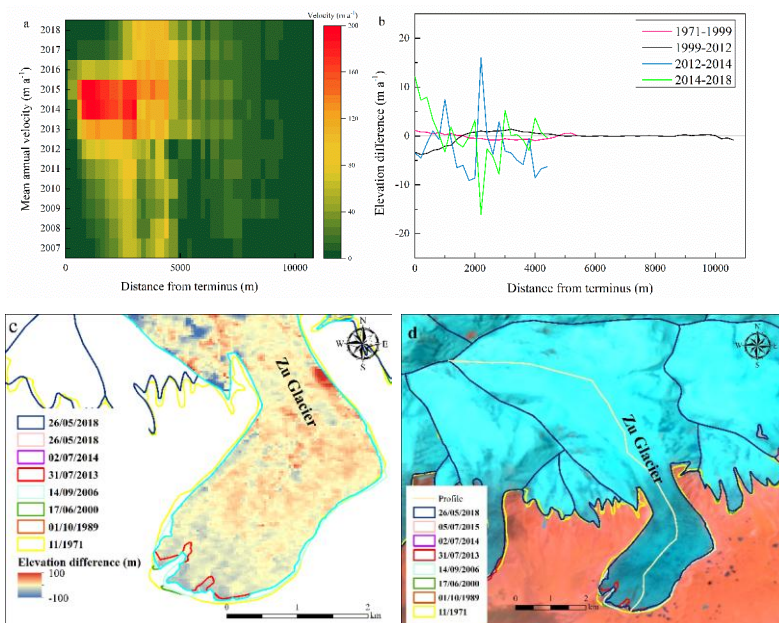

**Fig-9ure 8:** Panels (a) shows centre line annual velocity profiles from 2007-2018. (b) shows profiles of Monuomaha Glacier during different periods. (c) shows the elevation difference from 2014 to 2018. -(c) show Maximum -(8a) and mean -(8b) surface-velocity and elevation-difference -(8c) profiles of Zu Glacier during different periods. The profiles, derived from TOPO DEM data, follow the longitudinal path from Fig-1. (d) shows glacier terminus change. Background image from Landsat 8 OLI of 26 May 2018.

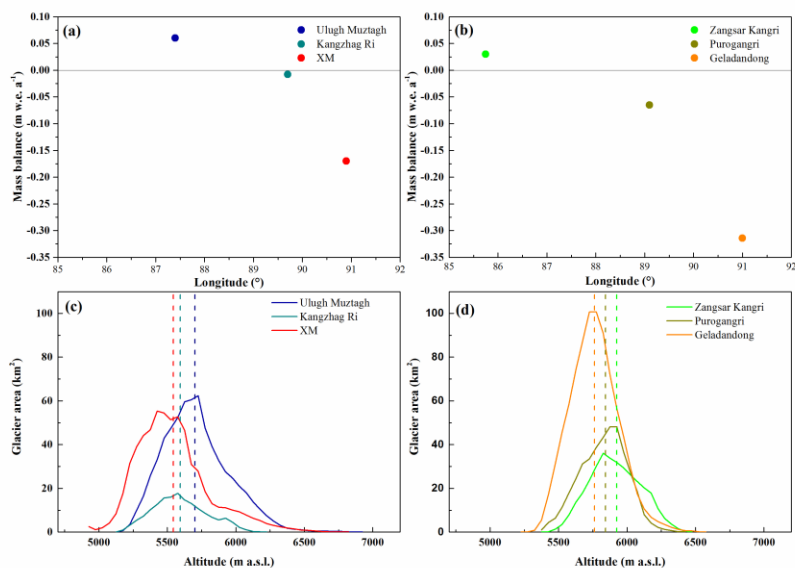

**Figure 9.** (a) Glacier mass balance in glacial clusters along approximately 35.5–36.5 °N, from 87 °E to 91 °E (Ulugh Muztagh, Kangzhag Ri, and XM). (b) Glacier mass balance in glacial clusters (Zangsar Kangri, Purogangri, and Geladandong) along approximately 33–34.5 °N, from 85.3 °E to 91.5 °E. (c-d) Hypsography of glacier for six clusters. Different colours indicate different clusters. The vertical dashed lines indicate their mean median elevation.

设置了格式: 字体: 加粗

设置了格式: 字体: 加粗

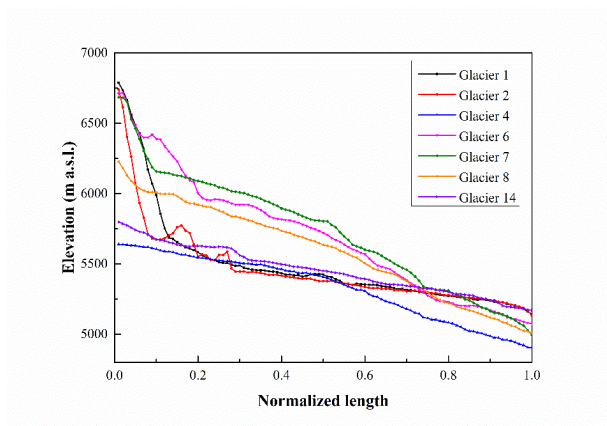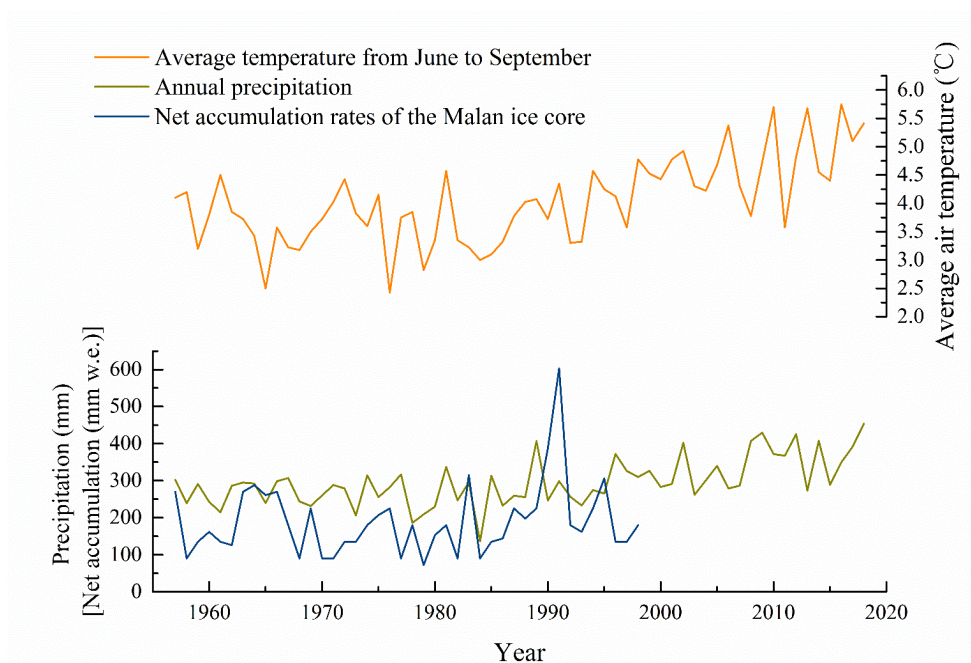

**Figure 10. Changes in the average air temperature (from June to September) and annual precipitation during 1957–2018 recorded at the Wudaoliang station. And the net accumulation recorded from Malan ice core.**Fig. 10: Elevation profiles of surged or advanced glaciers extracted from SRTM-DEM. The glacier length is derived from glacier inventory of 2000.

设置了格式: 字体: Times New Roman, 小五, 加粗, 字体颜色: 自动设置

**Table 1.** Detailed information about the data used in this study

| Source                       | Acquisition date | Space Resolution (m) | Usage                                  |
|------------------------------|------------------|----------------------|----------------------------------------|
| TerraSAR-X/TanDEM-X          | 8 Mar 2011       | 12                   | Estimation of glacier elevation change |
|                              | 5 Mar 2012       |                      |                                        |
|                              | 16 Mar 2012      |                      |                                        |
|                              | 29 Apr 2012      |                      |                                        |
| Topographic maps             | Oct 1970         |                      | Glacier identification                 |
|                              | Jan 1971         |                      |                                        |
|                              | Nov 1971         |                      |                                        |
|                              | Dec 1971         |                      |                                        |
| TOPO DEMs                    | Oct 1970         | 15                   | Estimation of glacier elevation change |
|                              | Nov 1971         |                      |                                        |
|                              | Dec 1971         |                      |                                        |
| ASTER DEMS (AST14DMO)        | 24 Jan 2014      | 15                   | Estimation of glacier elevation change |
|                              | 25 Apr 2018      |                      |                                        |
| SRTM DEM (C-band and X-band) | 11-22 Feb 2000   | 30                   | Estimation of glacier elevation change |
| Landsat 1~3/MSS              | 1972~1976        | 79                   | Glacier identification                 |
| Landsat 5/TM                 | 1986~2011        | 30                   | Glacier identification                 |
| Landsat 7/ETM+               | 2000~2012        | Pan: 15; MS: 30      | Glacier identification                 |
| Landsat 8/OLI                | 2013~2018        | Pan: 15; MS: 30      | Glacier identification                 |
| GoLIVE                       | 2013~2018        | 300                  | Glacier velocity                       |
| ITS LIVE                     | 1986-2018        | 480                  | Glacier velocity                       |

设置了格式: 字体: (中文) + 中文正文 (宋体), (中文) 中文(中国)

设置了格式: 字体: (中文) + 中文正文 (宋体), (中文) 中文(中国)

设置了格式: 字体: (中文) + 中文正文 (宋体), (中文) 中文(中国)

**Table 2.** The C band radar penetration depth caculating by three methods and comparsion with Zhou et al. (2009).

| Item               | Xinqingfeng | Malan | Total |
|--------------------|-------------|-------|-------|
| Method 1           | 3.74        | 3.58  | 3.69  |
| Method 2           | 4.42        | 4.45  | 4.43  |
| Method 3           |             |       | 3.66  |
| Zhou et al. (2019) | 3.43        | 3.26  |       |

带格式的: 左侧: 3.17 厘米, 右侧: 3.17 厘米, 顶端: 2.54 厘米, 底端: 2.54 厘米, 宽度: 21 厘米, 高度: 29.7 厘米

带格式的: 居中

设置了格式: 字体: (中文) + 中文正文 (宋体), (中文) 中文(中国)

设置了格式: 字体: (中文) + 中文正文 (宋体), (中文) 中文(中国)

带格式表格

带格式的: 居中

设置了格式: 字体: (中文) + 中文正文 (宋体), (中文) 中文(中国)

设置了格式: 字体: (中文) + 中文正文 (宋体), (中文) 中文(中国)

带格式的: 居中

设置了格式: 字体: (中文) + 中文正文 (宋体), (中文) 中文(中国)

带格式的: 居中

设置了格式: 字体: (中文) + 中文正文 (宋体), (中文) 中文(中国)

**Table 3.** Statistics of errors of elevation difference at off-glacier region between the TOPO, SRTM and TSX/TDX. MEAN is mean elevation difference, STDV is standard deviation.

| Item           | MEAN (m) | STDV (m) | MIN (m) | MAX (m) |
|----------------|----------|----------|---------|---------|
| SRTM-TOPO      | 0.49     | 10.20    | -91.12  | 96.40   |
| TSX/TDX - SRTM | -0.68    | 5.95     | -46.32  | 54.31   |
| TSX/TDX-TOPO   | -0.63    | 10.57    | -50.85  | 33.23   |

带格式的: 左, 行距: 单倍行距

**Table 24.** Glacier area (A) and changes ( $\Delta A$ ) from 1970–2018 for selected glaciers that have mass–balance estimates and for all glaciers of the study area.

| Region      | ID | GLIMS ID       | $A_{1970}$<br>(km <sup>2</sup> ) | 1970–2000                        |                   |                              | 2000–2013                        |                   |                              | 1970–2013                        |                   |                              | 2013–2018                        |                   |                              | 1970–2018                        |                   |                              |
|-------------|----|----------------|----------------------------------|----------------------------------|-------------------|------------------------------|----------------------------------|-------------------|------------------------------|----------------------------------|-------------------|------------------------------|----------------------------------|-------------------|------------------------------|----------------------------------|-------------------|------------------------------|
|             |    |                |                                  | $\Delta A$<br>(km <sup>2</sup> ) | $\Delta A$<br>(%) | Rate<br>(% a <sup>−1</sup> ) | $\Delta A$<br>(km <sup>2</sup> ) | $\Delta A$<br>(%) | Rate<br>(% a <sup>−1</sup> ) | $\Delta A$<br>(km <sup>2</sup> ) | $\Delta A$<br>(%) | Rate<br>(% a <sup>−1</sup> ) | $\Delta A$<br>(km <sup>2</sup> ) | $\Delta A$<br>(%) | Rate<br>(% a <sup>−1</sup> ) | $\Delta A$<br>(km <sup>2</sup> ) | $\Delta A$<br>(%) | Rate<br>(% a <sup>−1</sup> ) |
| Xinqingfeng | 1  | G090837E36060N | 26.7                             | 1.9                              | 7.2               | 0.23                         | −0.4                             | −1.4              | −0.11                        | 1.5                              | 5.5               | 0.13                         | −0.2                             | −0.6              | −0.11                        | 1.4                              | 4.9               | 0.11                         |
|             | 2  | G090884E36076N | 66.6                             | 2.4                              | 3.6               | 0.12                         | −0.4                             | −0.6              | −0.05                        | 2.0                              | 2.9               | 0.07                         | −0.0                             | −0.0              | −0.00                        | 2.0                              | 2.9               | 0.06                         |
|             | 3  | G091076E36106N | 27.2                             | −1.0                             | −3.5              | −0.12                        | −0.5                             | −1.9              | −0.15                        | −1.5                             | −5.6              | −0.13                        | −0.0                             | −0.2              | −0.03                        | −1.5                             | −5.8              | −0.12                        |
|             | 4  | G091032E36060N | 94.8                             | −10.8                            | −11.4             | −0.40                        | 3.6                              | 4.3               | 0.33                         | −7.2                             | −8.2              | −0.18                        | 1.5                              | 1.7               | 0.34                         | −5.7                             | −6.4              | −0.13                        |
|             | 5  | G090983E36018N | 22.2                             | −0.6                             | −2.6              | −0.09                        | −0.2                             | −1.1              | −0.09                        | −0.8                             | −3.9              | −0.09                        | −0.2                             | −0.8              | −0.17                        | −1.0                             | −4.7              | −0.10                        |
|             | 6  | G090901E36002N | 23.3                             | −0.4                             | −1.5              | −0.05                        | −0.3                             | −1.2              | −0.09                        | −0.6                             | −2.8              | −0.06                        | 0.1                              | 0.3               | 0.06                         | −0.5                             | −2.1              | −0.04                        |
|             | 7  | G090868E35998N | 8.5                              | −0.2                             | −2.4              | −0.08                        | 0.1                              | 1.1               | 0.08                         | −0.1                             | −1.4              | −0.03                        | −0.1                             | −1.0              | −0.19                        | −0.2                             | −2.4              | −0.05                        |
|             | 8  | G090846E36001N | 5.7                              | 0.0                              | 0.7               | 0.02                         | 0.0                              | 0.6               | 0.05                         | 0.1                              | 1.3               | 0.03                         | −0.0                             | −0.6              | −0.12                        | 0.0                              | 0.7               | 0.02                         |
| subtotal    |    |                | 443.0                            | −16.9                            | −3.8              | −0.13                        | −0.2                             | −0.0              | −0.00                        | −17.1                            | −3.9              | −0.09                        | 0.5                              | 0.1               | 0.02                         | −16.6                            | −3.7              | −0.08                        |
| Malan       | 9  | G090796E35893N | 5.3                              | −0.0                             | −0.8              | −0.03                        | −0.0                             | −0.7              | −0.06                        | −0.1                             | −1.5              | −0.04                        | −0.1                             | −1.2              | −0.25                        | −0.1                             | −2.8              | −0.06                        |
|             | 10 | G090781E35848N | 10.5                             | −0.4                             | −3.9              | −0.13                        | −0.0                             | −0.0              | −0.00                        | −0.4                             | −4.0              | −0.09                        | −0.0                             | −0.3              | −0.07                        | −0.4                             | −4.4              | −0.09                        |
|             | 11 | G090668E35840N | 10.9                             | −0.3                             | −2.9              | −0.10                        | −0.1                             | −1.2              | −0.09                        | −0.4                             | −4.3              | −0.10                        | −0.0                             | −0.2              | −0.03                        | −0.5                             | −4.4              | −0.09                        |
|             | 12 | G090621E35846N | 12.1                             | −0.4                             | −3.3              | −0.11                        | −0.1                             | −0.7              | −0.06                        | −0.5                             | −4.2              | −0.09                        | −0.0                             | −0.4              | −0.07                        | −0.5                             | −4.5              | −0.09                        |
|             | 13 | G090782E35805N | 23.0                             | −0.4                             | −1.8              | −0.06                        | −0.3                             | −1.1              | −0.09                        | −0.7                             | −3.0              | −0.07                        | −0.2                             | −0.9              | −0.17                        | −0.9                             | −3.8              | −0.08                        |
|             | 14 | G090693E35807N | 32.2                             | −1.7                             | −5.1              | −0.18                        | 0.2                              | 0.6               | 0.05                         | −1.5                             | −4.8              | −0.11                        | 0.0                              | 0.0               | 0.00                         | −1.5                             | −4.8              | −0.10                        |

|  |          |                |       |       |      |       |      |      |       |       |      |       |      |      |       |       |      |       |
|--|----------|----------------|-------|-------|------|-------|------|------|-------|-------|------|-------|------|------|-------|-------|------|-------|
|  | 15       | G090633E35808N | 14.5  | -0.2  | -1.3 | -0.04 | -0.1 | -0.5 | -0.04 | -0.3  | -1.8 | -0.04 | -0.0 | -0.2 | -0.03 | -0.3  | -2.0 | -0.04 |
|  | 16       | G090575E35839N | 9.2   | -0.2  | -2.2 | -0.07 | -0.0 | -0.5 | -0.04 | -0.3  | -2.8 | -0.06 | -0.0 | -0.1 | -0.02 | -0.3  | -2.9 | -0.06 |
|  | subtotal |                | 198.2 | -7.9  | -4.0 | -0.14 | -2.2 | -1.2 | -0.09 | -10.1 | -5.1 | -0.12 | -0.7 | -0.4 | -0.07 | -10.8 | -5.4 | -0.11 |
|  | total    |                | 641.2 | -24.8 | -3.9 | -0.13 | -2.3 | -0.4 | -0.03 | -27.2 | -4.2 | -0.10 | -0.2 | -0.0 | -0.01 | -27.4 | -4.3 | -0.09 |

**Table 35.** Glacier length ( $L$ ) and changes ( $\Delta L$ ) at Xinqingfeng and Malan for selected glaciers.

| Region      | ID                              | GLIMS ID       | $L_{1970/71}$ (km) | $\Delta L_{1970/71-2000}$ (m) | $\Delta L_{2000-2013}$ (m) | $\Delta L_{2013-2018}$ (m) | $\Delta L_{1970/71-2018}$ (m) |
|-------------|---------------------------------|----------------|--------------------|-------------------------------|----------------------------|----------------------------|-------------------------------|
| Xinqingfeng | 1                               | G090837E36060N | $12.05 \pm 0.01$   | $329.3 \pm 20.2$              | $0.0 \pm 16.8$             | $-83.2 \pm 10.6$           | $246.1 \pm 15.4$              |
|             | 2                               | G090884E36076N | $15.36 \pm 0.01$   | $584.8 \pm 20.2$              | $0.0 \pm 16.8$             | $0.0 \pm 10.6$             | $584.8 \pm 15.4$              |
|             | 3                               | G091076E36106N | $9.67 \pm 0.01$    | $-52.9 \pm 20.2$              | $0.0 \pm 16.8$             | $0.0 \pm 10.6$             | $-52.9 \pm 15.4$              |
|             | 4                               | G091032E36060N | $20.98 \pm 0.01$   | $-2546.8 \pm 20.2$            | $650.5 \pm 16.8$           | $513.5 \pm 10.6$           | $-1382.8 \pm 15.4$            |
|             | 5                               | G090983E36018N | $9.50 \pm 0.01$    | $-169.1 \pm 20.2$             | $-55.0 \pm 16.8$           | $-216.4 \pm 10.6$          | $-440.5 \pm 15.4$             |
|             | 6                               | G090901E36002N | $10.80 \pm 0.01$   | $-45.0 \pm 20.2$              | $-46.8 \pm 16.8$           | $46.0 \pm 10.6$            | $-45.8 \pm 15.4$              |
|             | 7                               | G090868E35998N | $6.90 \pm 0.01$    | $40.8 \pm 20.2$               | $107.8 \pm 16.8$           | $-43.4 \pm 10.6$           | $105.2 \pm 15.4$              |
|             | 8                               | G090846E36001N | $5.78 \pm 0.01$    | $432.0 \pm 20.2$              | $-19.7 \pm 16.8$           | $-75.7 \pm 10.6$           | $336.6 \pm 15.4$              |
|             | Selected glaciers (mean)        |                |                    | $-178.4 \pm 20.2$             | $79.6 \pm 16.8$            | $17.6 \pm 10.6$            | $-81.2 \pm 15.4$              |
|             | Selected glaciers (mean annual) |                |                    | $-5.9 \pm 0.7$                | $6.1 \pm 1.3$              | $3.5 \pm 2.1$              | $-1.7 \pm 0.3$                |
| Malan       | 9                               | G090796E35893N | $3.87 \pm 0.01$    | $0 \pm 20.2$                  | $-44.5 \pm 16.8$           | $-37.8 \pm 10.6$           | $-82.3 \pm 15.4$              |
|             | 10                              | G090781E35848N | $5.20 \pm 0.01$    | $-89.3 \pm 20.2$              | $-17.6 \pm 16.8$           | $-9.7 \pm 10.6$            | $-116.6 \pm 15.4$             |
|             | 11                              | G090668E35840N | $5.13 \pm 0.01$    | $-121.6 \pm 20.2$             | $-306.2 \pm 16.8$          | $-78.1 \pm 10.6$           | $-505.9 \pm 15.4$             |
|             | 12                              | G090621E35846N | $6.01 \pm 0.01$    | $-220.5 \pm 20.2$             | $-75.4 \pm 16.8$           | $-51.6 \pm 10.6$           | $-347.5 \pm 15.4$             |
|             | 13                              | G090782E35805N | $8.61 \pm 0.01$    | $-55.5 \pm 20.2$              | $-82.8 \pm 16.8$           | $-26.1 \pm 10.6$           | $-164.4 \pm 15.4$             |
|             | 14                              | G090693E35807N | $9.18 \pm 0.01$    | $-873.9 \pm 20.2$             | $183.4 \pm 16.8$           | $0.0 \pm 10.6$             | $-690.5 \pm 15.4$             |
|             | 15                              | G090633E35808N | $5.81 \pm 0.01$    | $-60.0 \pm 20.2$              | $-72.7 \pm 16.8$           | $-54.9 \pm 10.6$           | $-187.6 \pm 15.4$             |
|             | 16                              | G090575E35839N | $4.28 \pm 0.01$    | $-10.9 \pm 20.2$              | $-35.6 \pm 16.8$           | $-14.8 \pm 10.6$           | $-61.3 \pm 15.4$              |
|             | Selected glaciers (mean)        |                |                    | $-179.0 \pm 20.2$             | $-56.4 \pm 16.8$           | $-56.4 \pm 10.6$           | $-269.5 \pm 15.4$             |
|             | Selected glaciers (mean annual) |                |                    | $-6.0 \pm 0.7$                | $-4.3 \pm 1.3$             | $-11.3 \pm 2.1$            | $-5.6 \pm 0.3$                |
| Total       | Selected glaciers (mean)        |                |                    | $-178.7 \pm 20.2$             | $11.6 \pm 16.8$            | $-8.3 \pm 10.6$            | $-175.3 \pm 15.4$             |
|             | Selected glaciers (mean annual) |                |                    | $-6.0 \pm 0.7$                | $0.9 \pm 1.3$              | $-1.7 \pm 2.1$             | $-3.7 \pm 0.3$                |

**Table 46.** Glacier mean elevation ( $\Delta H$ ) and geodetic glacier mass balance rates measured from DEM differencing.

| Region      | ID | GLIMS ID       | 1970/71–1999           |                                                  | 1999–2011/12           |                                                  | 1970/71–2011/12        |                                                  | 2000–2016*                                       |
|-------------|----|----------------|------------------------|--------------------------------------------------|------------------------|--------------------------------------------------|------------------------|--------------------------------------------------|--------------------------------------------------|
|             |    |                | Mean $\Delta H$<br>(m) | Annual mass balance<br>(m w.e. a <sup>-1</sup> ) | Mean $\Delta H$<br>(m) | Annual mass balance<br>(m w.e. a <sup>-1</sup> ) | Mean $\Delta H$<br>(m) | Annual mass balance<br>(m w.e. a <sup>-1</sup> ) | Annual mass balance<br>(m w.e. a <sup>-1</sup> ) |
| Xinqingfeng | 1  | G090837E36060N |                        |                                                  | -4.41 ± 2.26           | -0.29 ± 0.18                                     |                        |                                                  | -0.22                                            |
|             | 2  | G090884E36076N |                        |                                                  | -5.97 ± 2.32           | -0.39 ± 0.18                                     |                        |                                                  | -0.33                                            |
|             | 3  | G091076E36106N | -4.44 ± 2.75           | -0.13 ± 0.09                                     | -4.41 ± 2.00           | -0.31 ± 0.15                                     | -8.65 ± 0.91           | -0.17 ± 0.02                                     | -0.40                                            |
|             | 4  | G091032E36060N |                        |                                                  | -4.77 ± 2.16           | -0.34 ± 0.17                                     |                        |                                                  | -0.02                                            |
|             | 5  | G090983E36018N |                        |                                                  | 1.43 ± 2.11            | 0.10 ± 0.16                                      |                        |                                                  | 0.04                                             |
|             | 6  | G090901E36002N |                        |                                                  | 1.02 ± 2.12            | 0.07 ± 0.16                                      |                        |                                                  | 0.05                                             |
|             | 7  | G090868E35998N |                        |                                                  | 0.15 ± 2.09            | 0.01 ± 0.16                                      |                        |                                                  | 0.02                                             |
|             | 8  | G090846E36001N |                        |                                                  | -0.35 ± 2.00           | -0.02 ± 0.15                                     |                        |                                                  | 0.04                                             |
| subtotal    |    |                |                        |                                                  | -3.50 ± 2.17           | -0.22 ± 0.17                                     |                        |                                                  | -0.14                                            |
| Malan       | 9  | G090796E35893N | -3.21 ± 3.71           | -0.09 ± 0.13                                     | -4.41 ± 2.15           | -0.29 ± 0.17                                     | -7.85 ± 0.84           | -0.16 ± 0.02                                     | -0.20                                            |
|             | 10 | G090781E35848N | -7.17 ± 3.48           | -0.21 ± 0.12                                     | -3.96 ± 2.11           | -0.26 ± 0.17                                     | -10.40 ± 0.85          | -0.21 ± 0.02                                     | -0.25                                            |
|             | 11 | G090668E35840N | -8.00 ± 3.90           | -0.23 ± 0.13                                     | -2.79 ± 2.25           | -0.18 ± 0.18                                     | -10.85 ± 0.81          | -0.22 ± 0.02                                     | -0.08                                            |
|             | 12 | G090621E35846N | -12.37 ± 4.28          | -0.36 ± 0.15                                     | -4.72 ± 2.24           | -0.31 ± 0.18                                     | -18.65 ± 0.81          | -0.38 ± 0.02                                     | -0.27                                            |
|             | 13 | G090782E35805N | -16.41 ± 3.89          | -0.48 ± 0.13                                     | -5.22 ± 2.23           | -0.34 ± 0.18                                     | -20.99 ± 0.83          | -0.42 ± 0.02                                     | -0.39                                            |
|             | 14 | G090693E35807N | 0.84 ± 3.96            | 0.02 ± 0.14                                      | -4.36 ± 2.25           | -0.29 ± 0.18                                     | -3.35 ± 0.81           | -0.07 ± 0.02                                     | -0.17                                            |
|             | 15 | G090633E35808N | 0.04 ± 4.49            | 0.00 ± 0.15                                      | -5.26 ± 2.33           | -0.34 ± 0.18                                     | -5.71 ± 0.80           | -0.12 ± 0.02                                     | -0.14                                            |
|             | 16 | G090575E35839N | -9.46 ± 3.86           | -0.28 ± 0.13                                     | -5.92 ± 2.12           | -0.39 ± 0.17                                     | -13.47 ± 0.84          | -0.27 ± 0.02                                     | -0.39                                            |
| subtotal    |    |                | -6.53 ± 3.95           | -0.19 ± 0.14                                     | -4.42 ± 2.21           | -0.29 ± 0.17                                     | -10.72 ± 0.91          | -0.22 ± 0.02                                     | -0.23                                            |
| total       |    |                |                        |                                                  | -3.78 ± 2.18           | -0.24 ± 0.17                                     |                        |                                                  | -0.17                                            |

\*These results were derived from Brun et al. (2017).

**Table 57.** Main characteristics of ~~surged~~surging or ~~advanced~~advancing glaciers.

| Region      | ID | GLIMS ID       | Advance<br>period | Advance<br>(m) | Advance<br>rate (m a <sup>-1</sup> ) | Relative<br>length<br>change(%) | Mean<br>slope(°) | Aspect |
|-------------|----|----------------|-------------------|----------------|--------------------------------------|---------------------------------|------------------|--------|
| Xinqingfeng | 1  | G090837E36060N | 1971-1987         | 278.4          | 17.4                                 | 2.3                             | 13.5             | N      |
|             |    |                | 1989-1999         | 50.9           | 5.1                                  | 0.4                             |                  |        |
|             | 2  | G090884E36076N | 1987-1989         | 1200.0         | 600.0                                | 7.8                             | 9.2              | NW     |
|             |    |                | 1990-1998         | 256.0          | 32.0                                 | 1.7                             |                  |        |
|             | 4  | G091032E36060N | 2009-2016         | 1164.0         | 194.0                                | 5.5                             | 10.1             | E      |
|             | 6  | G090901E36002N | 2014-2016         | 46.0           | 23.0                                 | 0.4                             | 17.7             | S      |
|             | 7  | G090868E35998N | 1986-1989         | 40.8           | 13.6                                 | 0.6                             | 21.5             | S      |
|             |    |                | 2009-2010         | 107.8          | 107.8                                | 1.6                             |                  |        |
|             | 8  | G090846E36001N | 1970-1986         | 663.0          | 41.4                                 | 11.5                            | 21.9             | S      |
| Malan       | 14 | G090693E35807N | 2007-2012         | 260.5          | 52.1                                 | 2.8                             | 7.6              | S      |



- Bahr, D. B. and Radić, V.: Significant contribution to total mass from very small glaciers, *The Cryosphere*, 6, 763–770, 2012.
- Bao, W., Liu, S., Wei, J., and Guo, W.: Glacier changes during the past 40 years in the West Kunlun Shan, *J Mt Sci Engl*, 12, 344–357, 2015.
- 5 Berthier, E., Arnaud, Y., Vincent, C., and Rémy, F.: Biases of SRTM in high mountain areas: Implications for the monitoring of glacier volume changes, *Geophysical Research Letters*, 33, L08502, 2006.
- Berthier, E., Cabot, V., Vincent, C., and Six, D.: Decadal Region-Wide and Glacier-Wide Mass Balances Derived from Multi-Temporal ASTER Satellite Digital Elevation Models: Validation over the Mont-Blanc Area, *Frontiers in Earth Science*, 4, 2016.
- 10 Björnsson, H.: Hydrological characteristics of the drainage system beneath a surging glacier, *Nature*, 395, 771–774, 1998.
- Bolch, T., Pieczonka, T., and Benn, D. I.: Multi-decadal mass loss of glaciers in the Everest area (Nepal Himalaya) derived from stereo imagery, *Cryosphere*, 5, 349–358, 2011.
- Bolch, T., Pieczonka, T., Mukherjee, K., and Shea, J.: Brief communication: Glaciers in the Hunza catchment (Karakoram) have been nearly in balance since the 1970s, *The Cryosphere*, 11, 531–539, 2017.
- 15 Brun, F., Berthier, E., Wagnon, P., Kaab, A., and Treichler, D.: A spatially resolved estimate of High Mountain Asia glacier mass balances, 2000–2016, *Nat Geosci*, 10, 668–673, 2017.
- Burgess, E. W., Forster, R. R., Larsen, C. F., and Braun, M.: Surge dynamics on Bering Glacier, Alaska, in 2008–2011, *The Cryosphere*, 6, 1251–1262, 2012.
- 20 Chen, A.-a., Wang, N., Li, Z., Wu, Y., Zhang, W., and Guo, Z.: Region-Wide Glacier Mass Budgets for the Tanggula Mountains between ~1969 and ~2015 Derived from Remote-Sensing Data, *Arctic, Antarctic, and Alpine Research*, 49, 551–568, 2017.
- Clarke, G. K. C., Collins, S. G., and Thompson, D. E.: Flow, Thermal Structure, and Subglacial Conditions of a Surge-Type Glacier, *Canadian Journal of Earth Sciences*, 21, 232–240, 1984.
- 25 Costantini, M.: A Novel Phase Unwrapping Method Based on Network Programming, *Ieee T Geosci Remote*, 36, 813–821, 1998.
- Davis, C. H. and Poznyak, V. I.: The depth of penetration in Antarctic firn at 10 GHz, *Ieee T Geosci Remote*, 31, 1107–1111, 1993.
- Fahnestock, M., Scambos, T., Moon, T., Gardner, A., Haran, T., and Klinger, M.: Rapid large-area mapping of ice flow using Landsat 8, *Remote Sensing of Environment*, 185, 84–94, 2016.
- 30 Falaschi, D., Bolch, T., Lenzano, M. G., Tadono, T., Lo Vecchio, A., and Lenzano, L.: New evidence of glacier surges in the Central Andes of Argentina and Chile, *Progress in Physical Geography: Earth and Environment*, 42, 792–825, 2018.
- Farinotti, D., Longuevergne, L., Moholdt, G., Duethmann, D., Molg, T., Bolch, T., Vorogushyn, S., and Guntner, A.: Substantial glacier mass loss in the Tien Shan over the past 50 years, *Nat Geosci*, 8, 716–, 2015.
- 35 Fischer, M., Huss, M., and Hoelzle, M.: Surface elevation and mass changes of all Swiss glaciers 1980–2010, *The Cryosphere*, 9, 525–540, 2015.
- Fowler, A. C., Murray, T., and Ng, F. S. L.: Thermally-controlled glacier surging—, *Journal of Glaciology*, 47, 527–538, 2001.
- Gardelle, J., Berthier, E., and Arnaud, Y.: Impact of resolution and radar penetration on glacier elevation changes computed from DEM differencing, *Journal of Glaciology*, 58, 419–422, 2012a.
- 40 Gardelle, J., Berthier, E., and Arnaud, Y.: Slight mass gain of Karakoram glaciers in the early twenty-first century, *Nat Geosci*, 5, 322–325, 2012b.
- Gardelle, J., Berthier, E., Arnaud, Y., and Käab, A.: Region-wide glacier mass balances over the Pamir-Karakoram-Himalaya during 1999–2011, *The Cryosphere*, 7, 1263–1286, 2013.
- 45 Gardner, A. S., Moholdt, G., Cogley, J. G., Wouters, B., Arendt, A. A., Wahr, J., Berthier, E., Hoek, R., Pfeffer, W. T., Kaser, G., Ligtenberg, S. R., Bolch, T., Sharp, M. J., Hagen, J. O., van den Broeke, M. R., and Paul, F.: A reconciled estimate of glacier contributions to sea level rise: 2003 to 2009, *Science*, 340, 852–857, 2013.
- Gardner, A. S., Moholdt, G., Scambos, T., Fahnestock, M., Ligtenberg, S., van den Broeke, M., and Nilsson, J.: Increased West Antarctic and unchanged East Antarctic ice discharge over the last 7 years, *The Cryosphere*, 12, 521–547, 2018.

- GB/T12343.1-2008: Compilation Specifications for National Fundamental Scale Mapse——Part 1: Compilation Specifications for 1:25000/1:50000/1:100000 Topographic Maps. General Administration of Quality Supervision Inspection and Quarantine, Beijing, 2008.
- Guo, W., Liu, S., Xu, J., Wu, L., Shangguan, D., Yao, X., Wei, J., Bao, W., Yu, P., Liu, Q., and Jiang, Z.: The second Chinese glacier inventory: data, methods and results, *Journal of Glaciology*, 61, 357–372, 2015.
- 5 Guo, W., Q., Liu, S., Y., Wei, J. F., and Bao, W. J.: The 2008/09 surge of central Yulinhuan glacier, northern Tibetan Plateau, as monitored by remote sensing, *Annals of Glaciology*, 54, 299–310, 2013.
- Holzer, N., Vijay, S., Yao, T., Xu, B., Buchroithner, M., and Bolch, T.: Four decades of glacier variations at Muztagh Ata (eastern Pamir): a multi-sensor study including Hexagon KH-9 and Pléiades data, *The Cryosphere*, 9, 2071–2088, 2015.
- 10 Huss, M.: Density assumptions for converting geodetic glacier volume change to mass change, *The Cryosphere*, 7, 877–887, 2013.
- Immerzeel, W. W., van Beek, L. P., and Bierkens, M. F.: Climate change will affect the Asian water towers, *Science*, 328, 1382–1385, 2010.
- Jiang, Z., Liu, S., Guo, W., Li, J., Long, S., Wang, X., Wei, J., Zhang, Z., and Wu, K.: Recent surface elevation changes of three representative glaciers in Anyemaqen Mountains, source region of Yellow River, *Journal of Glaciology and Geocryology*, 40, 231–237, 2018.
- 15 Käab, A., Berthier, E., Nuth, C., Gardelle, J., and Arnaud, Y.: Contrasting patterns of early twenty-first century glacier mass change in the Himalayas, *Nature*, 488, 495–498, 2012.
- Käab, A., Treichler, D., Nuth, C., and Berthier, E.: Brief Communication: Contending estimates of 2003–2008 glacier mass balance over the Pamir–Karakoram–Himalaya, *The Cryosphere*, 9, 557–564, 2015.
- 20 Kamb, B., Raymond, C. F., Harrison, W. D., Engelhardt, H., Echelmeyer, K. A., Humphrey, N., Brugman, M. M., and Pfeffer, T.: Glacier Surge Mechanism—1982–1983 Surge of Variegated Glacier, Alaska, *Science*, 227, 469–479, 1985.
- Kamp, U., Bolch, T., and Olsenholler, J.: DEM-generation from ASTER satellite data for geomorphometric analysis of Cerro Sillajhuay, Chile/Bolivia, *ASPRS 2003 Annual Conference Proceedings*, Anchorage, Alaska, 2003.
- 25 Kotlyakov, V. M., Rototava, O. V., and Nosenko, G. A.: The September 2002 Kolka Glacier Catastrophe in North-Ossetia, Russian Federation: Evidence and Analysis, *Mountain Research and Development*, 24, 78–83, 2004.
- Krieger, G., Moreira, A., Fiedler, H., Hajnsek, I., Werner, M., Younis, M., and Zink, M.: TanDEM-X: A Satellite Formation for High-Resolution SAR Interferometry, *IEEE T Geosci Remote*, 45, 3317–3341, 2007.
- Lambrecht, A., Mayer, C., Wendt, A., Floricioiu, D., and Volksen, C.: Elevation change of Fedchenko Glacier, Pamir Mountains, from GNSS field measurements and TanDEM-X elevation models, with a focus on the upper glacier, *Journal of Glaciology*, 64, 637–648, 2018.
- 30 Li, B.: *Nature Environment in the Hoh Xil Region of Qinghai*, Science Press, Beijing, 1996.
- Lin, H., Li, G., Cuo, L., Hooper, A., and Ye, Q.: A decreasing glacier mass balance gradient from the edge of the Upper Tarim Basin to the Karakoram during 2000–2014, *Scientific reports*, 7, 6712, 2017.
- 35 Lingle, C. S. and Fatland, D. R.: Does englacial water storage drive temperate glacier surges?, *Annals of Glaciology*, 36, 14–20, 2003.
- Liu, L., Jiang, L., Jiang, H., Wang, H., Ma, N., and Xu, H.: Accelerated glacier mass loss (2011–2016) over the Puruogangri ice field in the inner Tibetan Plateau revealed by bistatic InSAR measurements, *Remote Sensing of Environment*, 231, 111241, 2019.
- 40 Liu, Q., Guo, W., Nie, Y., Liu, S., and Xu, J.: Recent glacier and glacial lake changes and their interactions in the Bugyai Kangri, southeast Tibet, *Annals of Glaciology*, doi: 10.3189/2016AoG71A415, 2015–2015.
- Motyka, R. J. and Truffer, M.: Hubbard Glacier, Alaska: 2002 closure and outburst of Russell Fjord and postflood conditions at Gilbert Point, *Journal of Geophysical Research*, 112, F02004, 2007.
- Mukherjee, K., Bolch, T., Goerlich, F., Kutuzov, S., Osmonov, A., Pieczonka, T., and Shesterova, I.: Surge-Type Glaciers in the Tien Shan (Central Asia), Arctic, Antarctic, and Alpine Research, 49, 147–171, 2018.
- 45 Murray, T., Stuart, G. W., Miller, P. J., Woodward, J., Smith, A. M., Porter, P. R., and Jiskoot, H.: Glacier surge propagation by thermal evolution at the bed, *Journal of Geophysical Research*, 105, 13491, 2000.
- Neckel, N., Braun, A., Kropáček, J., and Hochschild, V.: Recent mass balance of the Purogangri Ice Cap, central Tibetan Plateau, by means of differential X-band SAR interferometry, *The Cryosphere*, 7, 1623–1633, 2013.
- 50 Neckel, N., Kropáček, J., Bolch, T., and Hochschild, V.: Glacier mass changes on the Tibetan Plateau 2003–2009 derived

- from ICESat-laser altimetry measurements, *Environmental Research Letters*, 9, 1-7, 2014.
- Nuth, C. and Kääb, A.: Co-registration and bias corrections of satellite elevation data sets for quantifying glacier thickness change, *The Cryosphere*, 5, 271-290, 2011.
- Pu, J., Yao, T., Wang, N., Ding, L., and Zhang, Q.: Recent Variation of the Malan Glacier in Hoh-Xil Region of the Tibetan Plateau, *Journal of Glaciology and Geocryology*, 23, 189-192, 2001.
- 5 Qiao, C.: Remote Sensing Monitoring of Glacier Changes in Dongkemadi Region of Tanggula Mountain, *Journal of Anhui Agricultural Sciences*, 38, 7703-7705, 2010.
- Quincey, D. J., Glasser, N. F., Cook, S. J., and Luckman, A.: Heterogeneity in Karakoram glacier surges, *Journal of Geophysical Research: Earth Surface*, 120, 1288-1300, 2015.
- 10 Round, V., Leinss, S., Huss, M., Haemmig, C., and Hajnsek, I.: Surge dynamics and lake outbursts of Kyagar Glacier, Karakoram, *The Cryosphere*, 11, 723-739, 2017.
- Sakai, A., Nuimura, T., Fujita, K., Takenaka, S., Nagai, H., and Lamsal, D.: Climate regime of Asian glaciers revealed by GAMDAM glacier inventory, *The Cryosphere*, 9, 865-880, 2015.
- Sam, L., Bhardwaj, A., Kumar, R., Buchroithner, M. F., and Martin-Torres, F. J.: Heterogeneity in topographic control on velocities of Western Himalayan glaciers, *Scientific reports*, 8, 12843, 2018.
- 15 Sevestre, H. and Benn, D. I.: Climatic and geometric controls on the global distribution of surge-type glaciers: implications for a unifying model of surging, *Journal of Glaciology*, 61, 646-662, 2015.
- Sevestre, H., Benn, D. I., Hulton, N. R. J., and Bælum, K.: Thermal structure of Svalbard glaciers and implications for thermal switch models of glacier surging, *Journal of Geophysical Research: Earth Surface*, 120, 2220-2236, 2015.
- 20 Shangguan, D. H., Boleh, T., Ding, Y. J., Kröhnert, M., Pieczonka, T., Wetzel, H. U., and Liu, S. Y.: Mass changes of Southern and Northern Inylchek Glacier, Central Tian-Shan, Kyrgyzstan, during ~1975 and 2007 derived from remote sensing data, *The Cryosphere*, 9, 703-717, 2015.
- Sun, M., Liu, S., Yao, X., Guo, W., and Xu, J.: Glacier changes in the Qilian Mountains in the past half-century: Based on the revised First and Second Chinese Glacier Inventory, *J Geogr Sci*, 28, 206-220, 2018.
- 25 Surdyk, S.: Using microwave brightness temperature to detect short term surface air temperature changes in Antarctica: An analytical approach, *Remote Sensing of Environment*, 80, 256-271, 2002.
- Wang, D. and Kääb, A.: Modeling Glacier Elevation Change from DEM Time Series, *Remote Sensing*, 7, 10117-10142, 2015.
- Wang, H., Hu, J., Tan, q., and Xu, X.: Evaluation of the contour line interpolation generated DEMs of mountainous area in north China, *Contributions to Geology and Mineral Resources Research*, 29, 433-437, 2014.
- 30 Wang, N.: Variations in net accumulation rate of the malan ice core from the northern tibetan plateau over the period of 1887 though 1998 and their relationship to solar activity, *Quaternary Sciences*, 29, 913-919, 2009.
- Wang, Y., Pu, J., Zhang, Y., and Sun, W.: Characteristic of Present Warming Change Recorded in Malan Ice Core, Central Tibetan Plateau, *Journal of Glaciology and Geocryology*, 25, 130-134, 2003.
- 35 Wang, Y., Wu, L., Xu, J., and Liu, S.: Variation and uncertainty analysis of the glaciers in the past 50 years in Geladandong of Tibetan Plateau, *Journal of Glaciology and Geocryology*, 35, 255-262, 2013.
- Wei, J., Liu, S., Guo, W., Xu, J., Bao, W., and Shangguan, D.: Changes in Glacier Volume in the North Bank of the Bangong Co-Basin from 1968 to 2007 Based on Historical Topographic Maps, SRTM, and ASTER Stereo Images, *Arctic, Antarctic, and Alpine Research*, 47, 301-311, 2015a.
- 40 Wei, J., Liu, S., Xu, J., Guo, W., Bao, W., Shangguan, D., and Jiang, Z.: Mass Loss from Glaciers in the Chinese Altai Mountains between 1959 and 2008 Revealed Based on Historical Maps, SRTM, and ASTER Images, *J Mt Sci Engl*, 12, 330-343, 2015b.
- Wei, J. F., Liu, S. Y., Guo, W. Q., Yao, X. J., Xu, J. L., Bao, W. J., and Jiang, Z. L.: Surface-area changes of glaciers in the Tibetan Plateau interior area since the 1970s using recent Landsat images and historical maps, *Annals of Glaciology*, 55, 213-222, 2014.
- 45 Wu, K., Liu, S., Guo, W., Wei, J., Xu, J., Bao, W., and Yao, X.: Glacier change in the western Nyainqentanglha Range, Tibetan Plateau using historical maps and Landsat imagery: 1970-2014, *J Mt Sci Engl*, 13, 1358-1374, 2016.
- Wu, K., Liu, S., Jiang, Z., Xu, J., Wei, J., and Guo, W.: Recent glacier mass balance and area changes in the Kangri Karpo Mountains from DEMs and glacier inventories, *The Cryosphere*, 12, 103-121, 2018.
- 50 Xie, Z., Han, J., Feng, Q., and Wang, X.: Primary Study on the Glaciers of Mountain Malan, Hoh-Xil Region, Qinghai-

- Xizang Plateau, *Journal of Natural Science of Hunan Normal University*, 23, 83–88, 2000.
- Xu, J., Shangguan, D., and Wang, J.: Three-Dimensional Glacier Changes in Geladandong Peak Region in the Central Tibetan Plateau, *Water*, 10, 1749, 2018.
- 5 Yao, T. D., Thompson, L., Yang, W., Yu, W. S., Gao, Y., Guo, X. J., Yang, X. X., Duan, K. Q., Zhao, H. B., Xu, B. Q., Pu, J. C., Lu, A. X., Xiang, Y., Kattel, D. B., and Joswiak, D.: Different glacier status with atmospheric circulations in Tibetan Plateau and surroundings, *Nat Clim Change*, 2, 663–667, 2012.
- Yao, X., Liu, S., Zhu, Y., Gong, P., An, L., and Li, X.: Design and implementation of an automatic method for deriving glacier centerlines based on GIS, *Journal of Glaciology and Geocryology*, 37, 1563–1570, 2015.
- 10 Ye, Q., Zong, J., Tian, L., Cogley, J. G., Song, C., and Guo, W.: Glacier changes on the Tibetan Plateau derived from Landsat imagery: mid-1970s–2000–13, *Journal of Glaciology*, 63, 273–287, 2017.
- Zhang, W.: A Surging Glacier in the Nanjiabawa Peak Area, Himalayas, *Journal of Glaciology and Geocryology*, 5, 75–76, 1983.
- Zhang, Z. and Liu, S.: Area changes and mass balance of glaciers in KangzhagRi of the Tibetan Plateau from 1970 to 2016 as derived from remote Sensing data, *Journal of Geo-information Science*, 20, 1338–1349, 2018.
- 15 Zhang, Z., Liu, S., Wei, J., Xu, J., Guo, W., Bao, W., and Jiang, Z.: Mass Change of Glaciers in Muztag-Ata-Kongur-Tagh, Eastern Pamir, China from 1971/76 to 2013/14 as Derived from Remote Sensing Data, *PloS one*, 11, e0147327, 2016.
- Zhang, Z., Liu, S., Zhang, Y., Wei, J., Jiang, Z., and Wu, K.: Glacier variations at Aru Co in western Tibet from 1971 to 2016 derived from remote-sensing data, *Journal of Glaciology*, 64, 397–406, 2018.
- 20 Zhou, Y. S., Hu, J., Li, Z. W., Li, J., Zhao, R., and Ding, X. L.: Quantifying glacier mass change and its contribution to lake growths in central Kunlun during 2000–2015 from multi-source remote-sensing data, *Journal of Hydrology*, 570, 38–50, 2019.
