# Supplementary material for: Glacier changes and surges over Xinqingfeng and Malan Ice Caps in the inner Tibetan Plateau since 1970 derived from Remote Sensing Data
Source: Copernicus journal article supplement (doi:10.5194/tc-2019-94), 2019-05-15
Supplement: Supplementary file [file tc-2019-94-AC1-supplement.zip]

## Supplement

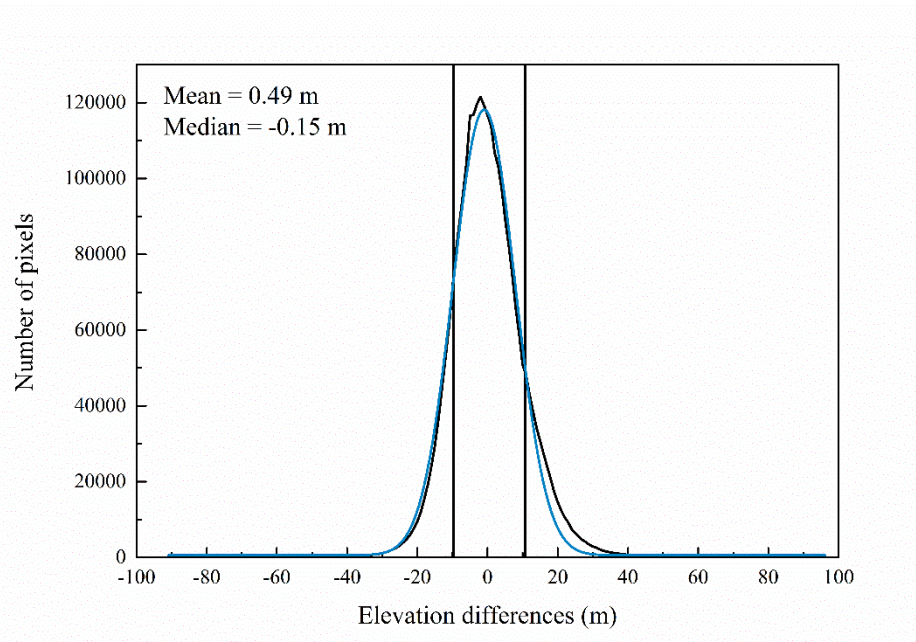

**Figure S1. Distribution of elevation differences (black line) between TOPO and SRTM on the ice-free terrain after planimetric and vertical adjustment of the DEMs. The blue line represents the corresponding gaussian fit. The vertical lines represent the standard deviation of elevation differences.**

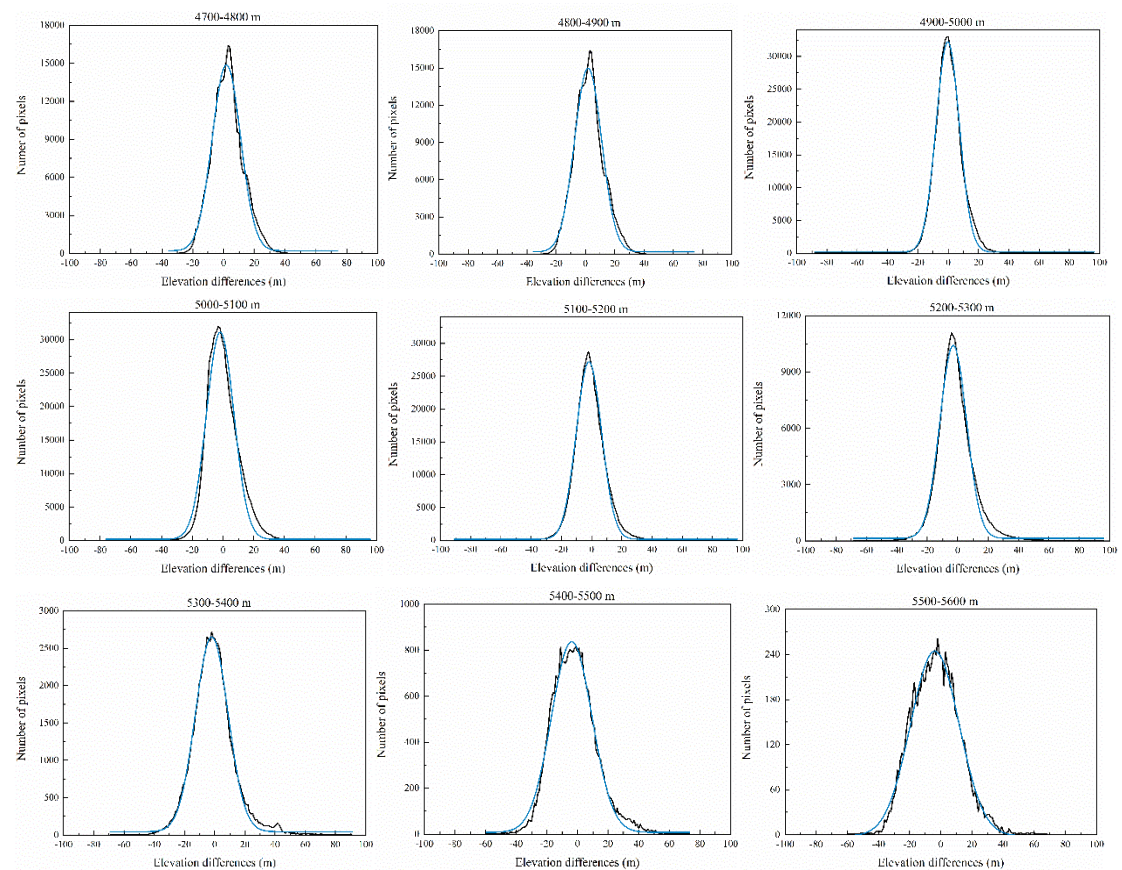

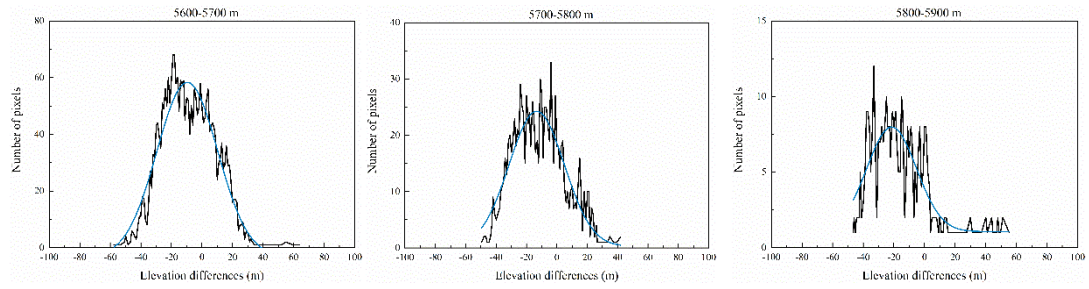

**Figure S2.** Distribution of elevation changes between TOPO and SRTM (black line) in each altitude interval. The blue line represents the corresponding gaussian fit.

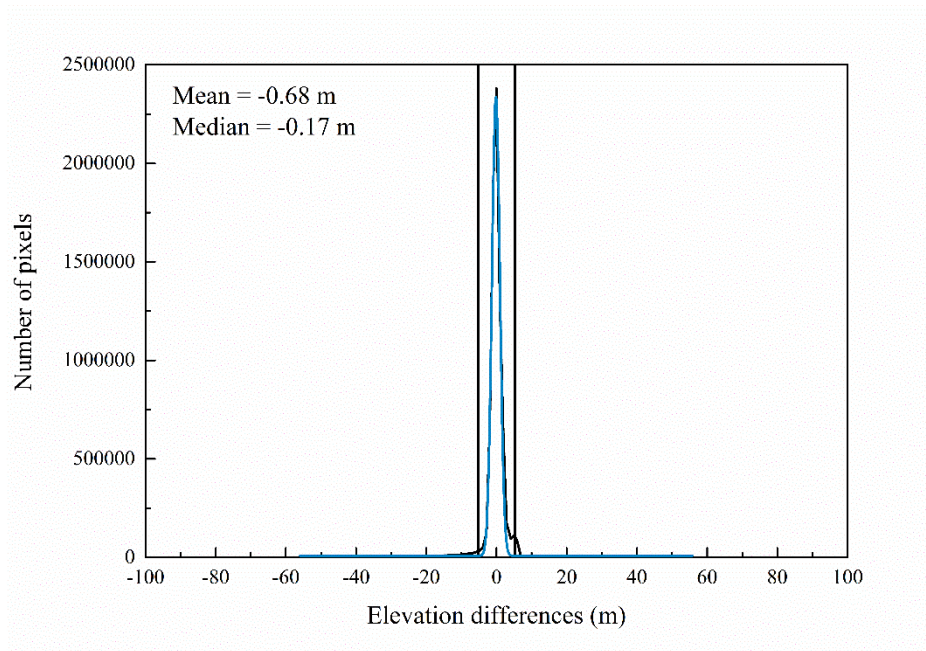

**Figure S3.** Distribution of elevation differences (black line) between TSX/TDX-X and SRTM on the ice-free terrain after planimetric and vertical adjustment of the DEMs. The blue line represents the corresponding gaussian fit. The vertical lines represent the standard deviation of elevation differences.

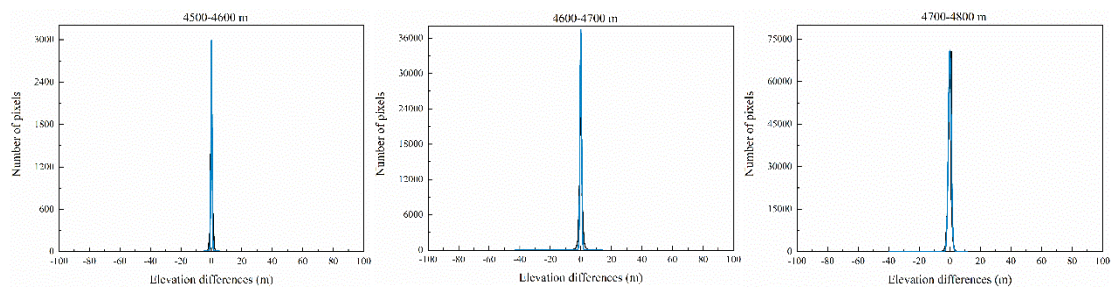



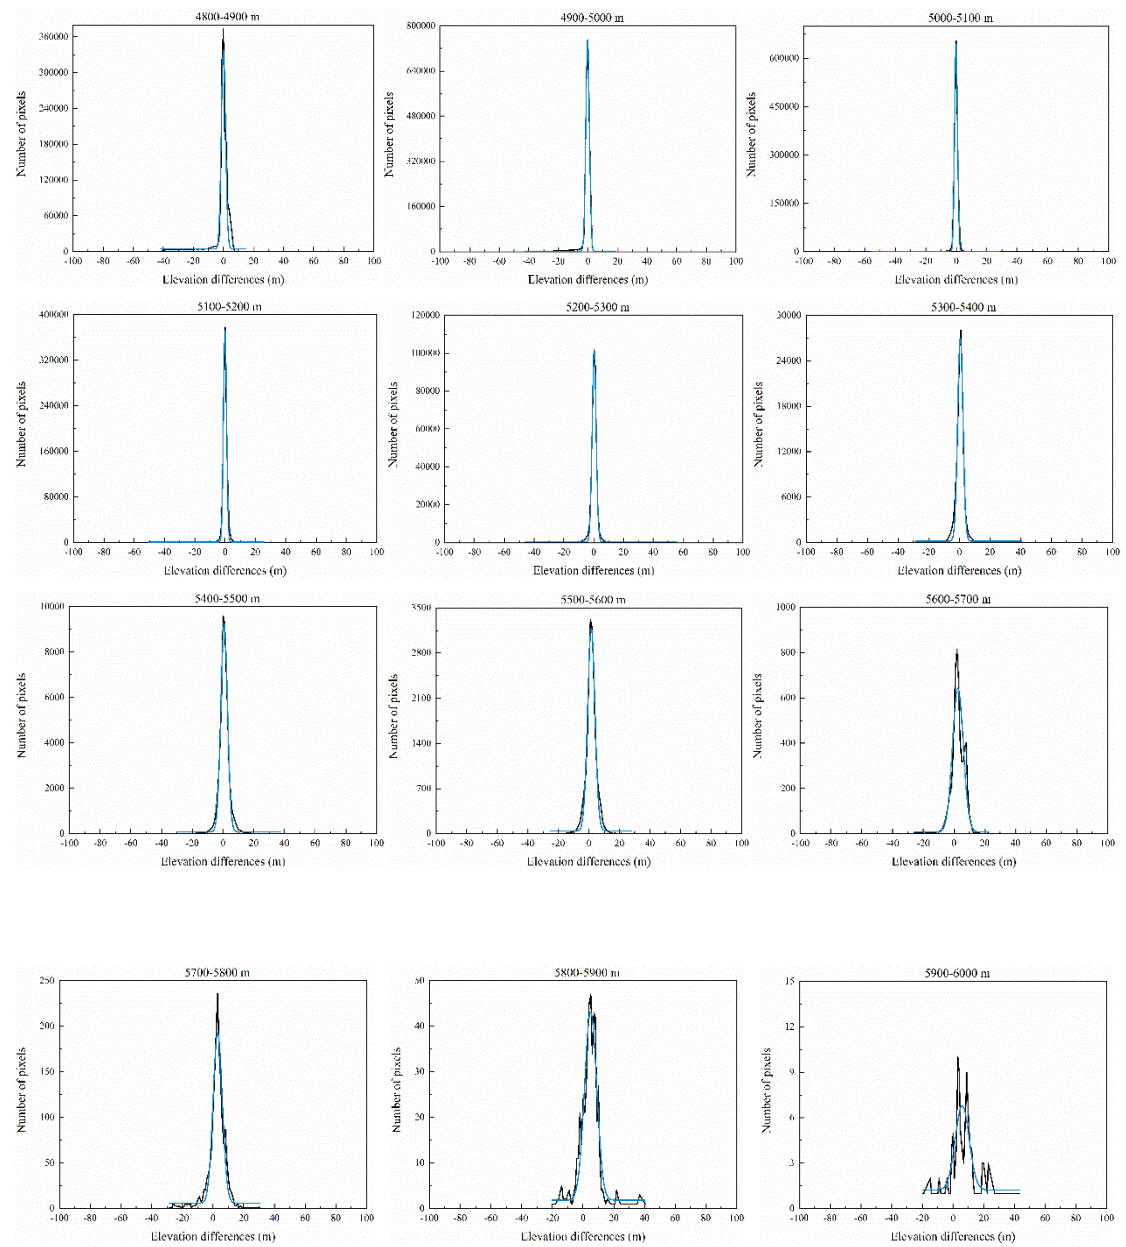

**Figure S4. Distribution of elevation changes between TSX/TDX-X and SRTM (black line) in each altitude interval. The blue line represents the corresponding gaussian fit.**

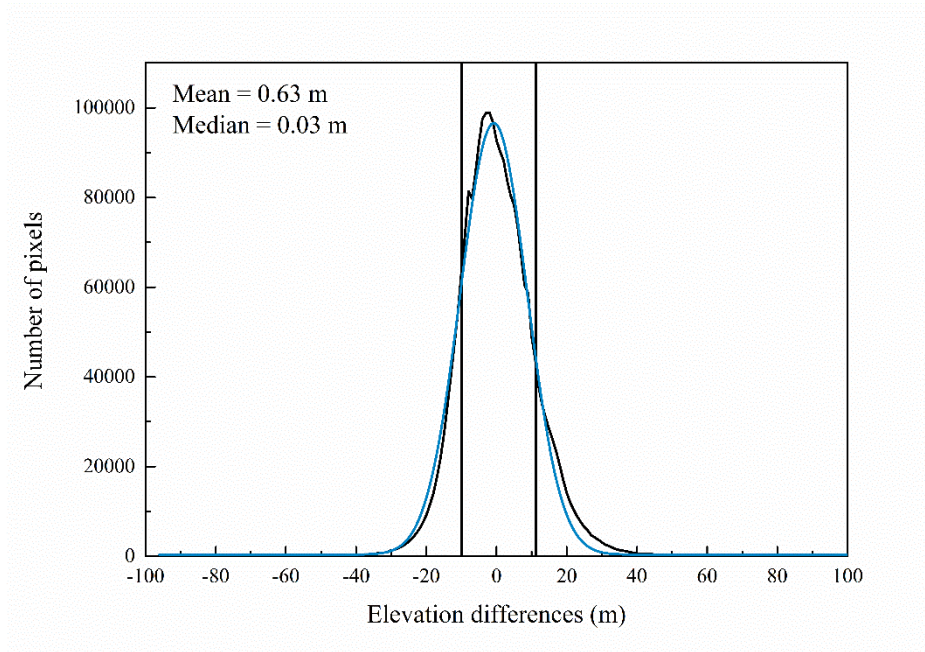

**Figure S5. Distribution of elevation differences (black line) between TSX/TDX-X and TOPO on the ice-free terrain after planimetric and vertical adjustment of the DEMs. The blue line represents the corresponding gaussian fit. The vertical lines represent the standard deviation of elevation differences.**

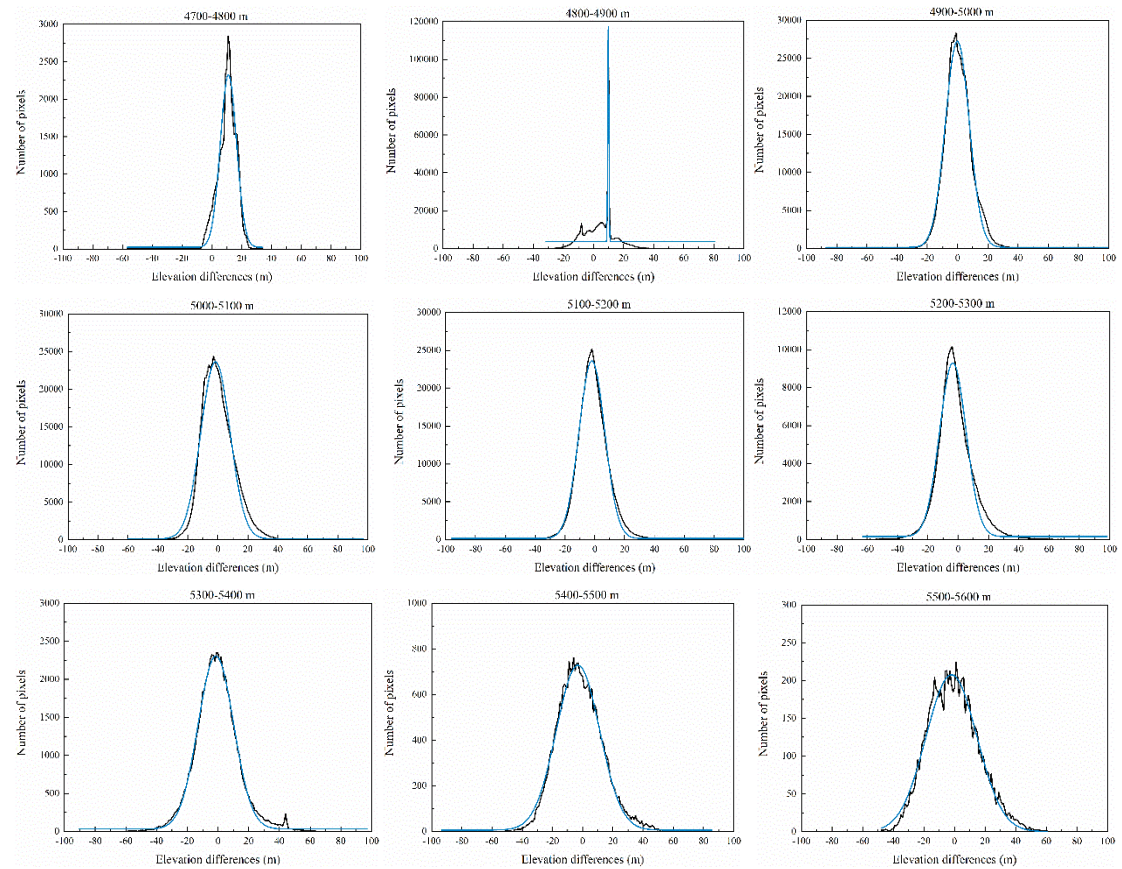

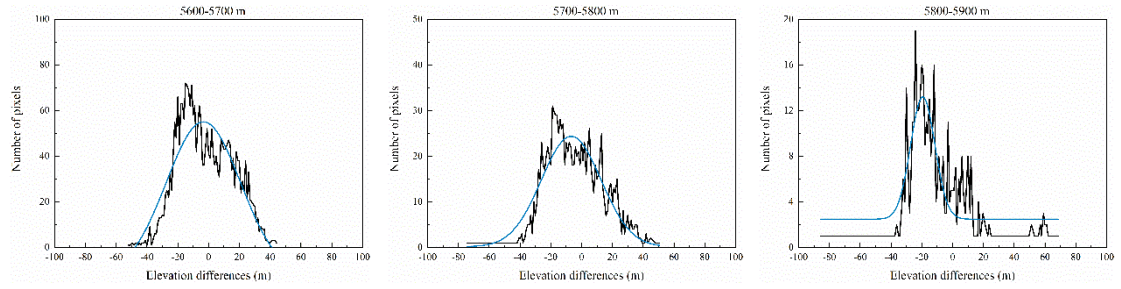

**Figure S6. Distribution of elevation changes between TSX/TDX-X and TOPO (black line) in each altitude interval. The blue line represents the corresponding gaussian fit.**

**Table S1. The AST14DEMO product used in our study.**

| Name                       | date         |
|----------------------------|--------------|
| AST14DMO_00307122000050012 | 12 Jul 2000  |
| AST14DMO_00309302000045910 | 30 Sept 2000 |
| AST14DMO_00310072000050455 | 7 Oct 2000   |
| AST14DMO_00310072000050504 | 7 Oct 2000   |
| AST14DMO_00305122001045435 | 12 May 2001  |
| AST14DMO_00312132001045430 | 13 Dec 2001  |
| AST14DMO_00312132001045421 | 13 Dec 2001  |
| AST14DMO_00312222001044757 | 22 Dec 2001  |
| AST14DMO_00310132002045206 | 13 Oct 2002  |
| AST14DMO_00310132002045157 | 13 Oct 2002  |
| AST14DMO_00303222003045151 | 22 Mar 2003  |
| AST14DMO_00309142003045019 | 14 Sept 2003 |
| AST14DMO_00309142003045028 | 14 Sept 2003 |
| AST14DMO_00309232003044432 | 23 Sept 2003 |
| AST14DMO_00304022004044451 | 2 Apr 2004   |
| AST14DMO_00308152004045036 | 15 Aug 2004  |
| AST14DMO_00309092004044417 | 9 Sept 2004  |
| AST14DMO_00310052005045010 | 5 Oct 2005   |
| AST14DMO_00310212005045003 | 21 Oct 2005  |
| AST14DMO_00310212005045012 | 21 Oct 2005  |
| AST14DMO_00311022006044415 | 2 Nov 2006   |
| AST14DMO_00311052007044433 | 5 Nov 2007   |
| AST14DMO_00311192007045651 | 19 Nov 2007  |
| AST14DMO_00304112008045705 | 11 Apr 2008  |
| AST14DMO_00304292008044505 | 29 Apr 2008  |
| AST14DMO_00301012009045144 | 1 Jan 2009   |
| AST14DMO_00301012009045153 | 1 Jan 2009   |
| AST14DMO_00310252009044500 | 25 Oct 2009  |
| AST14DMO_00309012010045044 | 1 Sept 2010  |

|                            |              |
|----------------------------|--------------|
| AST14DMO_00309102010044443 | 10 Sept 2010 |
| AST14DMO_00311292010044440 | 29 Nov 2010  |
| AST14DMO_00310132011045639 | 13 Oct 2011  |
| AST14DMO_00310222011045029 | 22 Oct 2011  |
| AST14DMO_00310312011044428 | 31 Oct 2011  |
| AST14DMO_00310312011044428 | 31 Oct 2011  |
| AST14DMO_00310082012045026 | 8 Oct 2012   |
| AST14DMO_00310082012045035 | 8 Oct 2012   |
| AST14DMO_00311022012044430 | 2 Nov 2012   |
| AST14DMO_00310112013045049 | 11 Oct 2013  |
| AST14DMO_00310112013045058 | 11 Oct 2013  |
| AST14DMO_00310202013044439 | 20 Oct 2013  |
| AST14DMO_00310272013045043 | 27 Oct 2013  |
| AST14DMO_00311212013044452 | 21 Nov 2013  |
| AST14DMO_00301242014044454 | 24 Jan 2014  |
| AST14DMO_00301242014044454 | 24 Jan 2014  |
| AST14DMO_00301312014045046 | 31 Jan 2014  |
| AST14DMO_00301312014045055 | 31 Jan 2014  |
| AST14DMO_00310232014044523 | 23 Oct 2014  |
| AST14DMO_00310012015045110 | 1 Oct 2015   |
| AST14DMO_00310012015045119 | 1 Oct 2015   |
| AST14DMO_00310172015045135 | 17 Oct 2015  |
| AST14DMO_00303252016045110 | 25 Mar 2016  |
| AST14DMO_00304172016045717 | 17 Apr 2016  |
| AST14DMO_00310032016045114 | 3 Oct 2016   |
| AST14DMO_00310032016045123 | 3 Oct 2016   |
| AST14DMO_00310192016045119 | 19 Oct 2016  |
| AST14DMO_00310062017045131 | 6 Oct 2017   |
| AST14DMO_00310062017045122 | 6 Oct 2017   |
| AST14DMO_00304252018044556 | 25 Apr 2018  |
| AST14DMO_00305112018044609 | 11 May 2018  |
